# Supplementary material
Source: Royal Society of Chemistry journal article supplement (doi:10.1039/d6dt00138f)
Supplement: d6dt00138f1.pdf [file d6dt00138f1.pdf]

## Electronic Supporting Information for:

### **Rational Design of Novel Organometallic *N*-Acyhydrazones with Potent Antiparasitic Activity on *Trypanosoma Cruzi* and *Brucei***

Patricia M. Toro-Sánchez <sup>a,\*</sup>, Andrea Lucero <sup>b</sup>, David Villaman <sup>c</sup>, Mauricio Moncada-Basualto <sup>d</sup>, Rodrigo Arancibia <sup>c</sup>, Shane R. Wilkinson <sup>e</sup>, Pedro Levín <sup>f</sup>, Jonathan Cisterna <sup>g</sup>, Iván Brito <sup>h</sup>, Concepción López <sup>i,\*</sup>

<sup>a</sup> Instituto de Ciencias Aplicadas (ICA), Facultad de Ingeniería, Universidad Autónoma de Chile, 5 Poniente 1670, Talca, Chile.

<sup>b</sup> Facultad de Ingeniería y Ciencias, Universidad Adolfo Ibáñez, Av. Padre Hurtado 750, Viña del Mar, Chile.

<sup>c</sup> Facultad de Ciencias Químicas, Universidad de Concepción, Concepción, Chile.

<sup>d</sup> Instituto Universitario de Investigación y Desarrollo Tecnológico, Universidad Tecnológica Metropolitana, Santiago, Chile.

<sup>e</sup> School of Biological and Chemical Sciences, Queen Mary University of London, Mile End Road, London E1 4NS, UK.

<sup>f</sup> Departamento de Química de los Materiales, Facultad de Química y Biología, Universidad de Santiago de Chile, Av. Libertador Bernardo O'Higgins 3363, Santiago, Chile.

<sup>g</sup> Departamento de Química, Universidad Católica del Norte, Antofagasta 1249004, Chile.

<sup>h</sup> Departamento de Química, Universidad de Antofagasta, Av. Universidad de Antofagasta 02800, Campus Coloso, Antofagasta, Chile.

<sup>i</sup> Departament de Química Inorgànica i Orgànica, Secció de Química Inorgànica, Facultat de Química, Universitat de Barcelona, Martí i Franquès 1-11, E-08028 Barcelona, Spain.

\*Corresponding author

E-mail addresses: patricia.toro@uautonoma.cl (P. M. Toro-Sánchez), conchi.lopez@qi.ub.edu (C. López).

**(64 pages)**

## Contents

### 1. Supplementary Experimental Part:

- 1.1. *General Comments.*
- 1.2. *Description of the method used for the preparation of organic acylhydrazones (4c – 7c).*
- 1.3. *Yields and characterization data for compounds 4c – 7c.*

### 2. Supplementary Figures

**Figure S1.** High-resolution mass spectra of compounds **4a**, **4b** and **4c** (see also *section 2.2.1* of the manuscript).

**Figure S2.** High-resolution mass spectra of compounds **5a**, **5b**, and **5c** (see also *section 2.2.1* of the manuscript).

**Figure S3.** High-resolution mass spectra of compounds **6a**, **6b**, and **6c**. (see also *section 2.2.1* of the manuscript).

**Figure S4.** High-resolution mass spectra of compounds **7a**, **7b**, and **7c** (see also *section 2.2.1* of the manuscript).

**Figure S5.** Mass spectra of compounds **4a** and **4b**.

**Figure S6.** Mass spectra of compounds **5a** and **5b**.

**Figure S7.** Mass spectra of compounds **6a** and **6b**.

**Figure S8.** Mass spectra of compounds **7a** and **7b**.

**Figure S9.** FT-IR spectra of compounds **4a**, **4b** and **4c**.

**Figure S10.** FT-IR spectra of compounds **5a**, **5b** and **5c**.

**Figure S11.** FT-IR spectra of compounds **6a**, **6b** and **6c**.

**Figure S12.** FT-IR spectra of compounds **7a**, **7b** and **7c**.

**Figure S13.** Intermolecular hydrogen bonds of **5a** along to [110] by N1–H1···O1 (1/2-x, 1/2-y, 1-z) and C9–H9···O2 (1-x, 2-y, 1-z). Donor-Acceptor distances (Å): N1–H1···O1, 2.918(5); C9–H9···O2, 3.353(7).

**Figure S14.** Crystal packing and the hydrogen bond N1–H1···O1 (2-x, 1-y, -z) in **6b**. Donor-Acceptor distance (Å): N1–H1···O1, 2.854(10); C10–H10···O6, 3.416(17).

**Figure S15.** Crystal packing and the hydrogen bond N1–H1···O1 (-x, -y, 1-z) in **4b**. Donor-Acceptor distance (Å): N1–H1···O1, 2.884(5); C11–H11···O5, 3.360(8).

**Figure S16.** Crystal packing and the hydrogen bond N1–H1···O1 (1-x, 2-y, 2-z) in **5b**. Donor-Acceptor distance (Å): N1–H1···O1, 2.912(9); C11–H11···O5, 3.330(12).

**Figure S17.** UV-Vis spectra of a freshly prepared solution of **4a** in a DMSO:Buffer solution (20:80) were recorded every 3 h up to 24 h and are shown in **A**. To facilitate visualization, a selection of those obtained at  $t = 0, 12,$  and 24 h is presented in **B**.

**Figure S18.** UV-Vis spectra of a freshly prepared solution of **5a** in a DMSO:Buffer solution (20:80) were recorded every 3 h up to 24 h and are shown in **A**. To facilitate visualization, a selection of those obtained at  $t = 0, 12,$  and 24 h is presented in **B**.

**Figure S19.** UV-Vis spectra of a freshly prepared solution of **6a** in a DMSO:Buffer solution (20:80) were recorded every 3 h up to 24 h and are shown in **A**. To facilitate visualization, a selection of those obtained at  $t = 0, 12,$  and 24 h is presented in **B**.

**Figure S20.** UV-Vis spectra of a freshly prepared solution of **7a** in a DMSO:Buffer solution (20:80) were recorded every 3 h up to 24 h and are shown in **A**. To facilitate visualization, a selection of those obtained at  $t = 0, 12,$  and 24 h is presented in **B**.

**Figure S21.** UV-Vis spectra of a freshly prepared solution of **4b** in a DMSO:Buffer solution (20:80) were recorded every 3 h up to 24 h and are shown in **A**. To facilitate visualization, a selection of those obtained at  $t = 0, 12,$  and 24 h is presented in **B**.

**Figure S22.** UV-Vis spectra of a freshly prepared solution of **5b** in a DMSO:Buffer solution (20:80) were recorded every 3 h up to 24 h and are shown in **A**. To facilitate visualization, a selection of those obtained at  $t = 0, 12,$  and 24 h is presented in **B**.

**Figure S23.** UV-Vis spectra of a freshly prepared solution of **6b** in a DMSO:Buffer solution (20:80) were recorded every 3 h up to 24 h and are shown in **A**. To facilitate visualization, a selection of those obtained at  $t = 0, 12,$  and 24 h is presented in **B**.

**Figure S24.** UV-Vis spectra of a freshly prepared solution of **7b** in a DMSO:Buffer solution (20:80) were recorded every 3 h up to 24 h and are shown in **A**. To facilitate visualization, a selection of those obtained at  $t = 0, 12,$  and 24 h is presented in **B**.

**Figure S25.**  $^1\text{H-NMR}$  spectrum (300 MHz) of compound **4a** in DMSO- $d_6$ .

**Figure S26.**  $^1\text{H-NMR}$  spectrum (300 MHz) of compound **5a** in DMSO- $d_6$ .

**Figure S27.**  $^1\text{H-NMR}$  spectrum (300 MHz) of compound **6a** in DMSO- $d_6$ .

**Figure S28.**  $^1\text{H-NMR}$  spectrum (300 MHz) of compound **7a** in DMSO- $d_6$ .

**Figure S29.**  $^1\text{H-NMR}$  spectrum (300 MHz) of compound **4b** in DMSO- $d_6$ .

**Figure S30.**  $^1\text{H}$ -NMR spectrum (300 MHz) of compound **5b** in  $\text{DMSO-}d_6$ .

**Figure S31.**  $^1\text{H}$ -NMR spectrum (300 MHz) of compound **6b** in  $\text{DMSO-}d_6$ .

**Figure S32.**  $^1\text{H}$ -NMR spectrum (300 MHz) of compound **7b** in  $\text{DMSO-}d_6$ .

**Figure S33.**  $^1\text{H}$  NMR spectrum (400 MHz) of compound **4c** in  $\text{DMSO-}d_6$ .

**Figure S34.**  $^1\text{H}$  NMR spectrum (400 MHz) of compound **5c** in  $\text{DMSO-}d_6$ .

**Figure S35.**  $^1\text{H}$  NMR spectrum (400 MHz) of compound **6c** in  $\text{DMSO-}d_6$ . The inserted plot shows an expansion of the region 8.0 – 7.5 ppm.

**Figure S36.**  $^1\text{H}$  NMR spectrum (400 MHz) of compound **7c** in  $\text{DMSO-}d_6$ . The inserted plot shows an expansion of the region 8.0 – 7.4 ppm.

**Figure S37.** [ $^1\text{H}$ - $^1\text{H}$ ] NOESY spectrum (400 MHz) of compound **4a** in  $\text{DMSO-}d_6$ .

**Figure S38.**  $^1\text{H}$ -NMR spectra (400 MHz) of complex **4b** in  $\text{DMSO-}d_6$  registered at variable temperatures (300 to 340 K).

**Figure S39.** Zoom-in of the NH and aromatic region of the  $^1\text{H}$ -NMR spectra (400 MHz) of **4b** recorded at different temperatures (300 to 340 K).

**Figure S40.** Cyclic voltammograms of **4a** at different scan rates of 0.1 – 2.00  $\text{V s}^{-1}$  in DMSO (TBAP 0.1 M, HMDE, Pt, non-aqueous Ag/AgCl).

**Figure S41.** Cyclic voltammograms of **4b** at different scan rates of 0.1 – 2.00  $\text{V s}^{-1}$  in DMSO (TBAP 0.1 M, HMDE, Pt, non-aqueous Ag/AgCl).

**Figure S42.** Cyclic voltammograms of **5a** at different scan rates of 0.1 – 2.00  $\text{V s}^{-1}$  in DMSO (TBAP 0.1 M, HMDE, Pt, non-aqueous Ag/AgCl).

**Figure S43.** Cyclic voltammograms of **6a** at different scan rates of 0.1 – 2.00  $\text{V s}^{-1}$  in DMSO (TBAP 0.1 M, HMDE, Pt, non-aqueous Ag/AgCl).

**Figure S44.** Cyclic voltammograms of **7a** at different scan rates of 0.1 – 2.00  $\text{V s}^{-1}$  in DMSO (TBAP 0.1 M, HMDE, Pt, non-aqueous Ag/AgCl).

**Figure S45.** Cyclic voltammograms of **7b** at different scan rates of 0.1 – 2.00  $\text{V s}^{-1}$  in DMSO (TBAP 0.1 M, HMDE, Pt, non-aqueous Ag/AgCl).

**Figure S46.** Differential pulse voltammograms of **5b** (A) and **6b** (B) derivatives. All experiments were performed in DMSO (TBAP 0.1 M, HMDE, Pt, non-aqueous Ag/AgCl).

**Figure S47.** Comparative plot of the SI values obtained for NAH compounds (**4a**, **5a**, **6a**, **6b**, **7a**, and Nfx) in *T. cruzi* (A) and *T. brucei* (B).

**Figure S48.** Comparative plot of all the NAH compounds (types **E**, **F**, and **G**, and **I** with  $R^2 = H$ ) of their anti-*T. cruzi* activity ( $EC_{50}$ ) and selectivity (SI).

### 3. Supplementary Table

**Table S1.** Crystal data, experimental details, and refinement parameters for complexes  $[Re\{(\eta^5-C_5H_4)-C(O)-NH-N=CH-(2-C_4H_2S-4-NO_2)\}(CO)_3]$  (**4b**),  $[Fe(\eta^5-C_5H_5)\{(\eta^5-C_5H_4)-C(O)-NH-N=C(Me)-(2-C_4H_2S-4-NO_2)\}]$  (**5a**),  $[Re\{(\eta^5-C_5H_4)-C(O)-NH-N=C(Me)-(2-C_4H_2S-4-NO_2)\}(CO)_3]$  (**5b**) and  $[Re\{(\eta^5-C_5H_4)-C(O)-NH-N=CH-(2-C_4H_2S-5-NO_2)\}(CO)_3]$  (**6b**).

**Table S2.** Bond lengths [ $\text{\AA}$ ] and angles [ $^\circ$ ] for **4b**.

**Table S3.** Bond lengths [ $\text{\AA}$ ] and angles [ $^\circ$ ] for **5a**.

**Table S4.** Bond lengths [ $\text{\AA}$ ] and angles [ $^\circ$ ] for **5b**.

**Table S5.** Bond lengths [ $\text{\AA}$ ] and angles [ $^\circ$ ] for **6b**.

**Table S6.** Hydrogen bonds for **4b**.

**Table S7.** Hydrogen bonds for **5a**.

**Table S8.** Hydrogen bonds for **5b**.

**Table S9.** Hydrogen bonds for **6b**.

**Table S10.** Summary of experimental ultraviolet-visible spectroscopic data: position of the bands detected [wavelengths  $\lambda_i$  (nm)] and logarithms of their molar extinction coefficients [ $\log \epsilon_i$  ( $\epsilon_i$  in  $M^{-1} \text{ cm}^{-1}$ )] for the new organometallic NAHs (**4a,b – 7a,b**) [Types **H** and **I** in [Figure 3](#)].

### 4. Supplementary References

## Contents

### 1. Supplementary Experimental Part:

#### 1.1. General Comments.

The following chemical reagents were purchased from commercial suppliers and used as received: benzhydrazide (98%) (**1c**), 5-nitro-2-thiophenecarboxaldehyde (98%) (**3I**), trifluoroacetic acid (CF<sub>3</sub>COOH, 99%) and ethanol ( $\geq$  99.5%). 4-nitro-2-thiophenecarboxaldehyde (**2I**), 2-acetyl-4-nitrothiophene (**2II**) and 2-acetyl-5-nitrothiophene (**3II**) were synthesized as described in the literature [S1,S2]. The IR and high-resolution mass spectra (HRMS) were performed using the equipment indicated in the experimental section, *section 2.1 (chemical and methods)* of the manuscript. <sup>1</sup>H-NMR spectra were recorded at room temperature on a Bruker Advance 400 spectrometer using DMSO-*d*<sub>6</sub> (99.9%) as the solvent.

#### 1.2. Description of the method used for the preparation of organic acylhydrazones (**4c–7c**).

The organic acylhydrazones were readily prepared following the procedure described in the literature [S3,S4]. A few drops of CF<sub>3</sub>COOH were added to a mixture formed by 1.0 mmol amount of benzyhydrazide (**1c**) (136 mg) and the equimolar amount of the appropriate (4- or 5-)nitro-2-thiophenecarboxaldehyde (**2I** or **3I**) (157 mg, 1.0 mmol) or 2-acetyl-(4- or 5-)nitrothiophene (**2II** or **3II**) (171 mg, 1.0 mmol), and 15 mL of anhydrous ethanol (Scheme S1). The reaction mixture was then stirred under N<sub>2</sub> atmosphere at 80 °C for 5 h. After this period, the solid formed was separated by filtration, washed with ethanol, and dried in a vacuum.

#### 1.3. Yields and characterization data for compounds **4c – 7c**.

**Compound 4c.** Light brown. Yield: 85% (234 mg, 0.85 mmol). Anal. (%) Calc. for C<sub>12</sub>H<sub>9</sub>N<sub>3</sub>O<sub>3</sub>S: C, 52.36; H, 3.30 and N, 15.26. Found: C, 51.89; H, 3.43 and N, 14.70. HRMS (*m/z*): 276.0433 and calc. for [M + H]<sup>+</sup> C<sub>12</sub>H<sub>9</sub>N<sub>3</sub>O<sub>3</sub>S: 276.0437. FT-IR selected data ( $\nu$  in cm<sup>-1</sup>): 3447 [ $\nu$ (NH)] and 1650 [ $\nu$ (-C(O)-)]. <sup>1</sup>H-NMR data:  $\delta$  7.51 – 7.63 (m, 3H, C<sub>6</sub>H<sub>5</sub>), 7.90 (d, 2H, *J* = 7.4, C<sub>6</sub>H<sub>5</sub>), 8.11 (s, 1H, C<sub>4</sub>H<sub>2</sub>S), 8.67 (s, 1H, CH=N), 8.84 (s, 1H, C<sub>4</sub>H<sub>2</sub>S), 12.11 (s, 1H, NH).

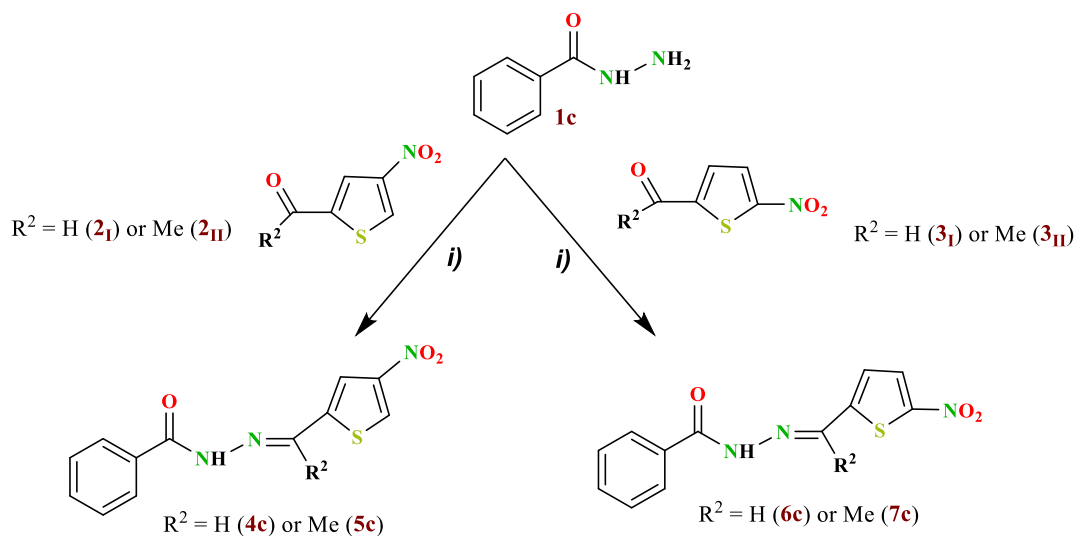

**Scheme S1.** Synthesis of the organic acylhydrazones (**4c – 7c**). Reagents and conditions: *i*) equimolar amounts of the reagents, in absolute ethanol at 80 °C for 5 h, and in the presence of catalytic amounts of CF<sub>3</sub>COOH.

**Compound 5c.** Light brown solid. Yield: 90% (260 mg, 0.90 mmol). Anal. (%) Calc. for C<sub>13</sub>H<sub>11</sub>N<sub>3</sub>O<sub>3</sub>S: C, 53.97; H, 3.83 and N, 14.52. Found: C, 53.49, H, 4.10 and N, 14.05. HRMS (*m/z*): 290.0597 and calc. for [M + H]<sup>+</sup> C<sub>13</sub>H<sub>11</sub>N<sub>3</sub>O<sub>3</sub>S: 290.0594. FT-IR selected data ( $\nu$  in cm<sup>-1</sup>): 3298 [ $\nu$ (NH)] and 1646 [ $\nu$ (-C(O)-)]. <sup>1</sup>H-NMR data:  $\delta$  2.42 (s, 3H, Me), 7.50 – 7.61 (m, 3H, C<sub>6</sub>H<sub>5</sub>), 7.86 (s, 2H, C<sub>6</sub>H<sub>5</sub>), 8.05 (s, 1H, C<sub>4</sub>H<sub>2</sub>S), 8.80 (s, 1H, C<sub>4</sub>H<sub>2</sub>S), 11.00 (s, 1H, NH).

**Compound 6c.** Deep yellow. Yield: 89% (245 mg, 0.89 mmol). Anal. (%) Calc. for C<sub>12</sub>H<sub>9</sub>N<sub>3</sub>O<sub>3</sub>S: C, 52.36; H, 3.30 and N, 15.26. Found: 53.25; H, 3.40 and N, 15.17. HRMS (*m/z*): 276.0445 and calc. for [M + H]<sup>+</sup> C<sub>12</sub>H<sub>9</sub>N<sub>3</sub>O<sub>3</sub>S: 276.0437. FT-IR selected data ( $\nu$  in cm<sup>-1</sup>): 3249 [ $\nu$ (NH)] and 1641 [ $\nu$ (-C(O)-)]. <sup>1</sup>H-NMR data:  $\delta$  7.52 – 7.64 (m, 4H, C<sub>6</sub>H<sub>5</sub>), 7.90 (d, 2H, C<sub>4</sub>H<sub>2</sub>S and C<sub>6</sub>H<sub>5</sub>), 8.13 (d, 1H, *J* = 4.3, C<sub>4</sub>H<sub>2</sub>S), 8.66 (s, 1H, CH=N), 12.23 (s, 1H, NH).

**Compound 7c.** Crystal yellow. Yield: 83% (240 mg, 0.83 mmol). Anal. (%) Calc. for C<sub>13</sub>H<sub>11</sub>N<sub>3</sub>O<sub>3</sub>S: C, 53.97; H, 3.83 and N, 14.52. Found: C, 55.09; H, 3.98 and N, 14.41. HRMS (*m/z*): 290.0601 and calc. for [M + H]<sup>+</sup> C<sub>13</sub>H<sub>11</sub>N<sub>3</sub>O<sub>3</sub>S: 290.0594. FT-IR selected data ( $\nu$  in cm<sup>-1</sup>): 3302 [ $\nu$ (NH)] and 1646 [ $\nu$ (-C(O)-)]. <sup>1</sup>H-NMR data:  $\delta$  2.41 (s, 3H, Me), 7.50 – 7.62 (m, 4H, C<sub>6</sub>H<sub>5</sub>), 7.85 (ps-d, 2H, C<sub>4</sub>H<sub>2</sub>S and C<sub>6</sub>H<sub>5</sub>), 8.10 (d, 1H, *J* = 4.4, C<sub>4</sub>H<sub>2</sub>S), 11.10 (s, 1H, NH).

## 2. Supplementary Figures

**Figure S1.** High-resolution mass spectra of compounds **4a**, **4b** and **4c** (see also *section 2.2.1* of the manuscript).

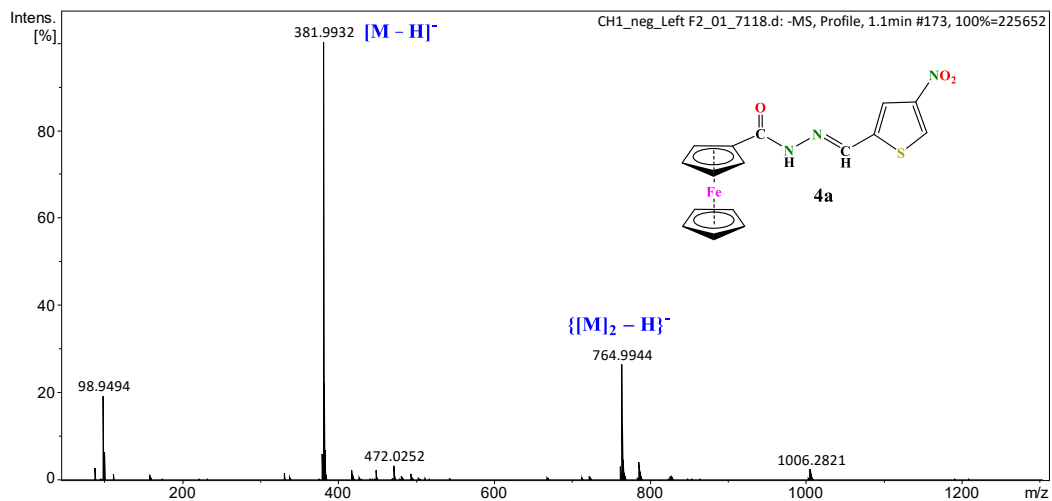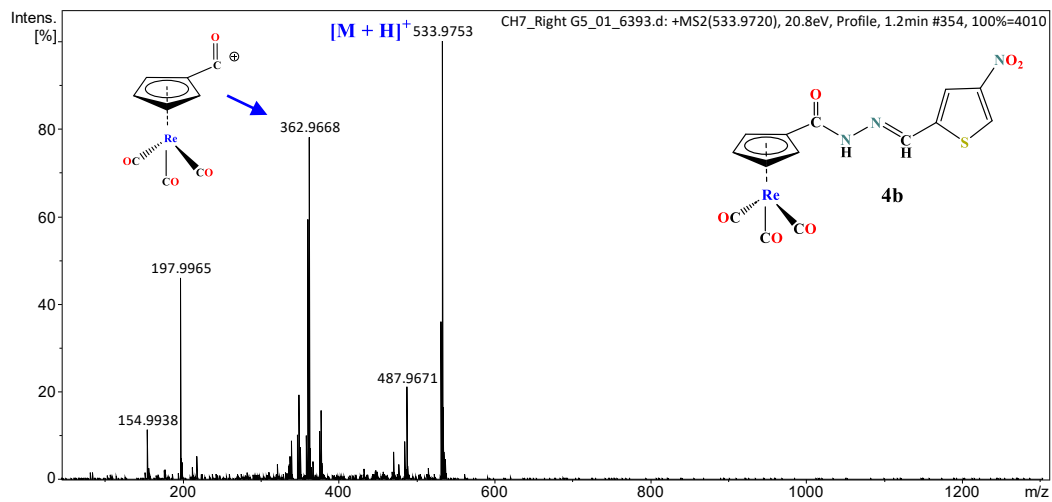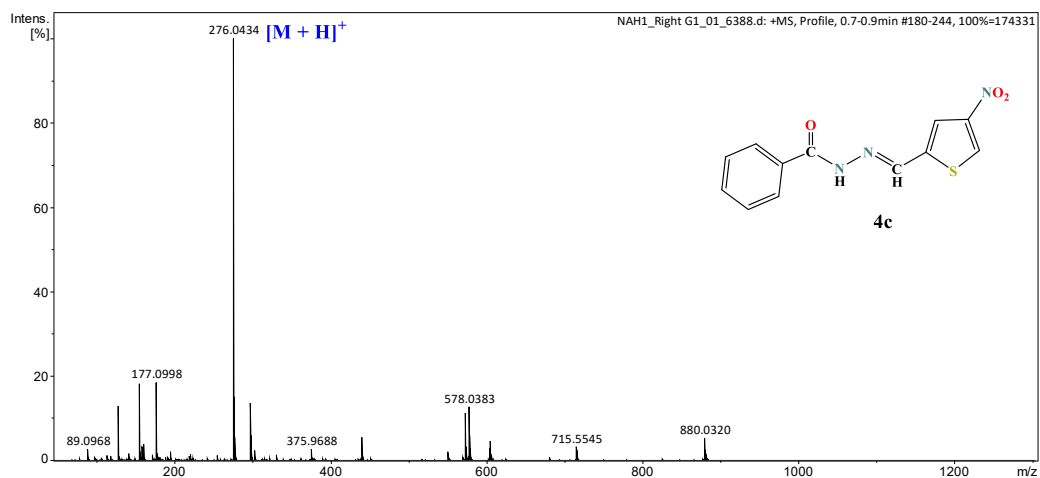

**Figure S2.** High-resolution mass spectra of compounds **5a**, **5b**, and **5c** (see also *section 2.2.1* of the manuscript).

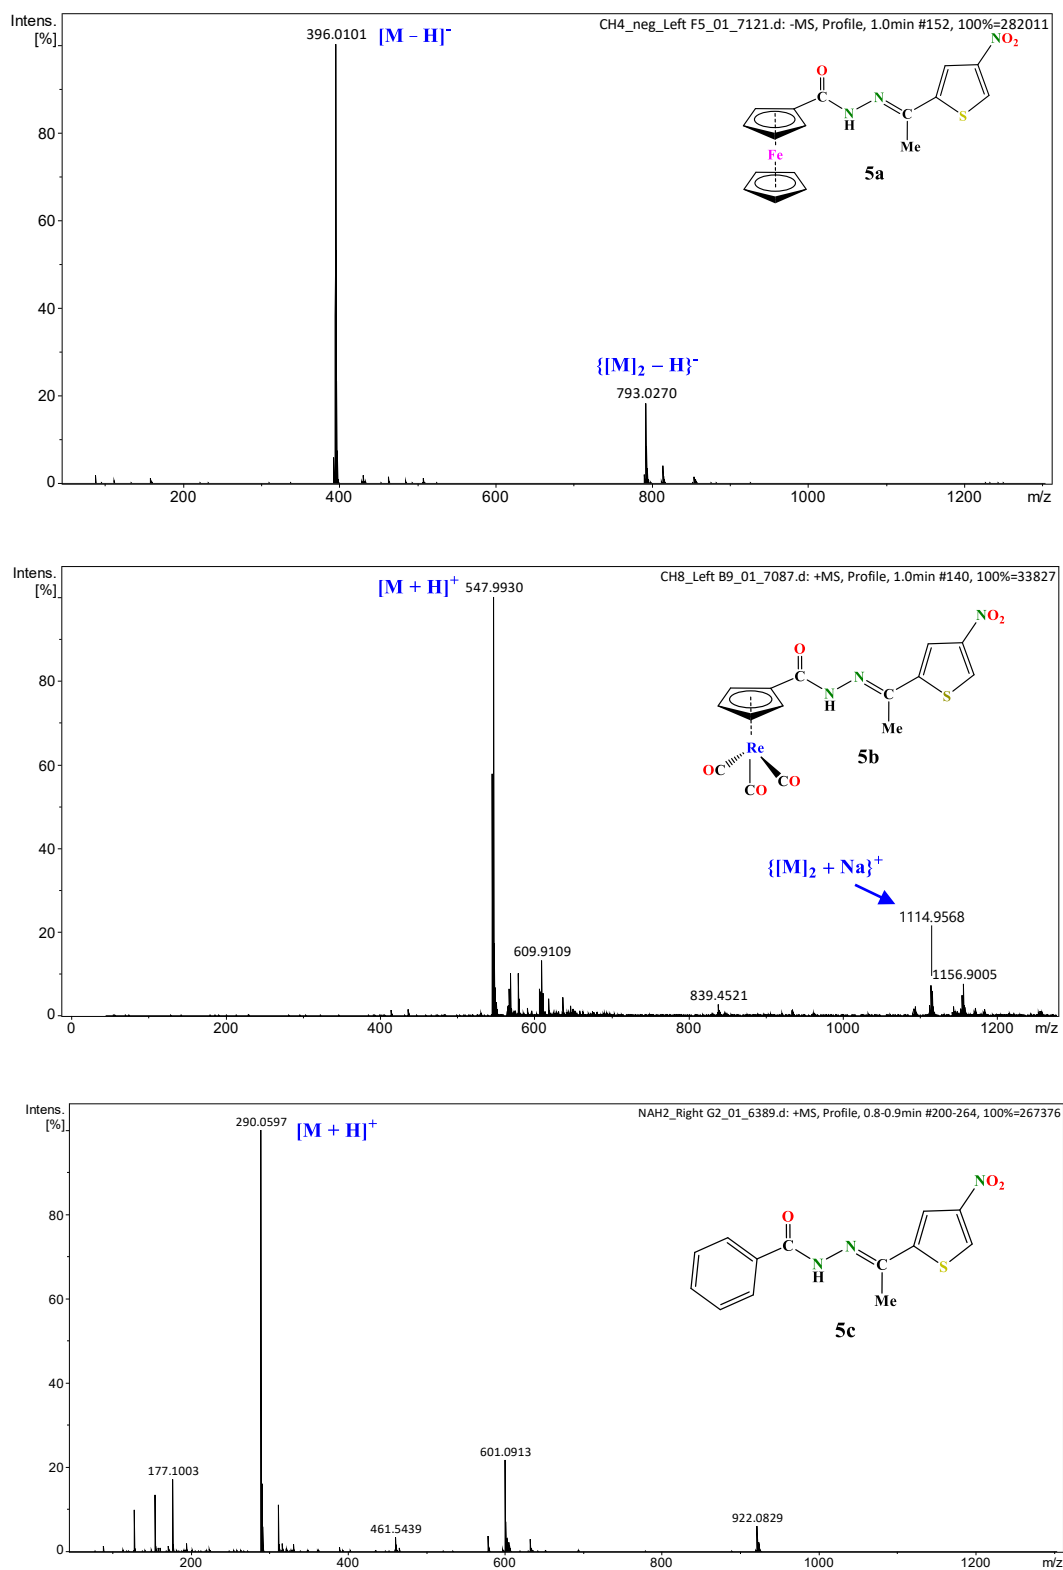

**Figure S3.** High-resolution mass spectra of compounds **6a**, **6b**, and **6c**. (see also *section 2.2.1* of the manuscript).

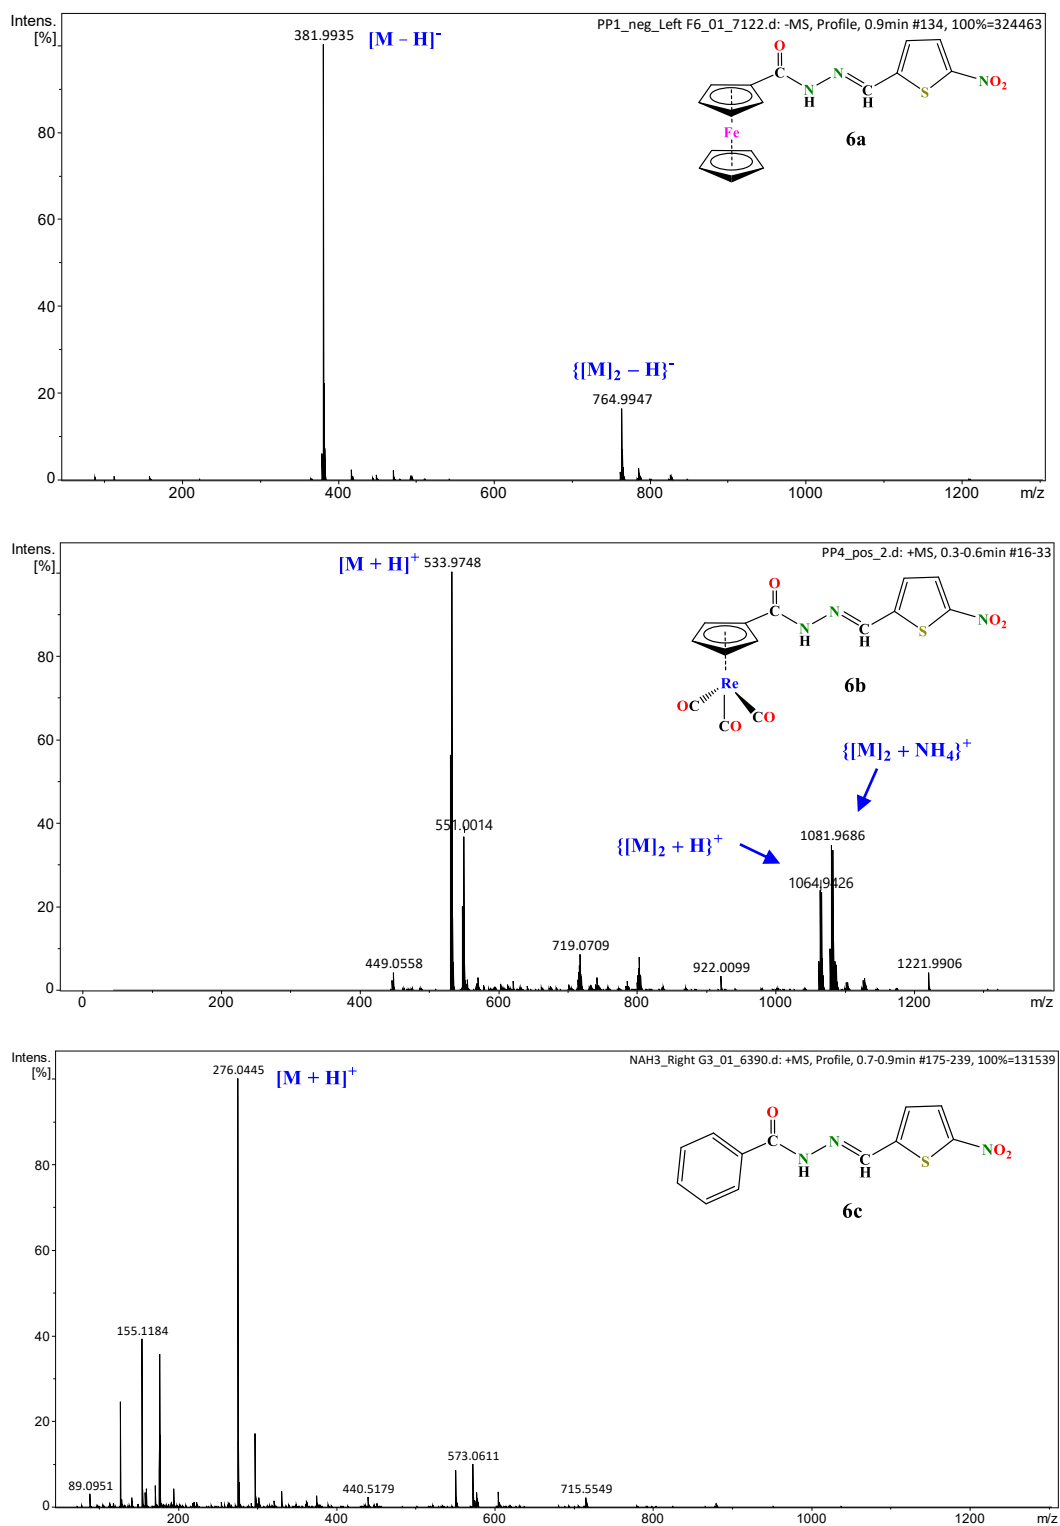

**Figure S4.** High-resolution mass spectra of compounds **7a**, **7b**, and **7c** (see also *section 2.2.1* of the manuscript).

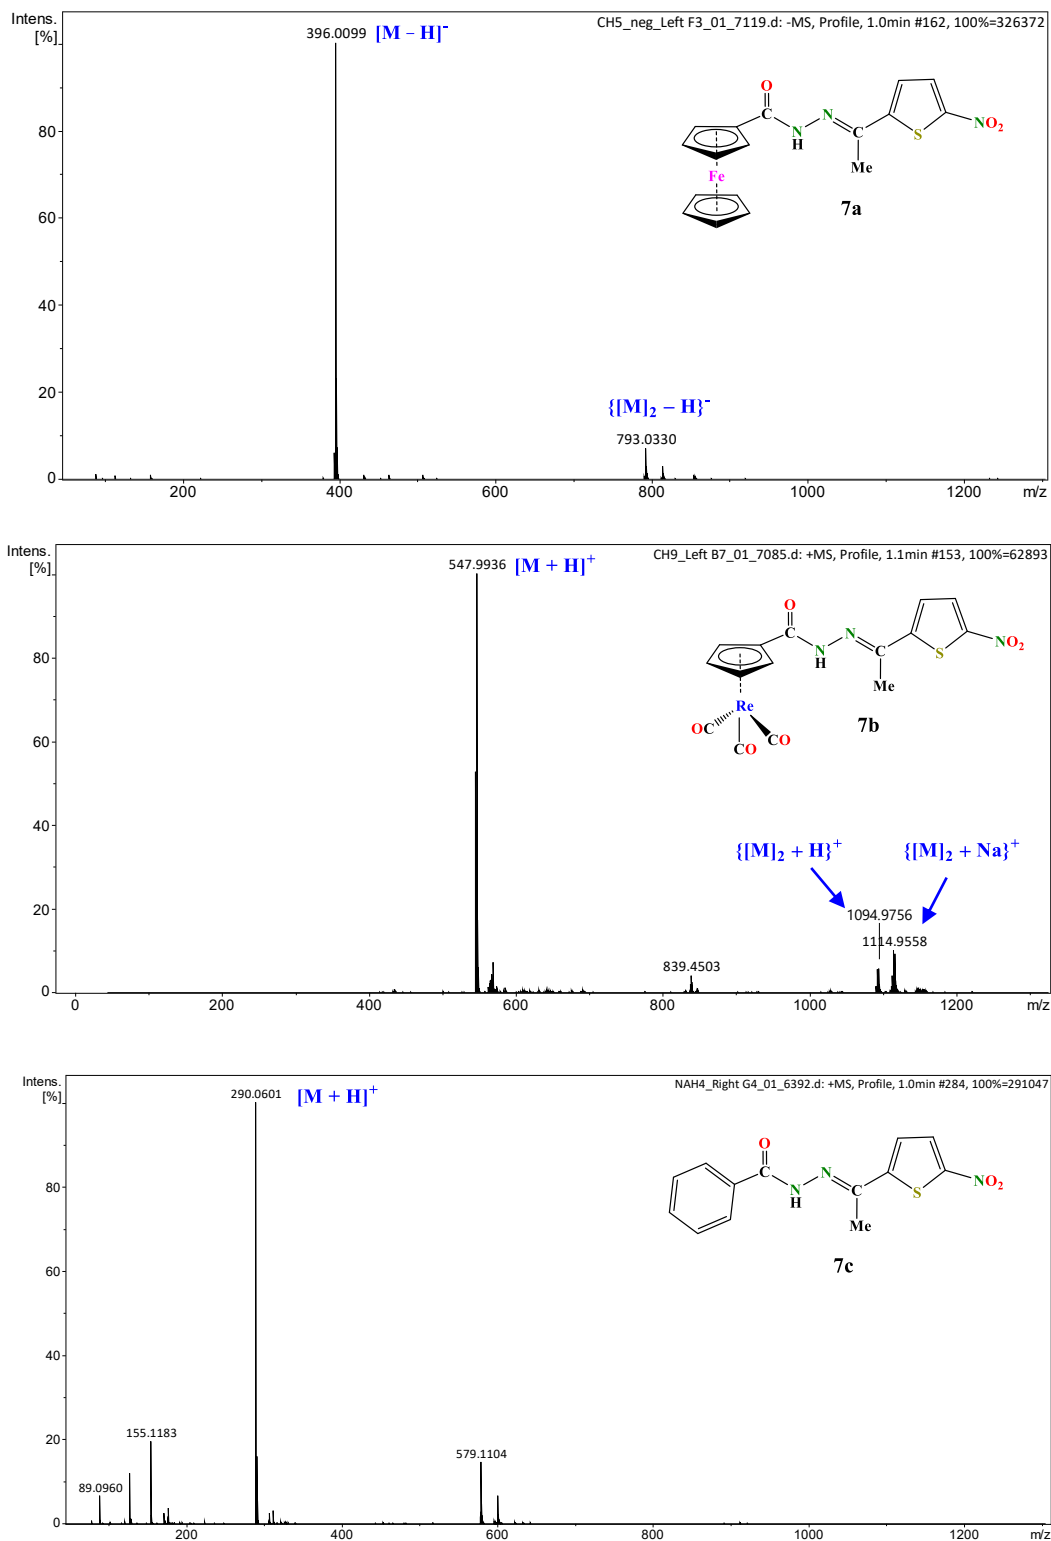

Figure S5. Mass spectra of compounds **4a** and **4b**.

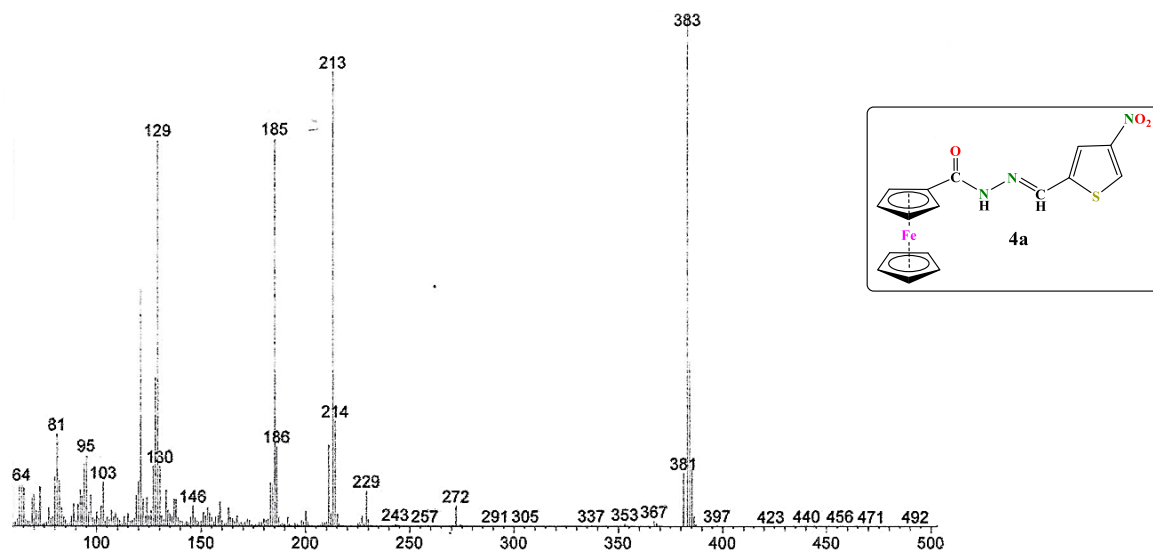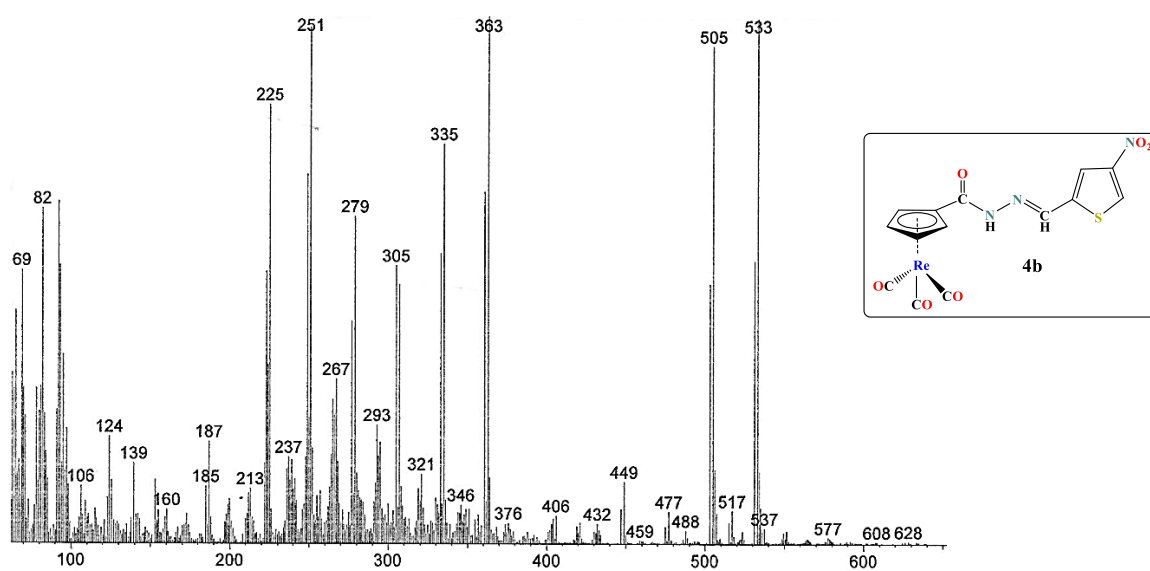

Figure S6. Mass spectra of compounds **5a** and **5b**.

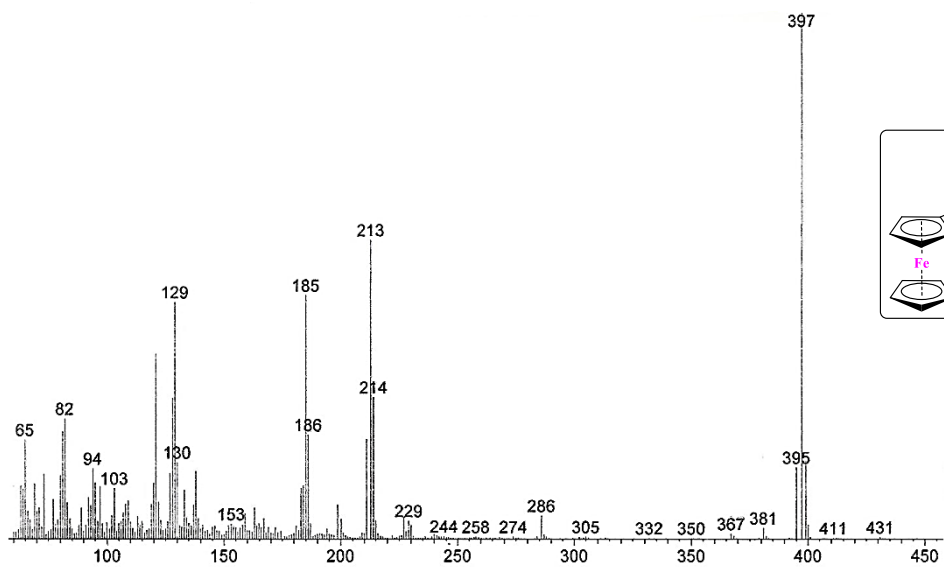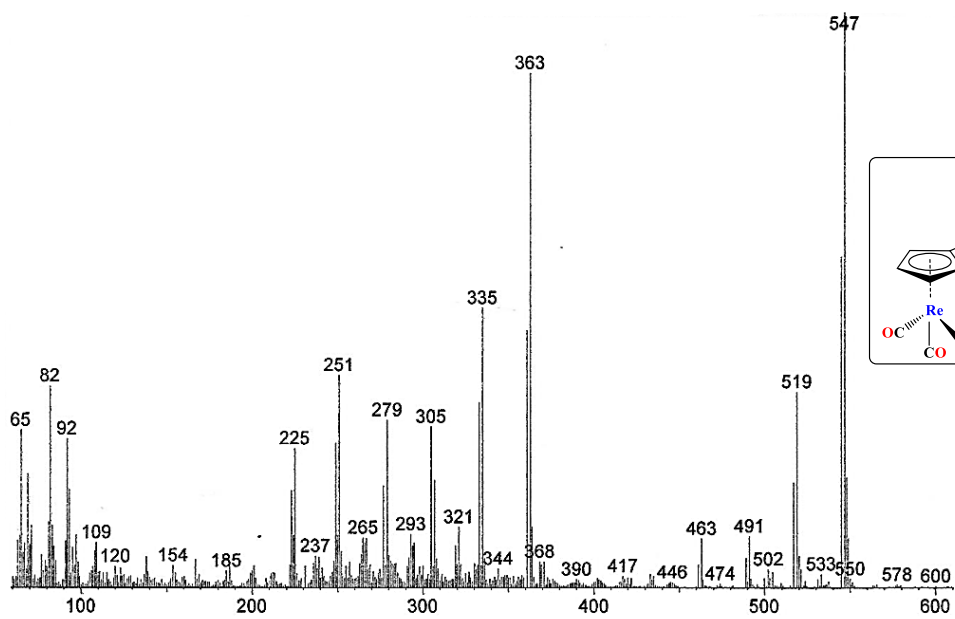

**Figure S7.** Mass spectra of compounds **6a** and **6b**.

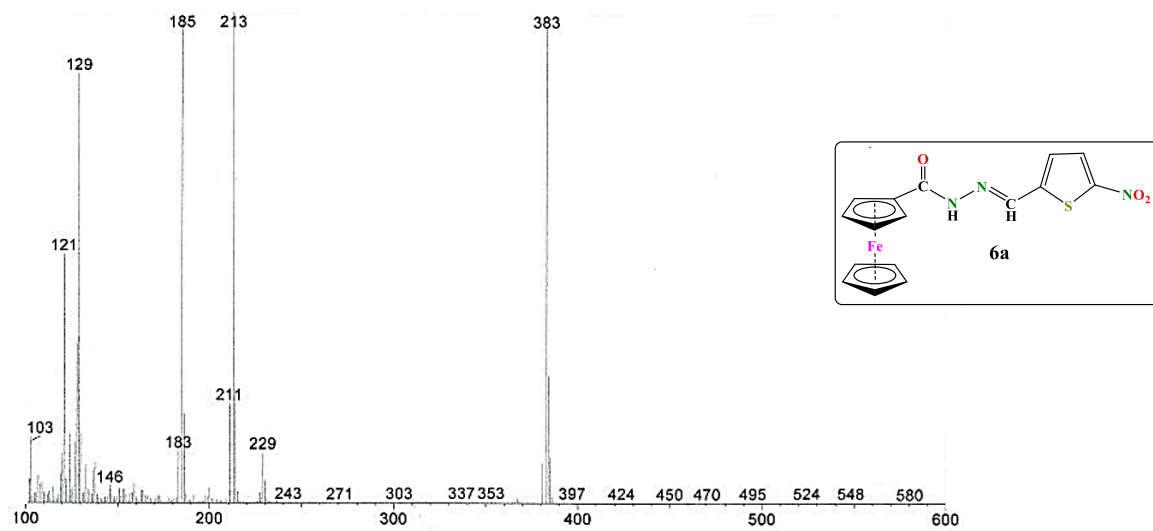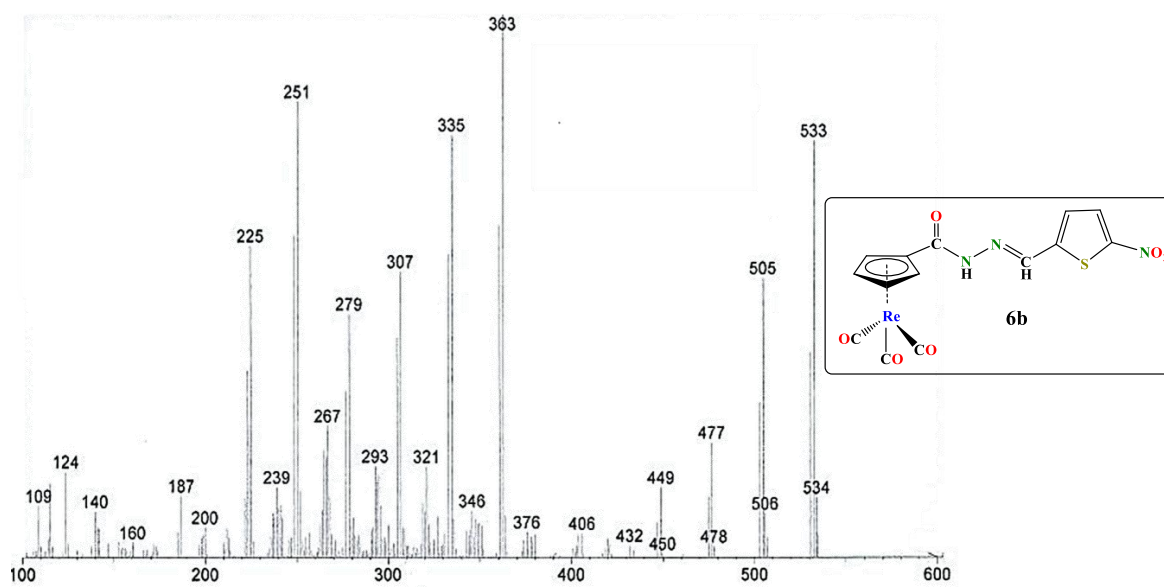

**Figure S8.** Mass spectra of compounds **7a** and **7b**.

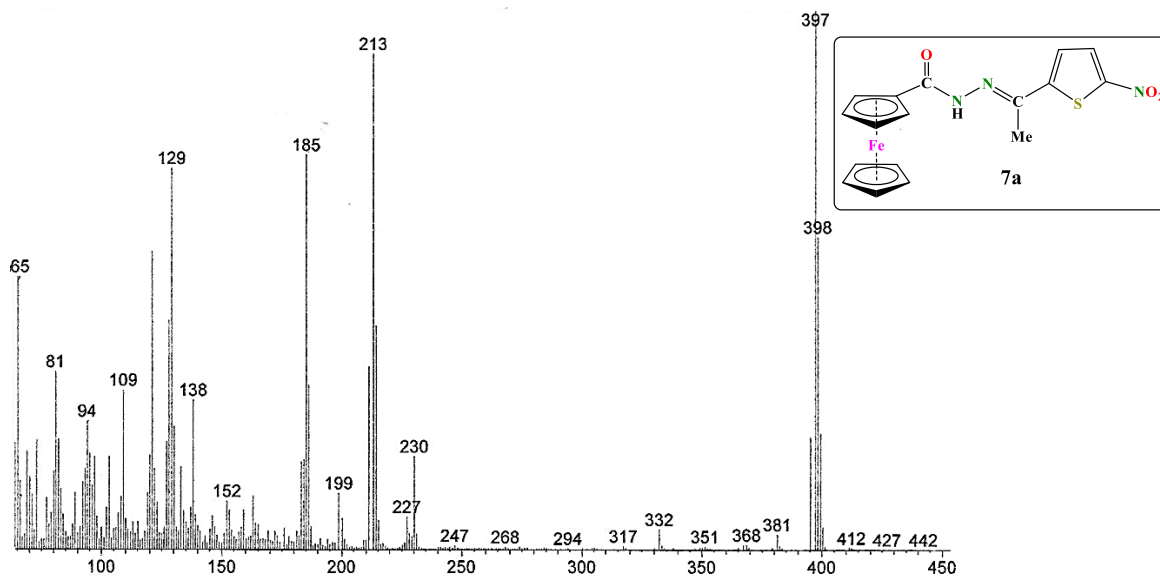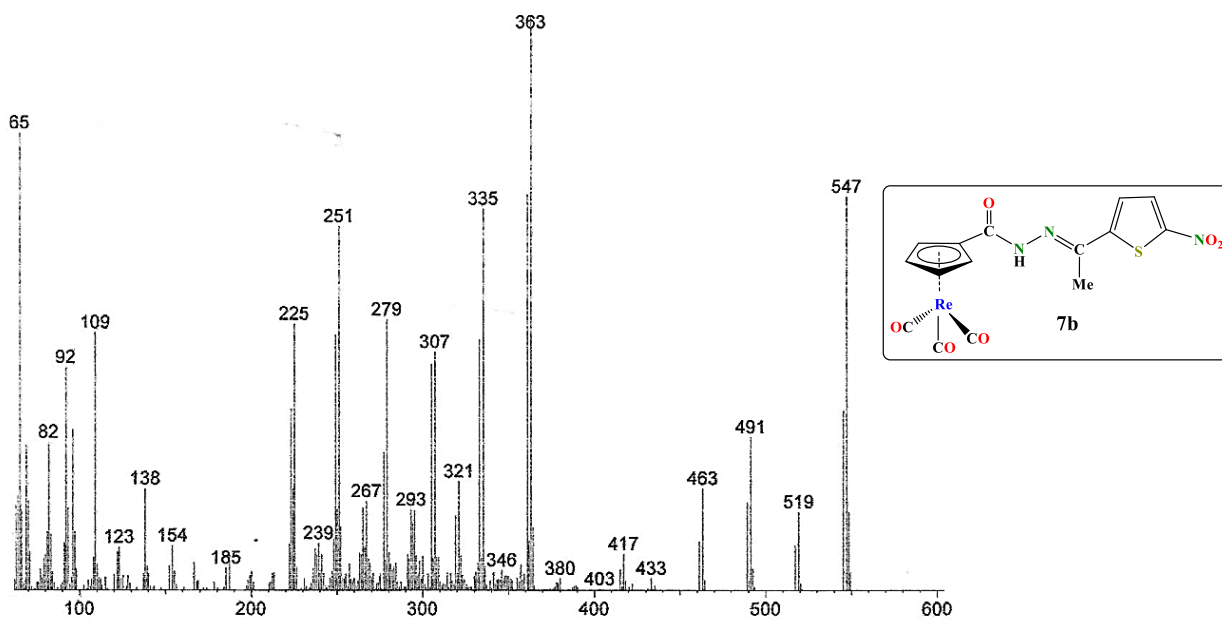

Figure S9. FT-IR spectra of compounds **4a**, **4b** and **4c**.

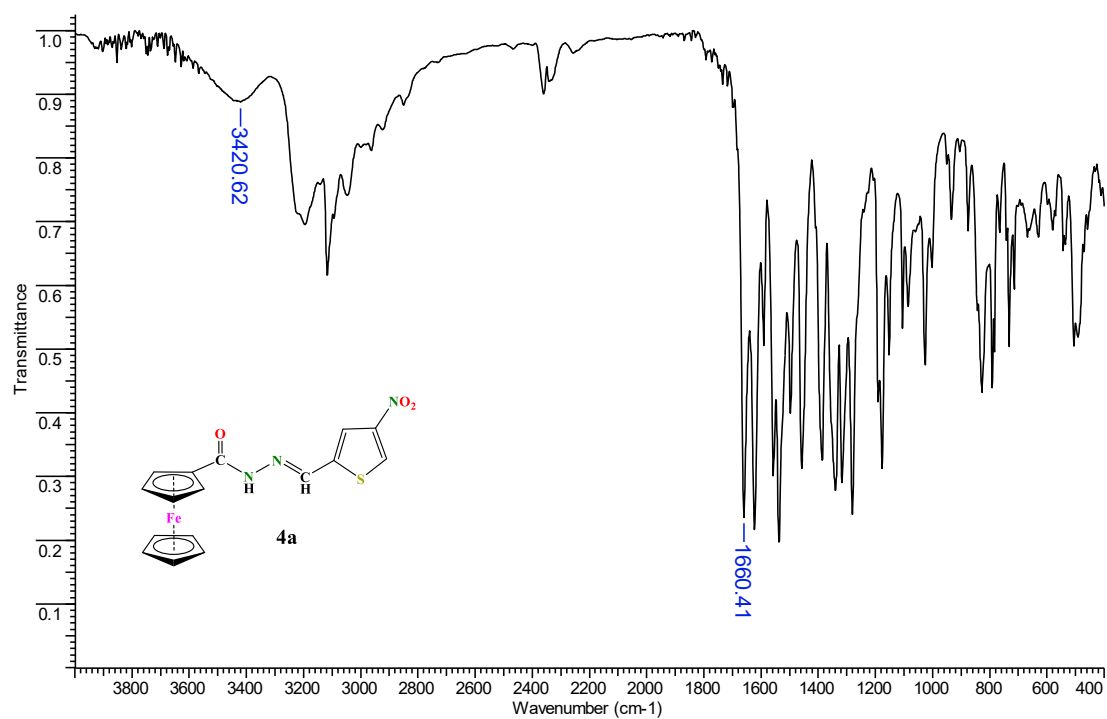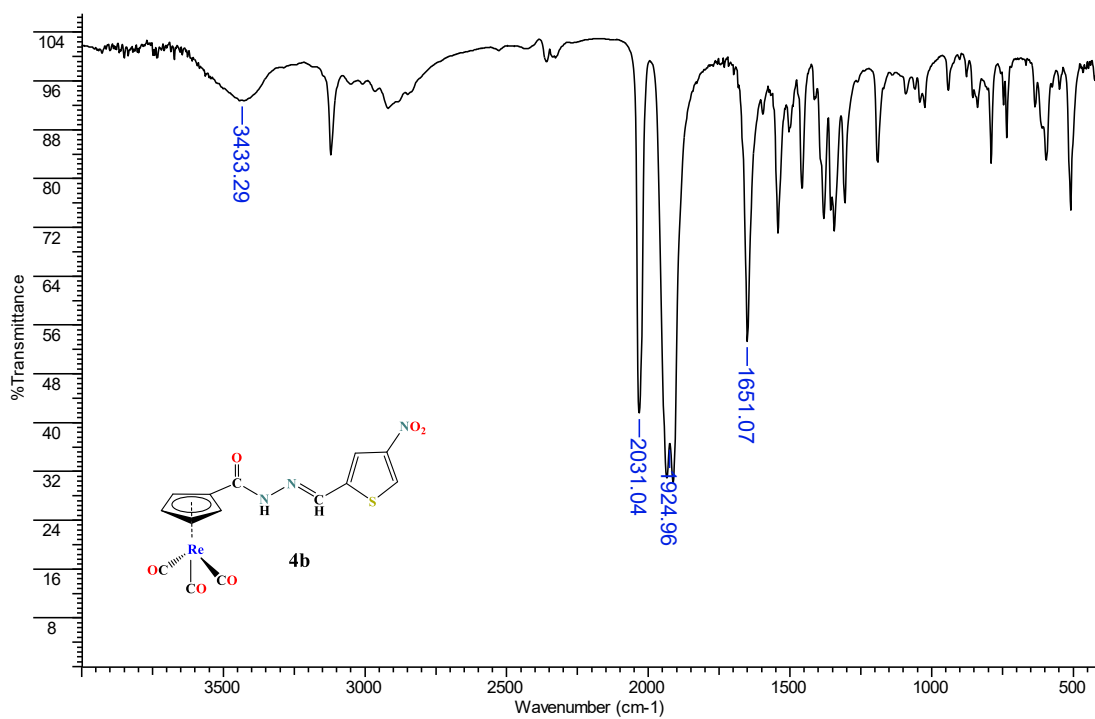

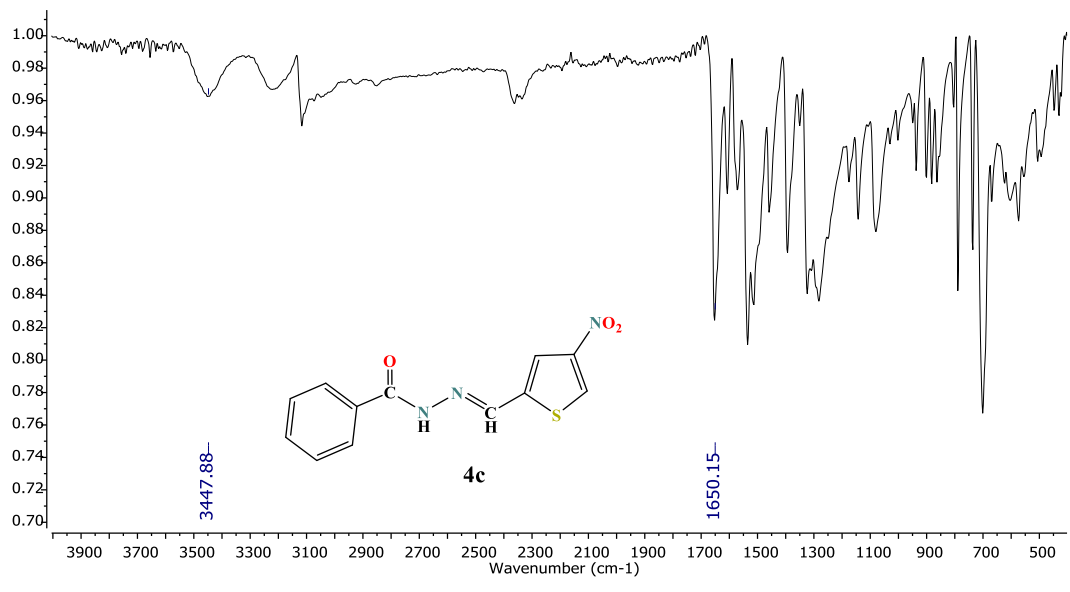

Figure S10. FT-IR spectra of compounds **5a**, **5b** and **5c**.

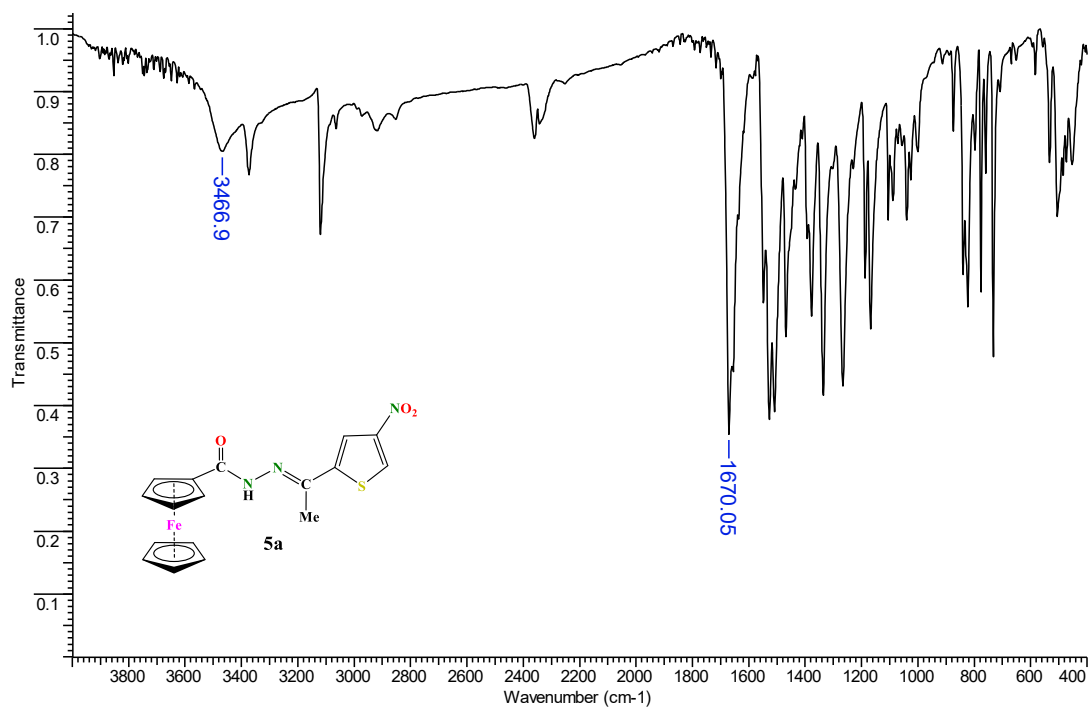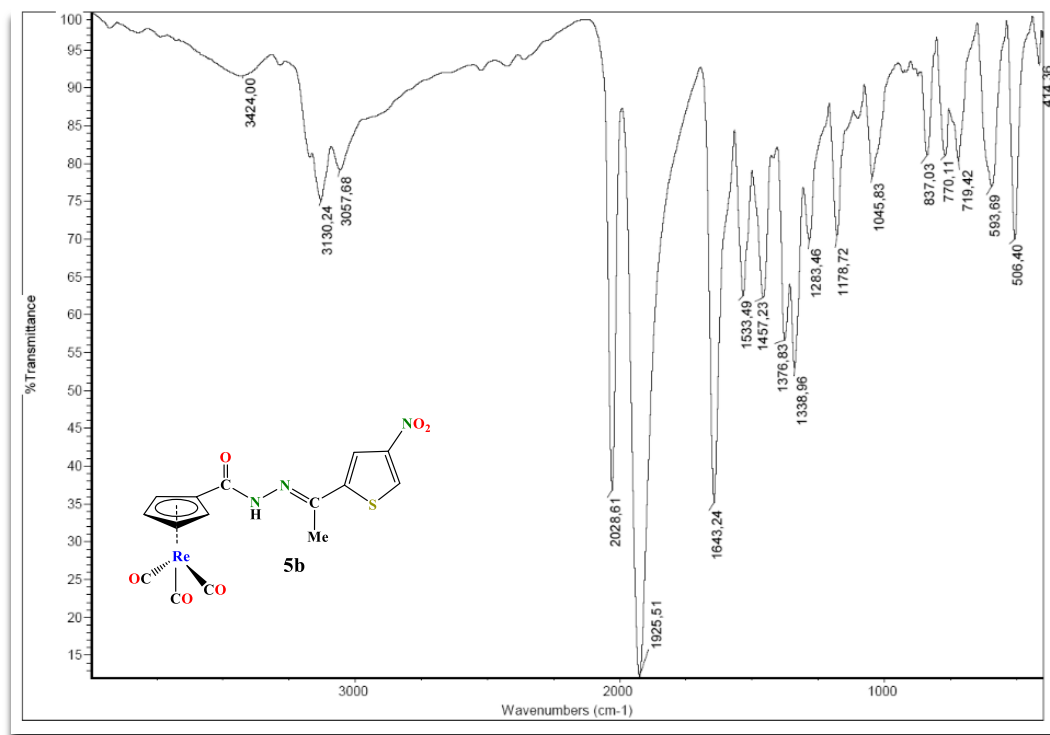

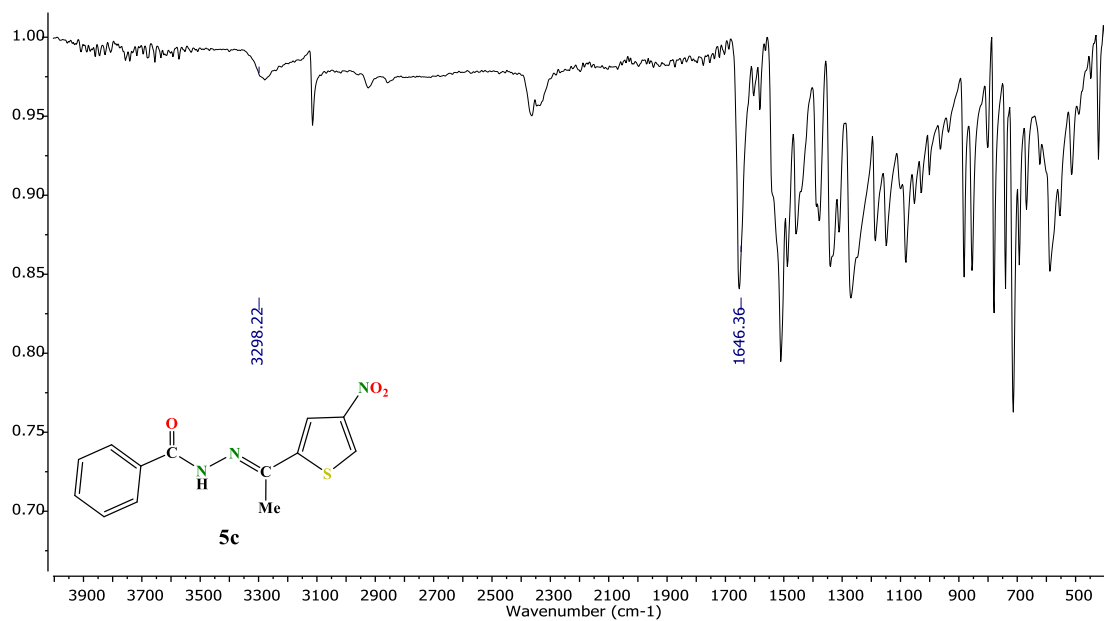

**Figure S11.** FT-IR spectra of compounds **6a**, **6b** and **6c**.

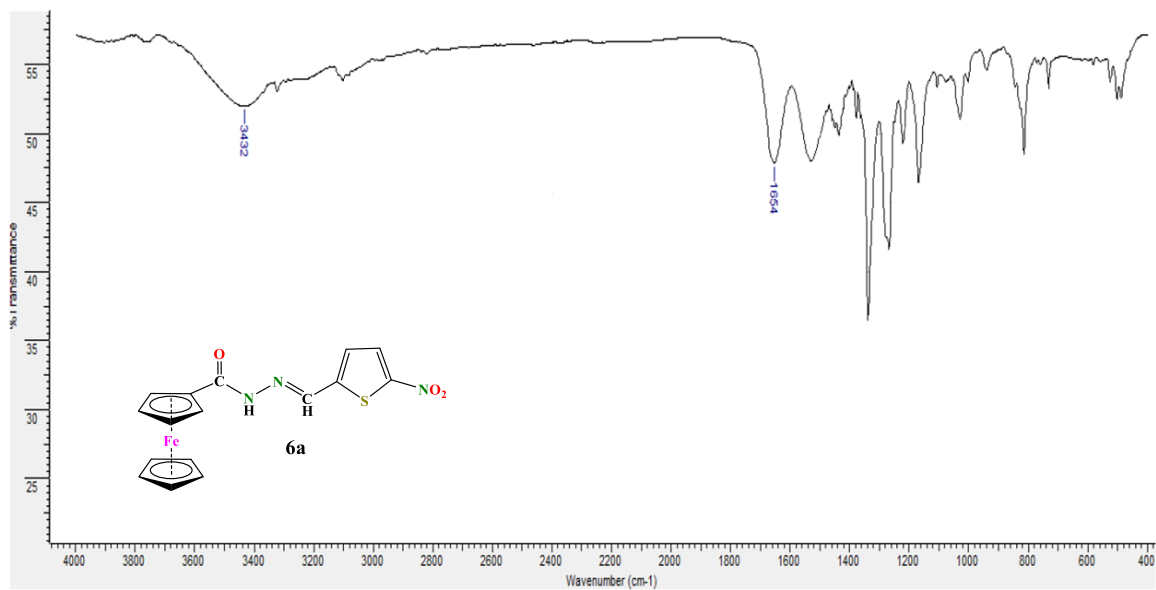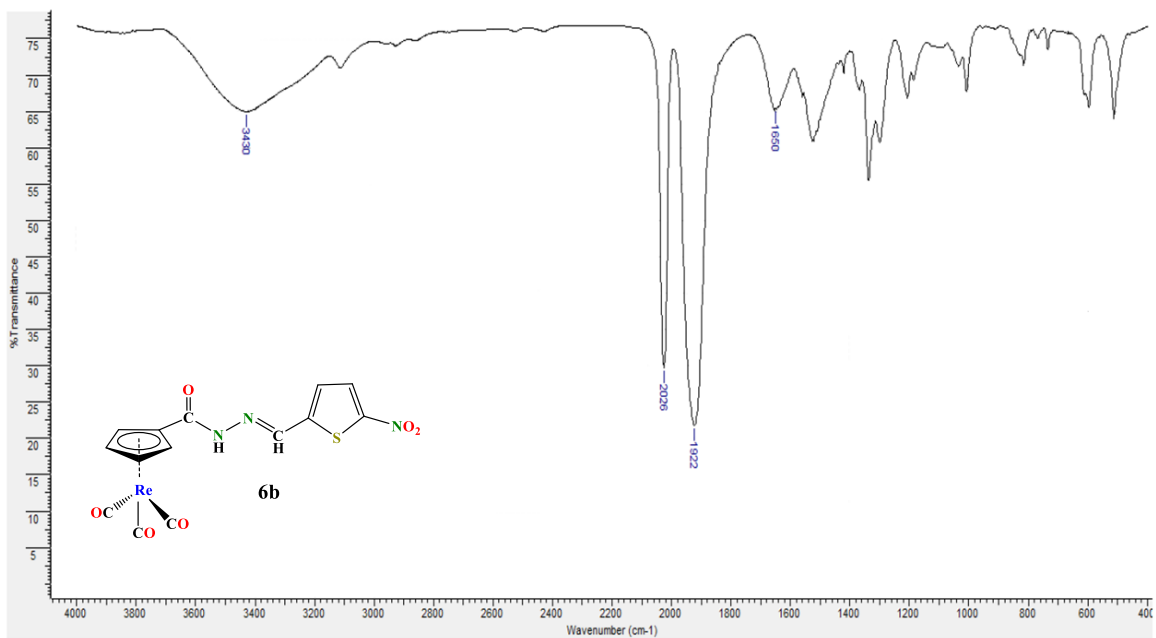

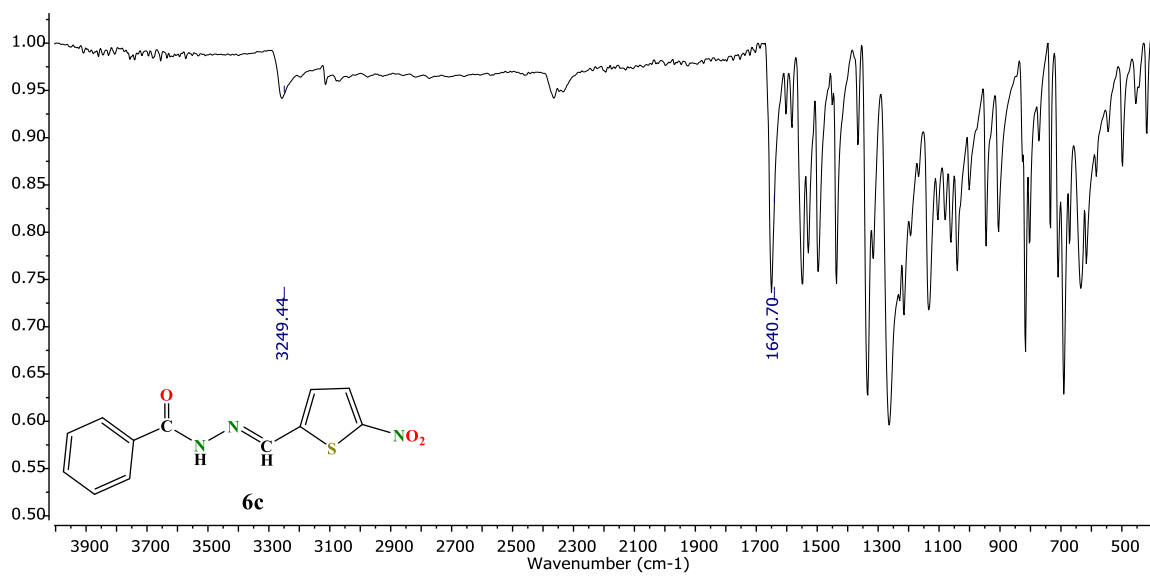

**Figure S12.** FT-IR spectra of compounds **7a**, **7b** and **7c**.

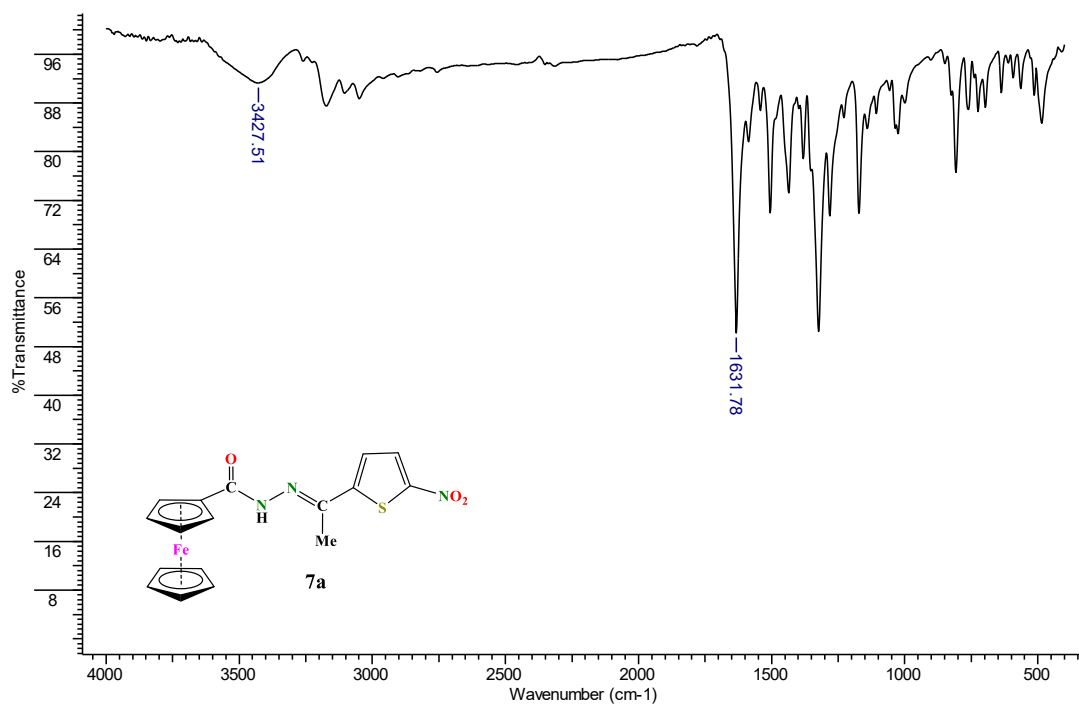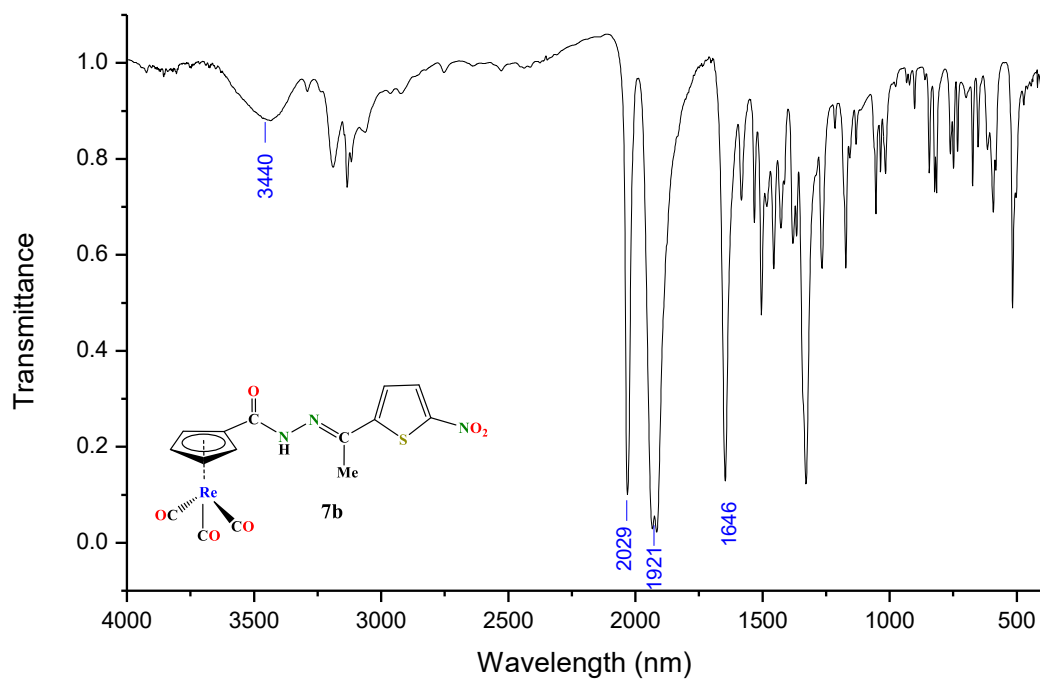

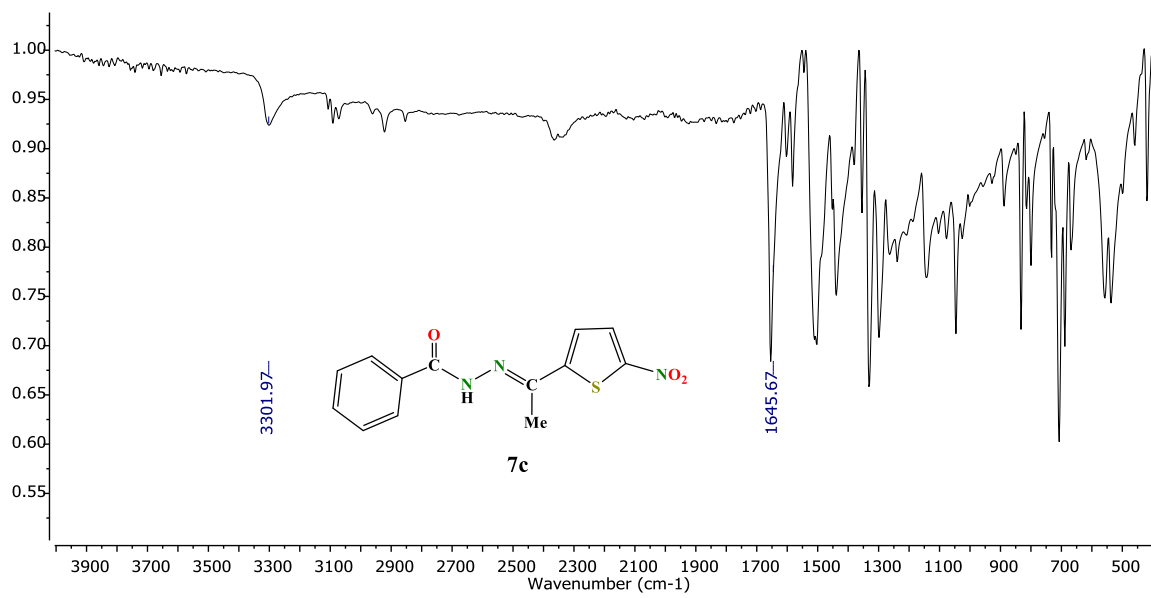

**Figure S13.** Intermolecular hydrogen bonds of **5a** along to [110] by N1–H1···O1 ( $1/2-x, 1/2-y, 1-z$ ) and C9–H9···O2 ( $1-x, 2-y, 1-z$ ). Donor-Acceptor distances (Å): N1–H1···O1, 2.918(5); C9–H9···O2, 3.353(7).

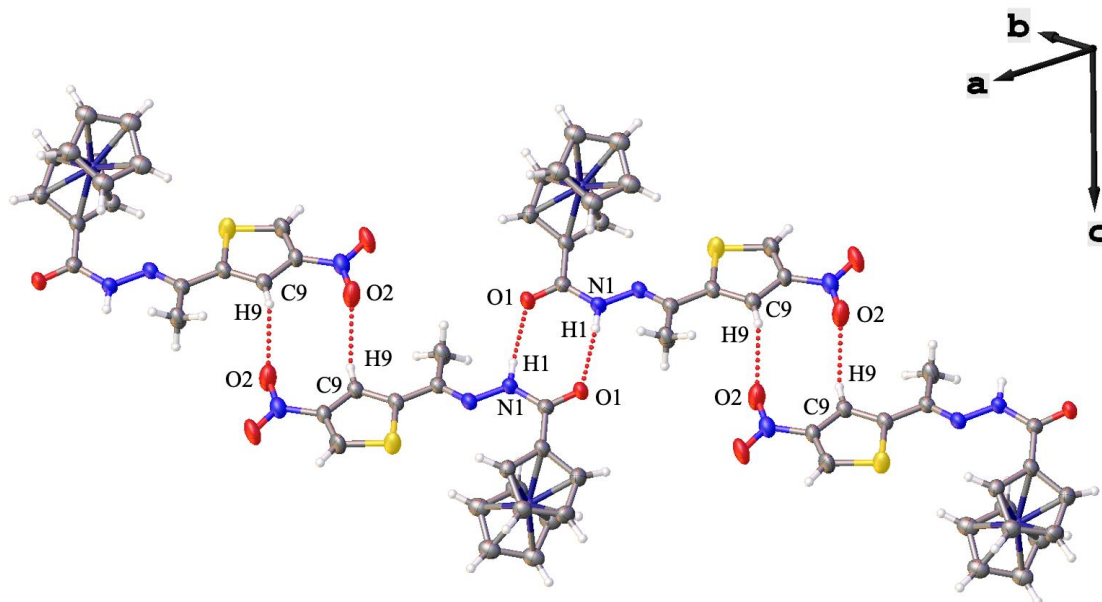

**Figure S14.** Crystal packing and the hydrogen bond N1–H1···O1 ( $2-x, 1-y, -z$ ) in **6b**. Donor-Acceptor distance (Å): N1–H1···O1, 2.854(10); C10–H10···O6, 3.416(17).

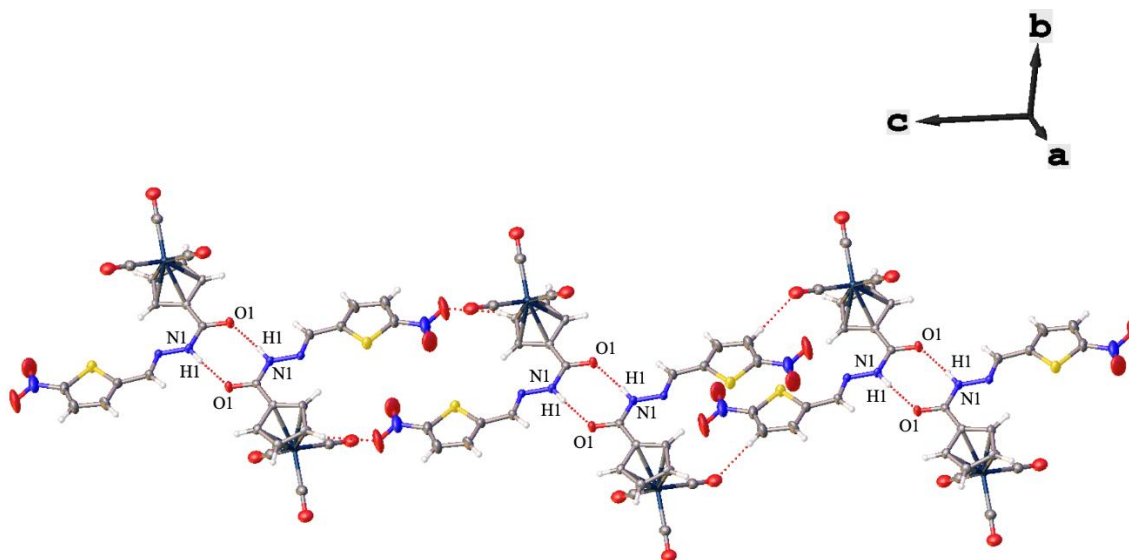

**Figure S15.** Crystal packing and the hydrogen bond N1–H1···O1 (-x, -y, 1-z) in **4b**. Donor-Acceptor distance (Å): N1–H1···O1, 2.884(5); C11–H11···O5, 3.360(8).

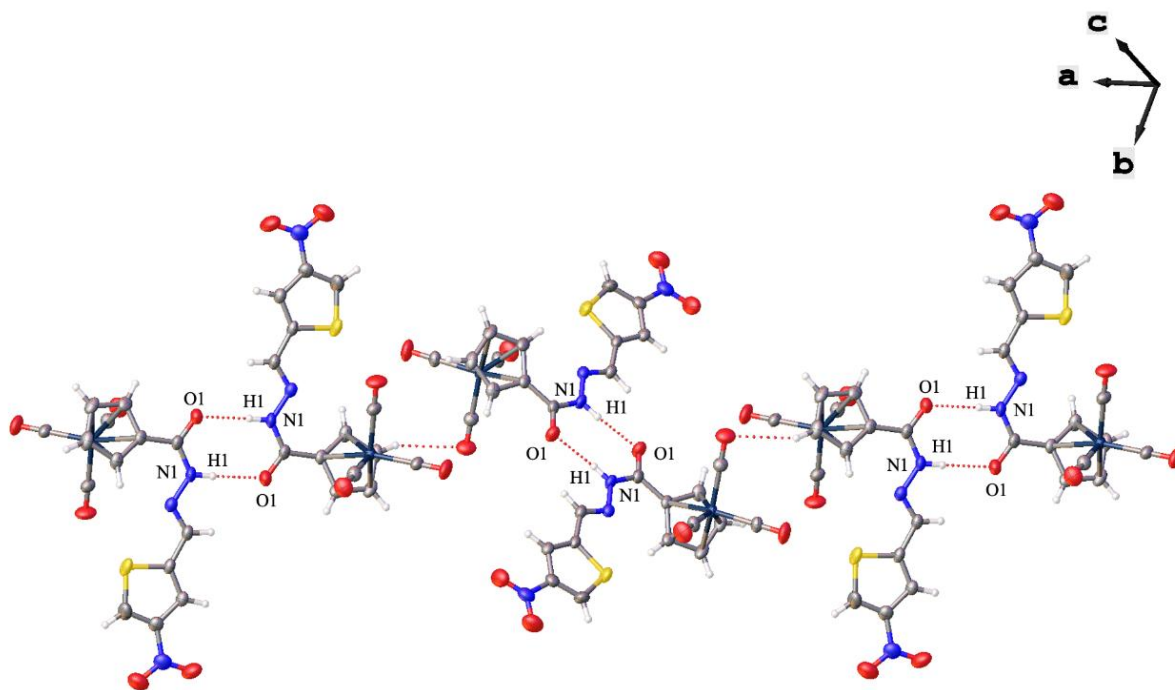

**Figure S16.** Crystal packing and the hydrogen bond N1–H1···O1 (1-x, 2-y, 2-z) in **5b**. Donor-Acceptor distance (Å): N1–H1···O1, 2.912(9); C11–H11···O5, 3.330(12).

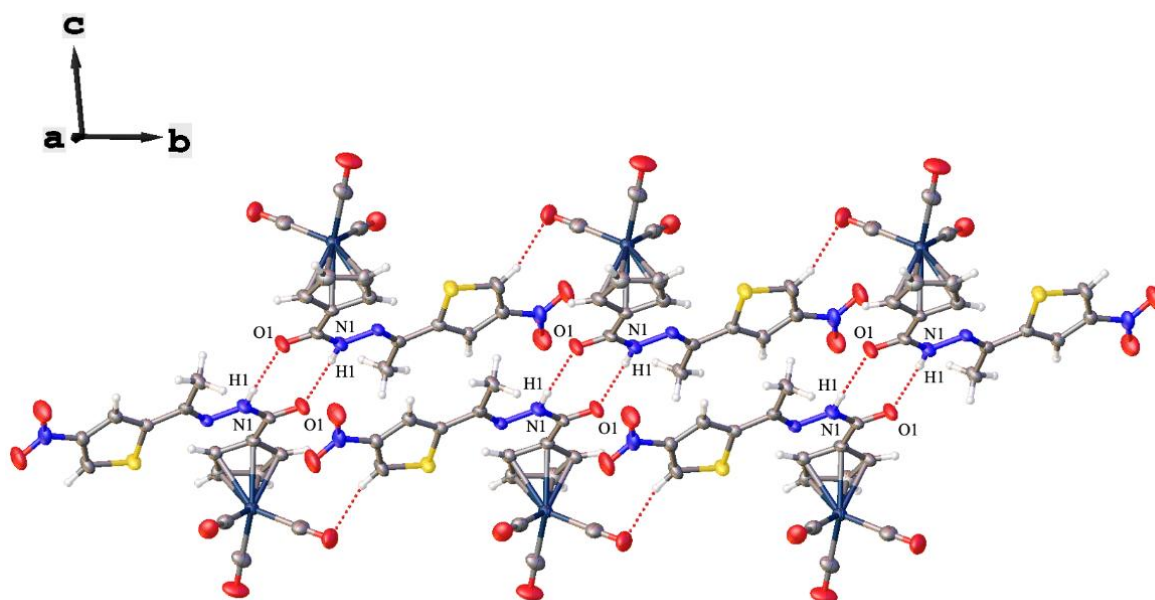

**Figure S17.** UV-Vis spectra of a freshly prepared solution of **4a** in a DMSO:Buffer solution (20:80) were recorded every 3 h up to 24 h and are shown in **A**. To facilitate visualization, a selection of those obtained at  $t = 0, 12,$  and  $24$  h is presented in **B**.

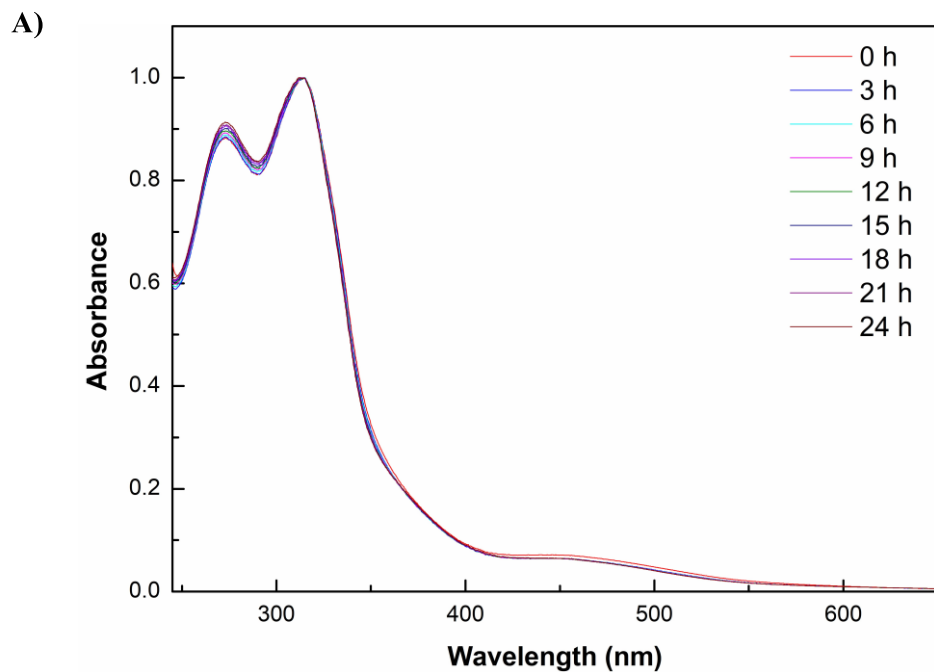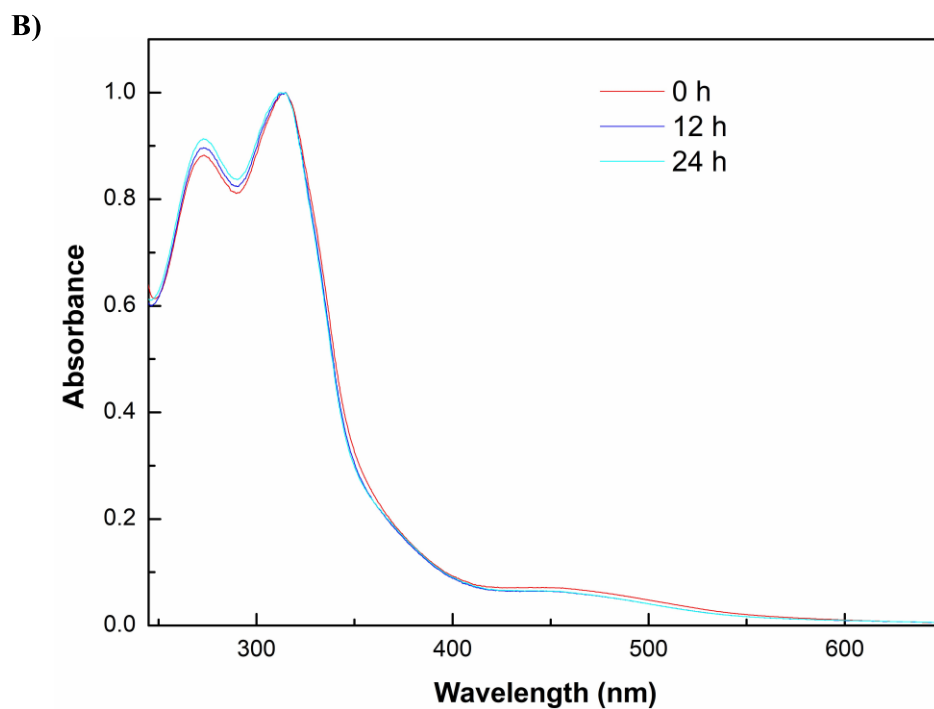

**Figure S18.** UV-Vis spectra of a freshly prepared solution of **5a** in a DMSO:Buffer solution (20:80) were recorded every 3 h up to 24 h and are shown in **A**. To facilitate visualization, a selection of those obtained at  $t = 0, 12,$  and  $24$  h is presented in **B**.

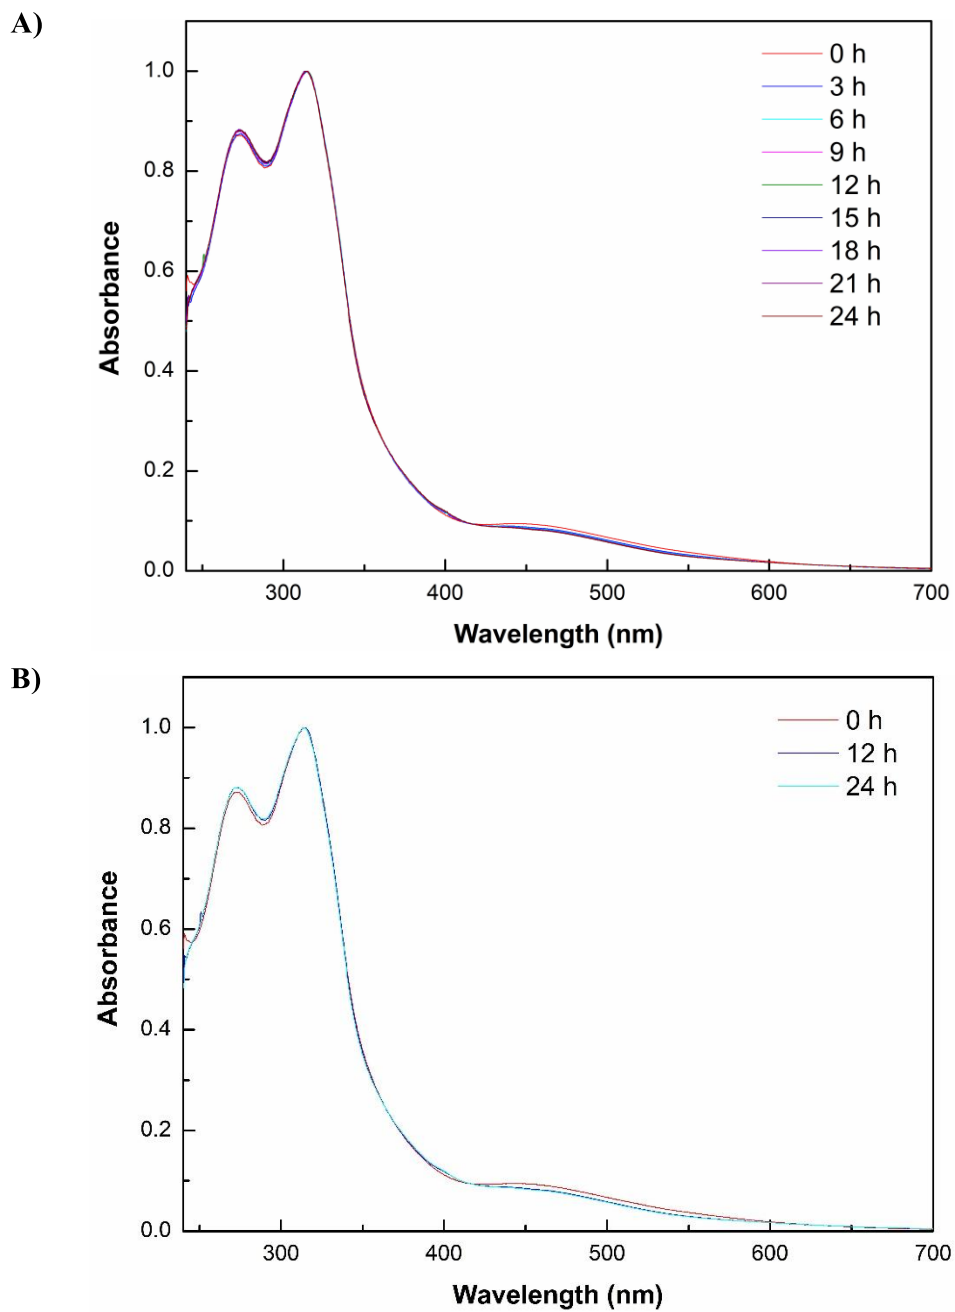

**Figure S19.** UV-Vis spectra of a freshly prepared solution of **6a** in a DMSO:Buffer solution (20:80) were recorded every 3 h up to 24 h and are shown in **A**. To facilitate visualization, a selection of those obtained at  $t = 0, 12,$  and  $24$  h is presented in **B**.

**A)**

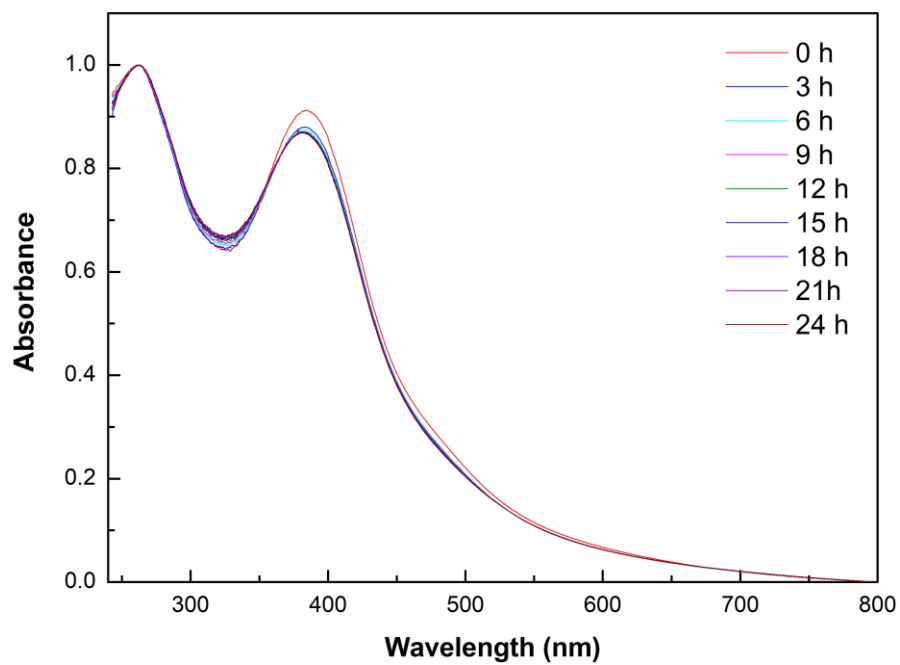

**B)**

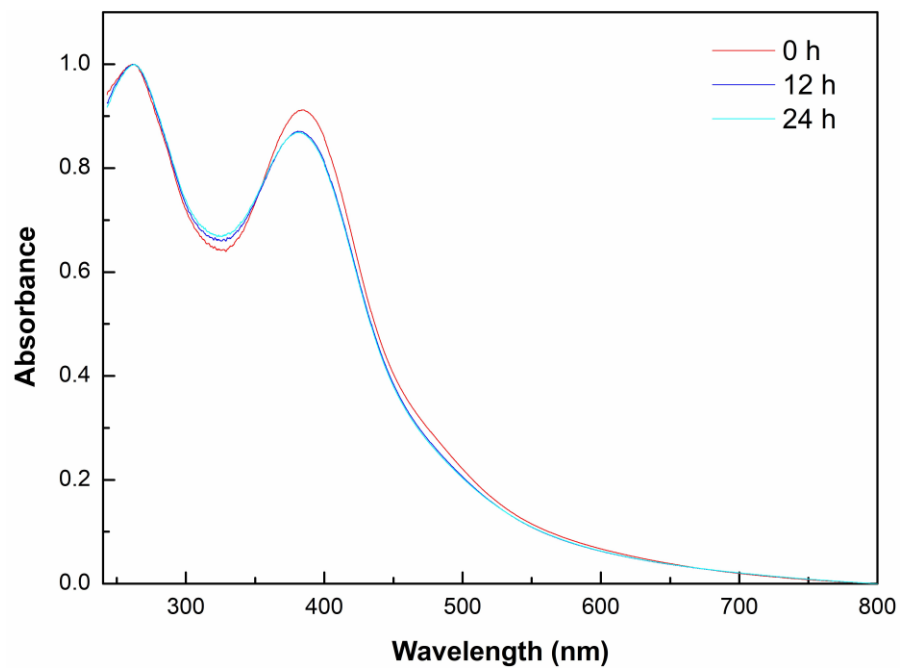

**Figure S20.** UV-Vis spectra of a freshly prepared solution of **7a** in a DMSO:Buffer solution (20:80) were recorded every 3 h up to 24 h and are shown in **A**. To facilitate visualization, a selection of those obtained at  $t = 0, 12,$  and  $24$  h is presented in **B**.

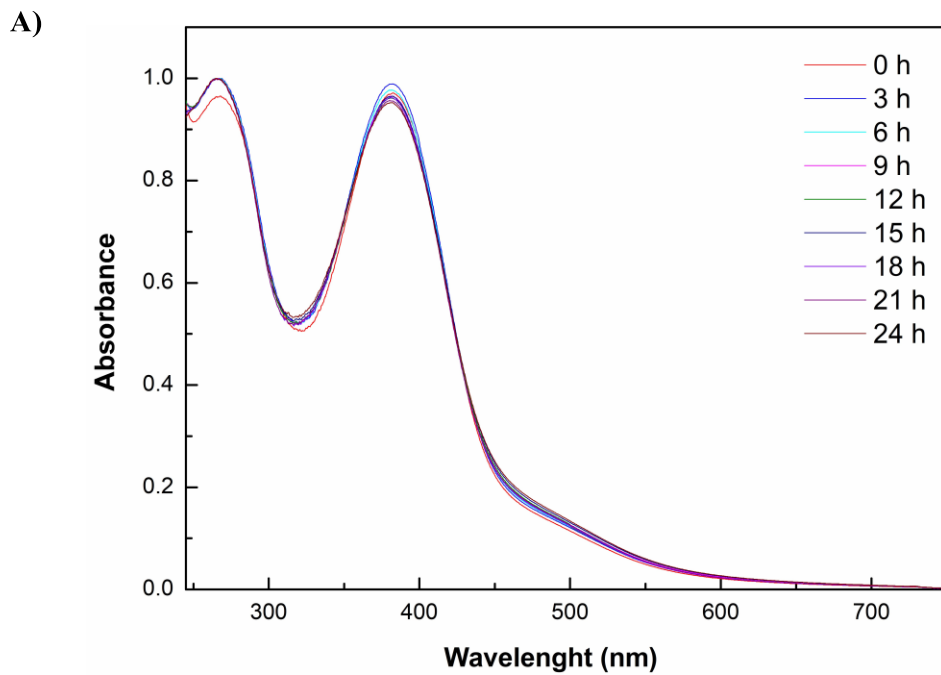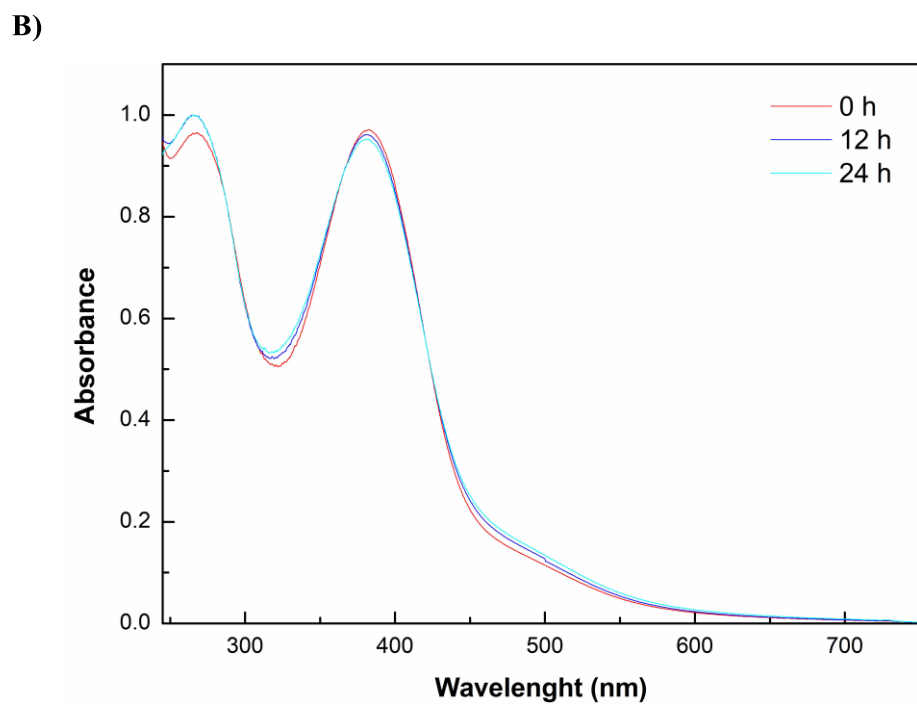

**Figure S21.** UV-Vis spectra of a freshly prepared solution of **4b** in a DMSO:Buffer solution (20:80) were recorded every 3 h up to 24 h and are shown in **A**. To facilitate visualization, a selection of those obtained at  $t = 0, 12,$  and  $24$  h is presented in **B**.

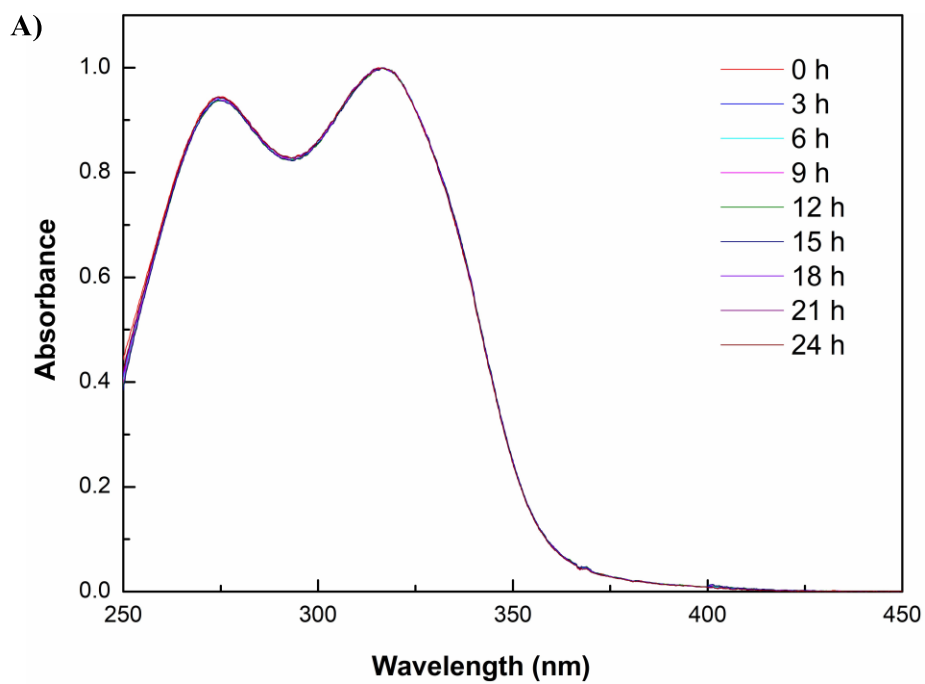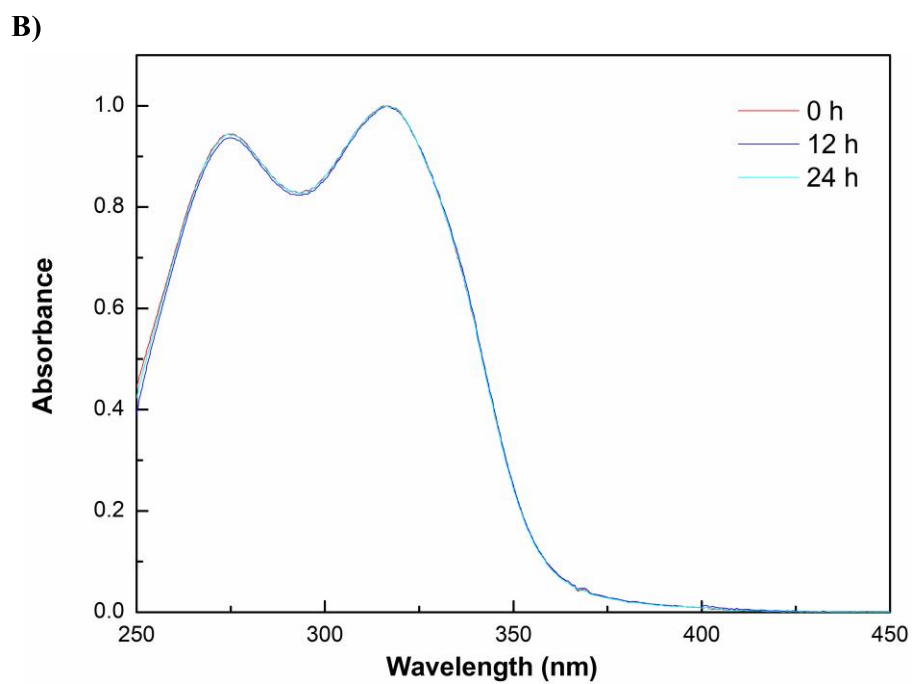

**Figure S22.** UV-Vis spectra of a freshly prepared solution of **5b** in a DMSO:Buffer solution (20:80) were recorded every 3 h up to 24 h and are shown in **A**. To facilitate visualization, a selection of those obtained at  $t = 0, 12,$  and  $24$  h is presented in **B**.

**A)**

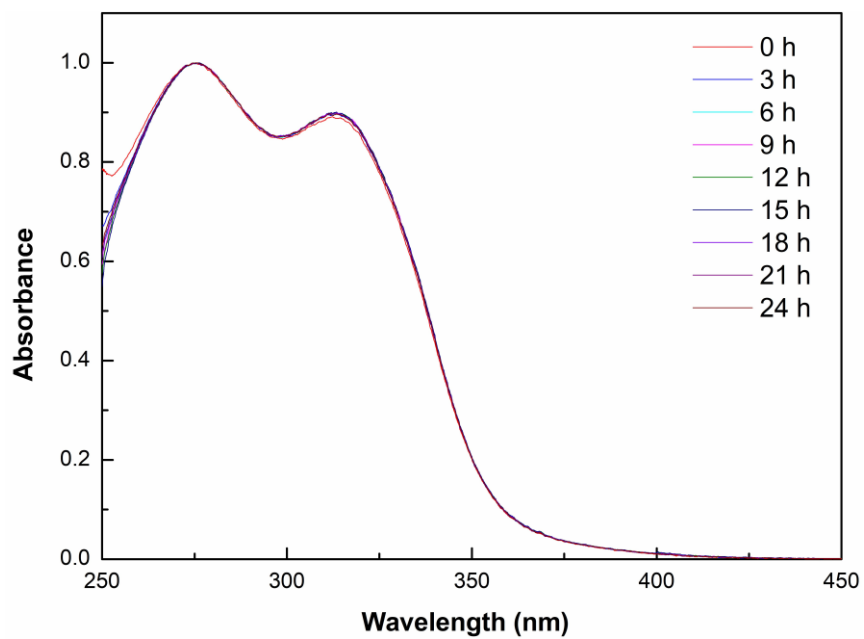

**B)**

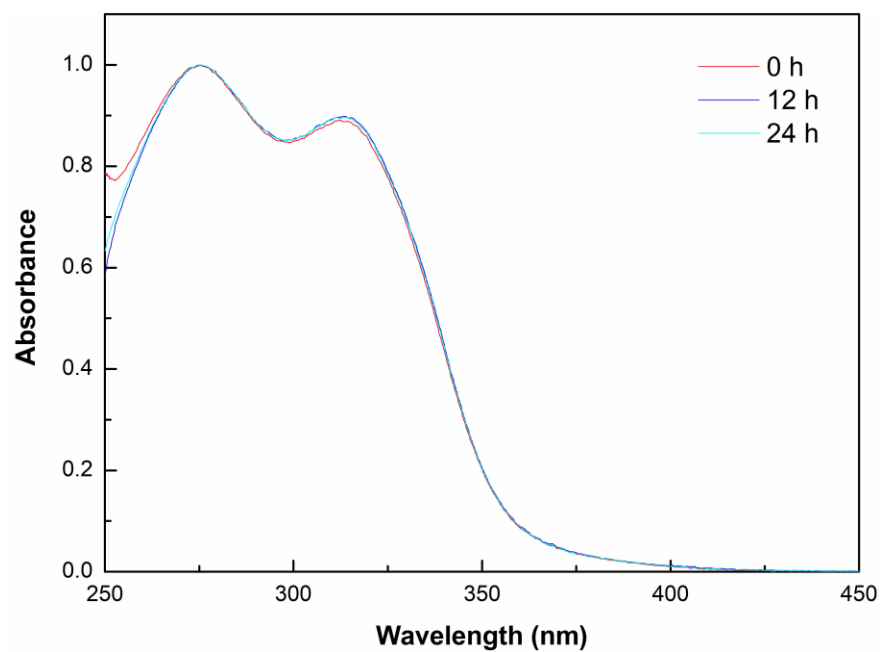

**Figure S23.** UV-Vis spectra of a freshly prepared solution of **6b** in a DMSO:Buffer solution (20:80) were recorded every 3 h up to 24 h and are shown in **A**. To facilitate visualization, a selection of those obtained at  $t = 0, 12,$  and  $24$  h is presented in **B**.

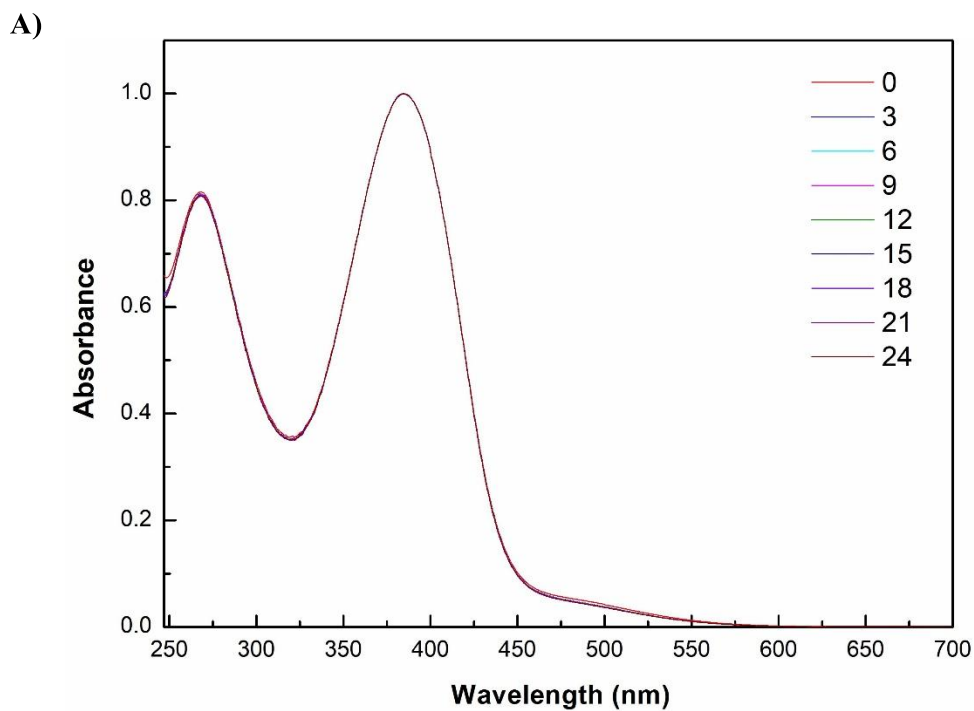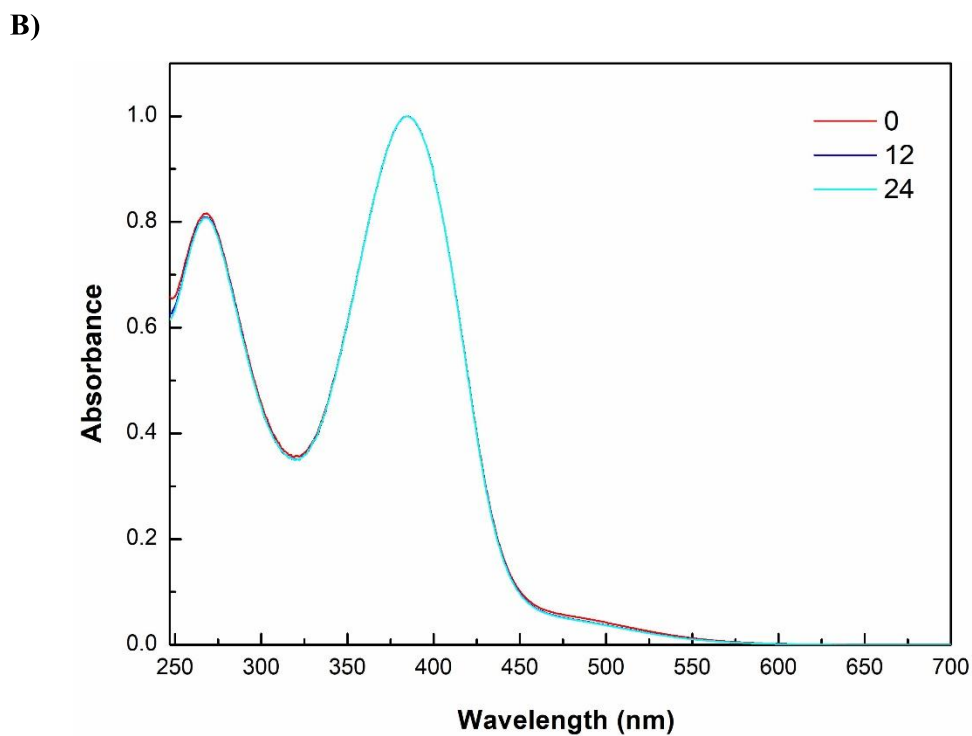

**Figure S24.** UV-Vis spectra of a freshly prepared solution of **7b** in a DMSO:Buffer solution (20:80) were recorded every 3 h up to 24 h and are shown in **A**. To facilitate visualization, a selection of those obtained at  $t = 0, 12,$  and  $24$  h is presented in **B**.

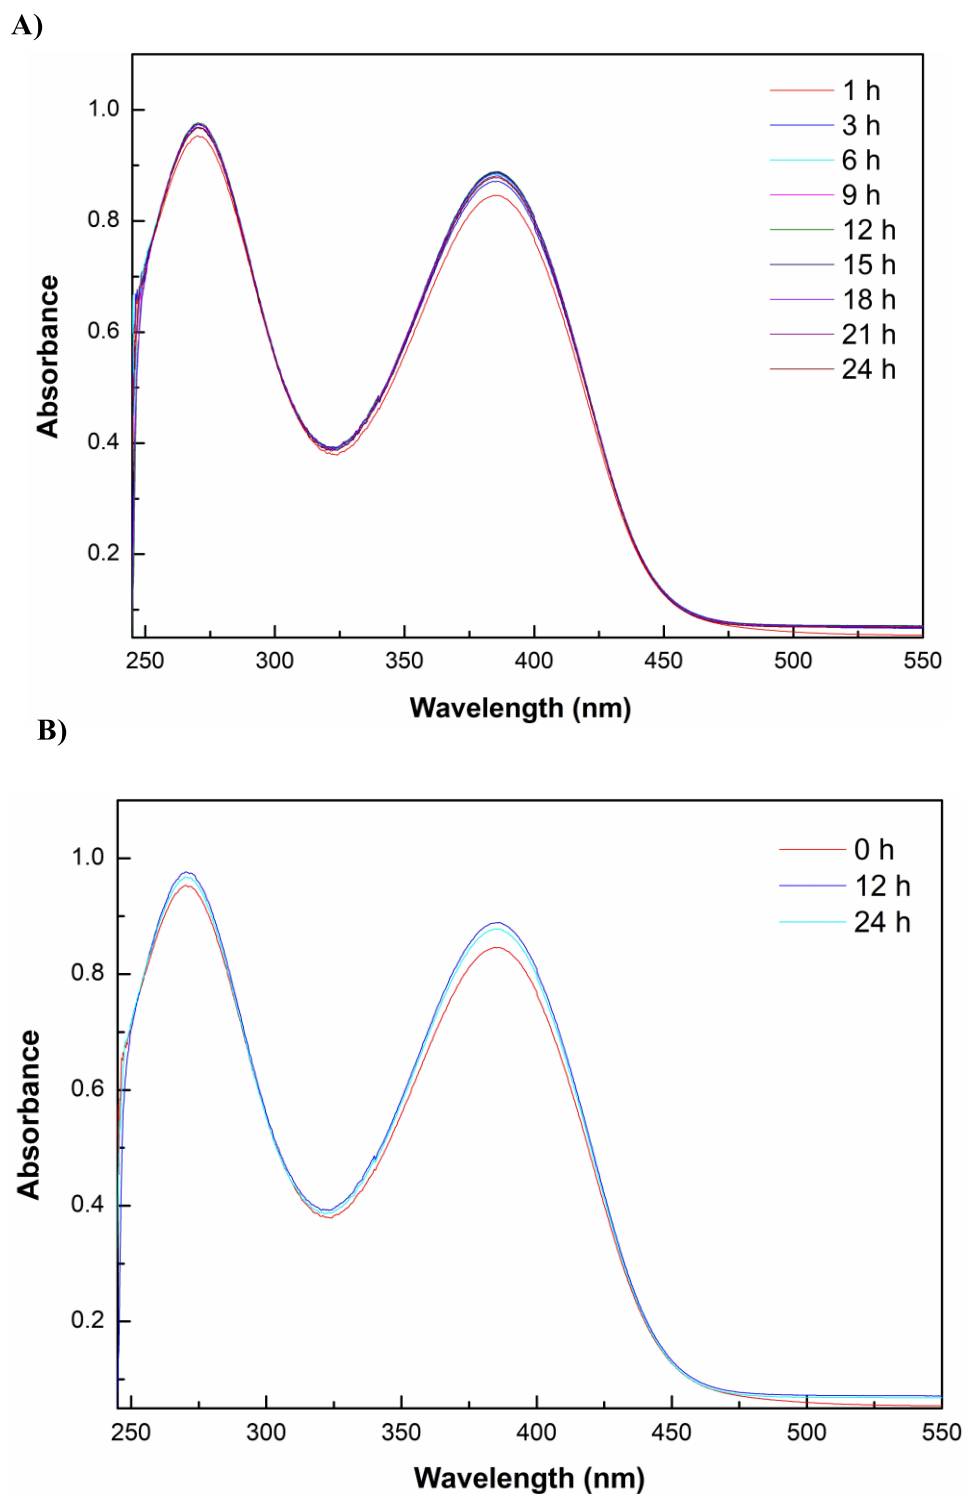

Figure S25.  $^1\text{H-NMR}$  spectrum (300 MHz) of compound **4a** in  $\text{DMSO-}d_6$ .

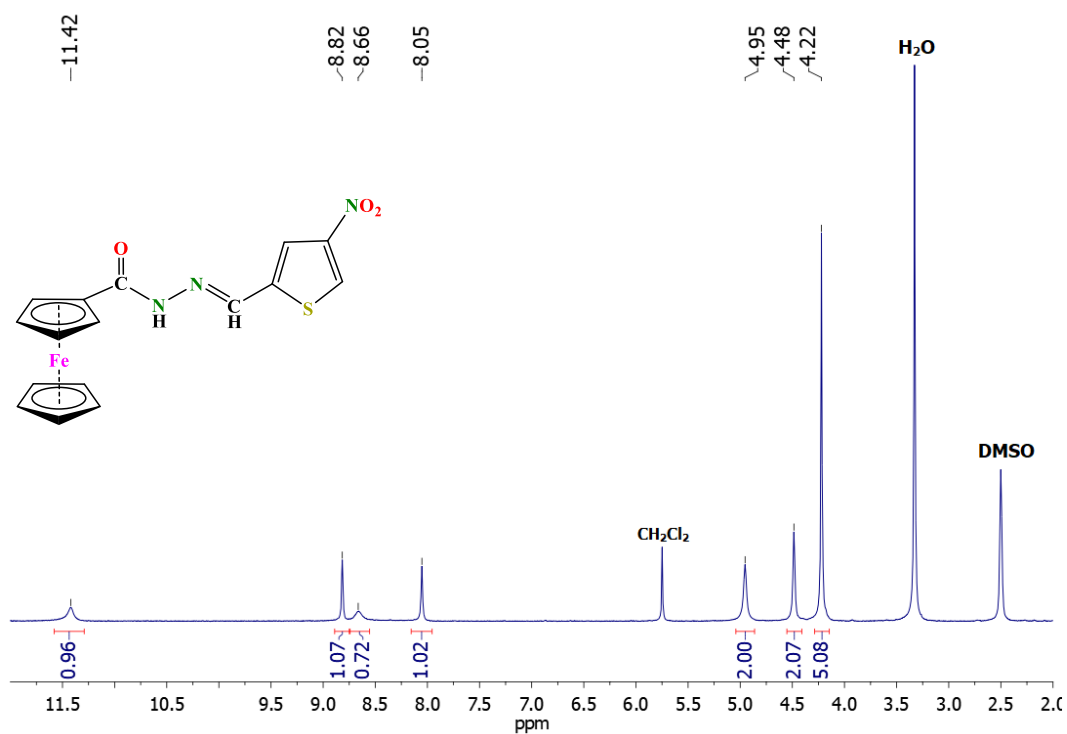

Figure S26.  $^1\text{H-NMR}$  spectrum (300 MHz) of compound **5a** in  $\text{DMSO-}d_6$ .

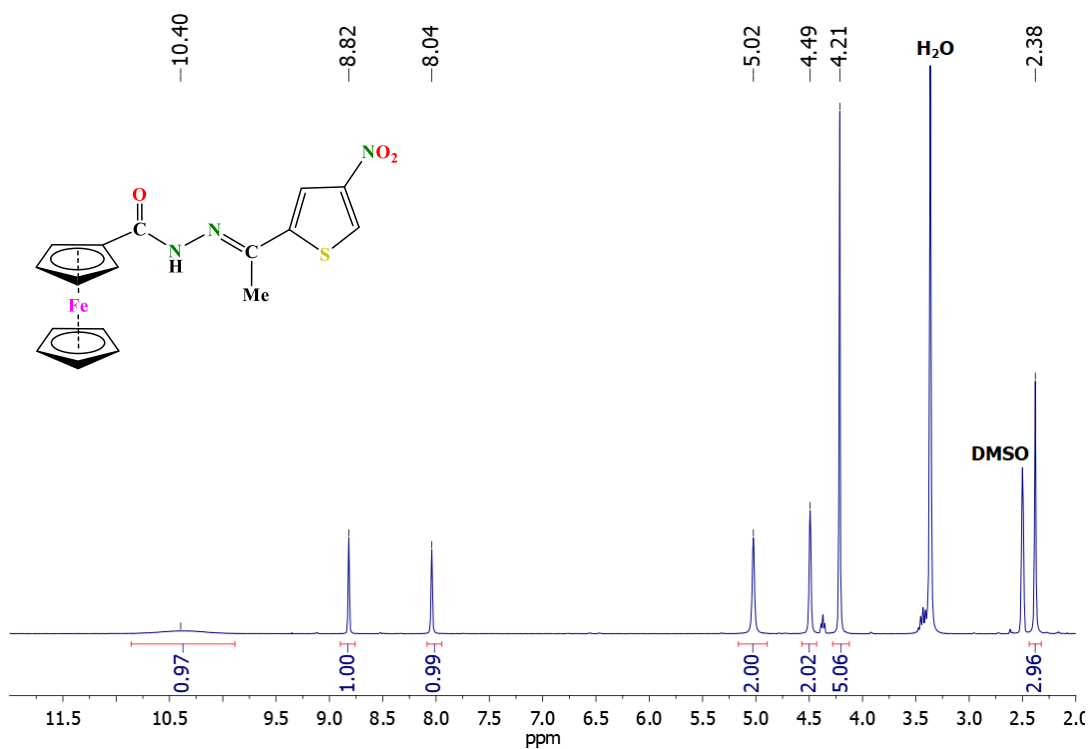

Figure S27. <sup>1</sup>H-NMR spectrum (300 MHz) of compound **6a** in DMSO-*d*<sub>6</sub>.

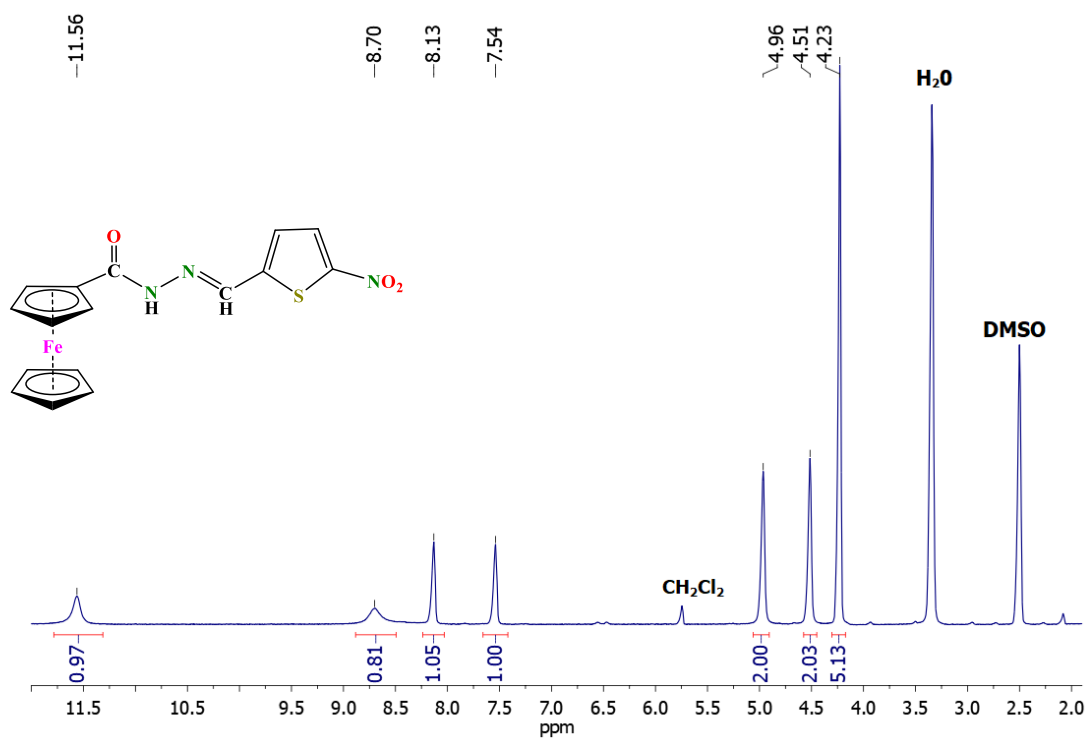

Figure S28. <sup>1</sup>H-NMR spectrum (300 MHz) of compound **7a** in DMSO-*d*<sub>6</sub>.

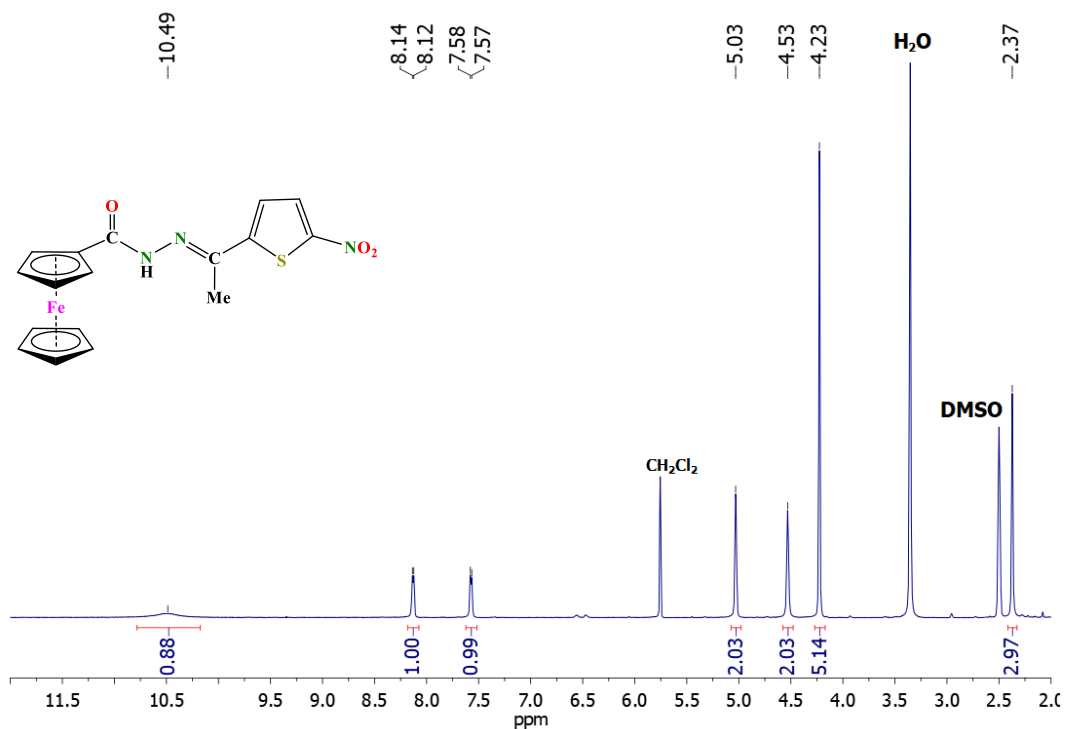

**Figure S29.**  $^1\text{H-NMR}$  spectrum (300 MHz) of compound **4b** in  $\text{DMSO-}d_6$ .

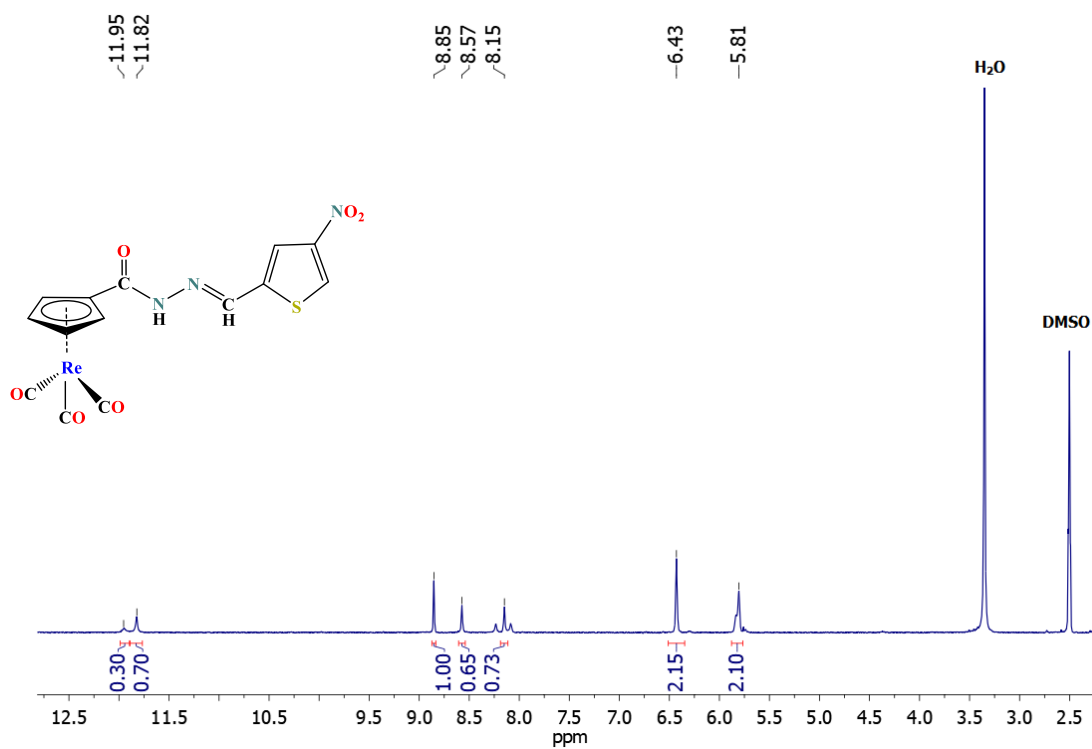

**Figure S30.**  $^1\text{H-NMR}$  spectrum (300 MHz) of compound **5b** in  $\text{DMSO-}d_6$ .

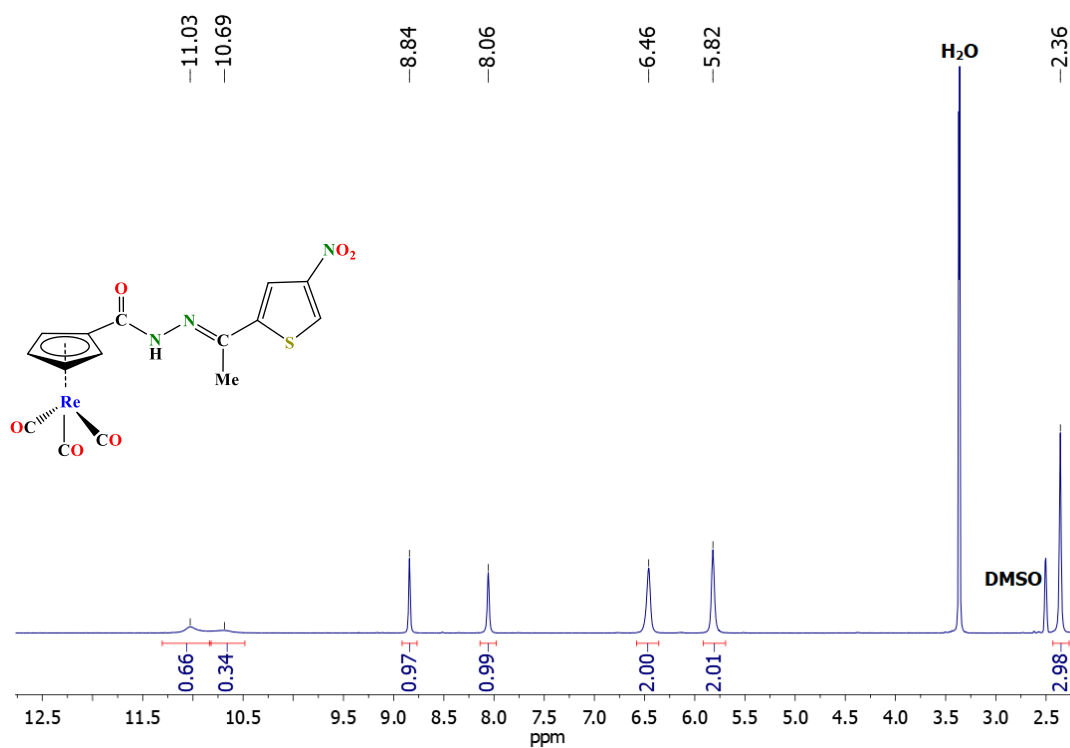

**Figure S31.**  $^1\text{H-NMR}$  spectrum (300 MHz) of compound **6b** in  $\text{DMSO-}d_6$ .

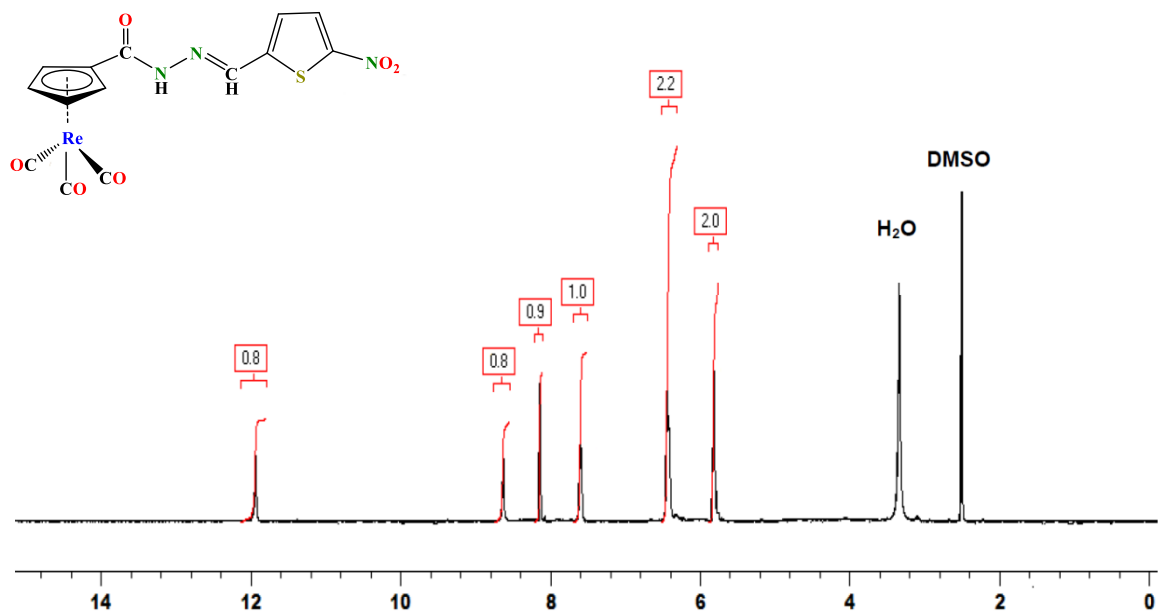

**Figure S32.**  $^1\text{H-NMR}$  spectrum (300 MHz) of compound **7b** in  $\text{DMSO-}d_6$ .

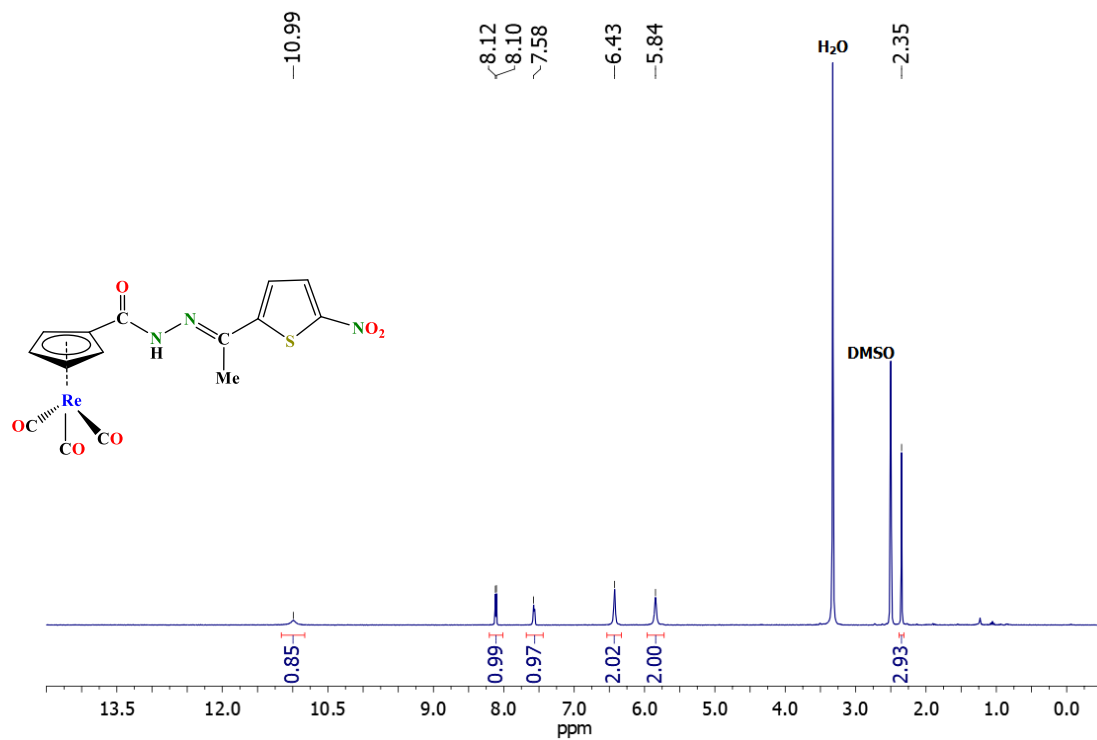

**Figure S33.**  $^1\text{H}$  NMR spectrum (400 MHz) of compound **4c** in  $\text{DMSO-}d_6$ .

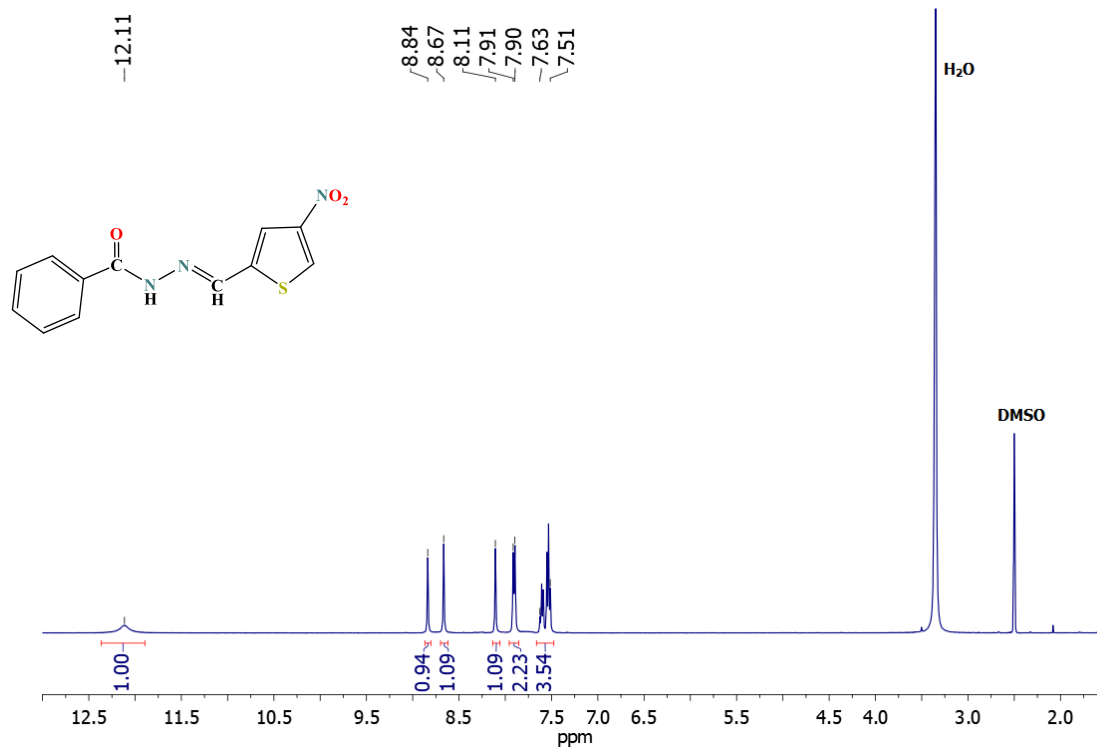

**Figure S34.**  $^1\text{H}$  NMR spectrum (400 MHz) of compound **5c** in  $\text{DMSO-}d_6$ .

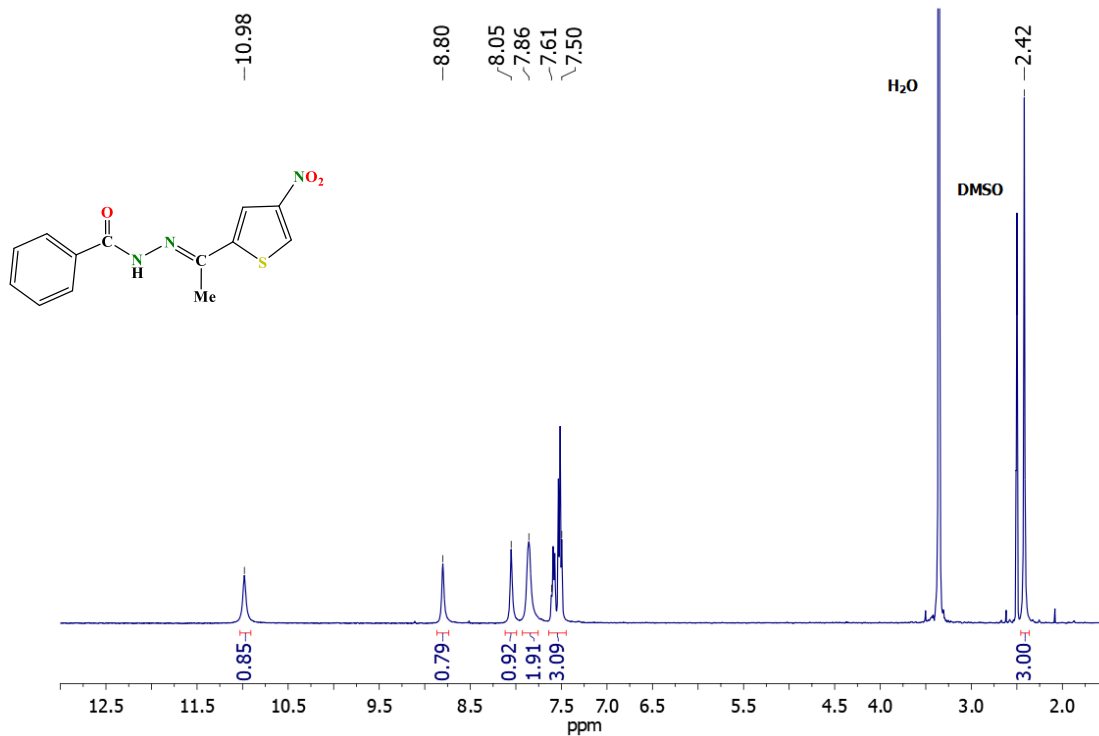

**Figure S35.**  $^1\text{H}$  NMR spectrum (400 MHz) of compound **6c** in  $\text{DMSO-}d_6$ . The inserted plot shows an expansion of the region 8.0 – 7.5 ppm.

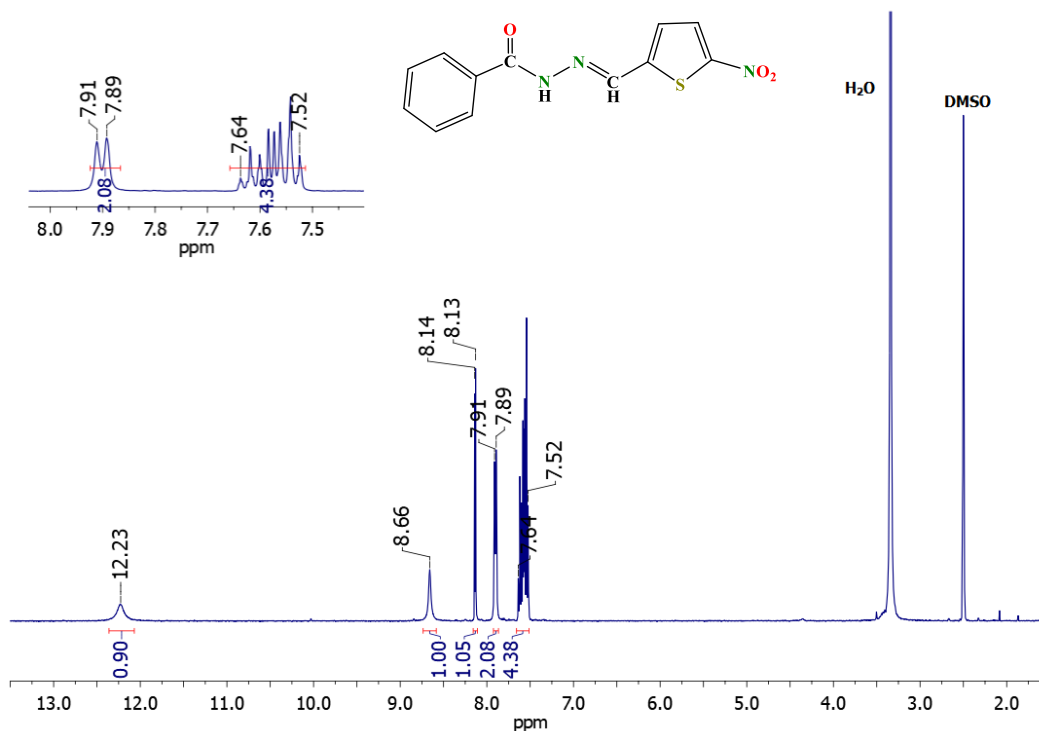

**Figure S36.**  $^1\text{H}$  NMR spectrum (400 MHz) of compound **7c** in  $\text{DMSO-}d_6$ . The inserted plot shows an expansion of the region 8.0 – 7.4 ppm.

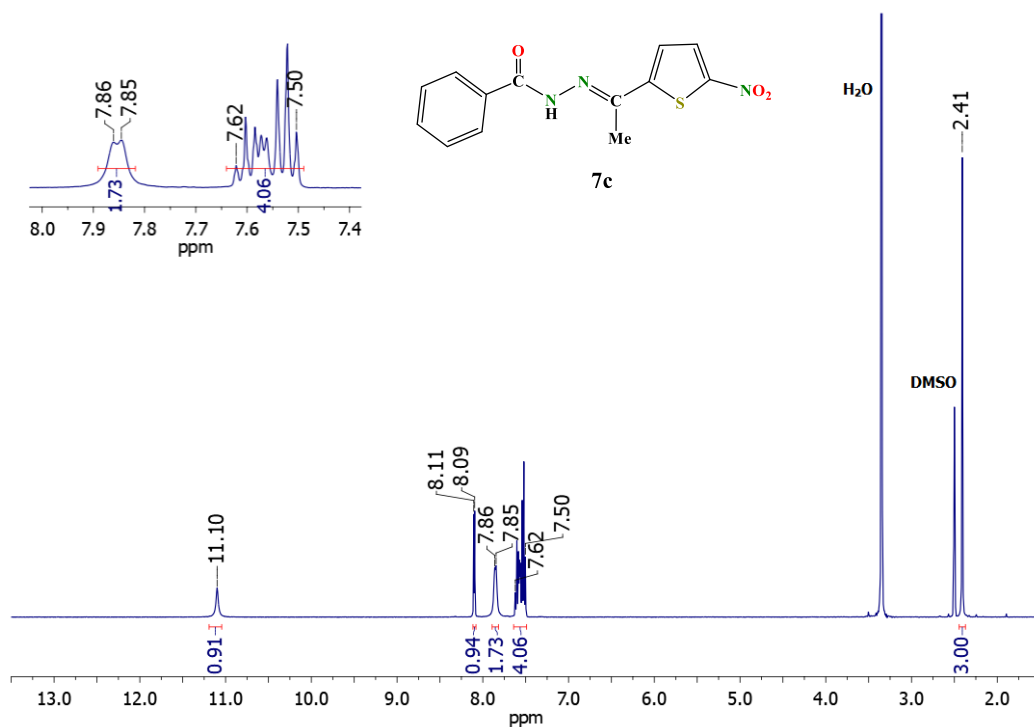

**Figure S37.** [ $^1\text{H}$ - $^1\text{H}$ ] NOESY spectrum (400 MHz) of compound **4a** in  $\text{DMSO-}d_6$ .

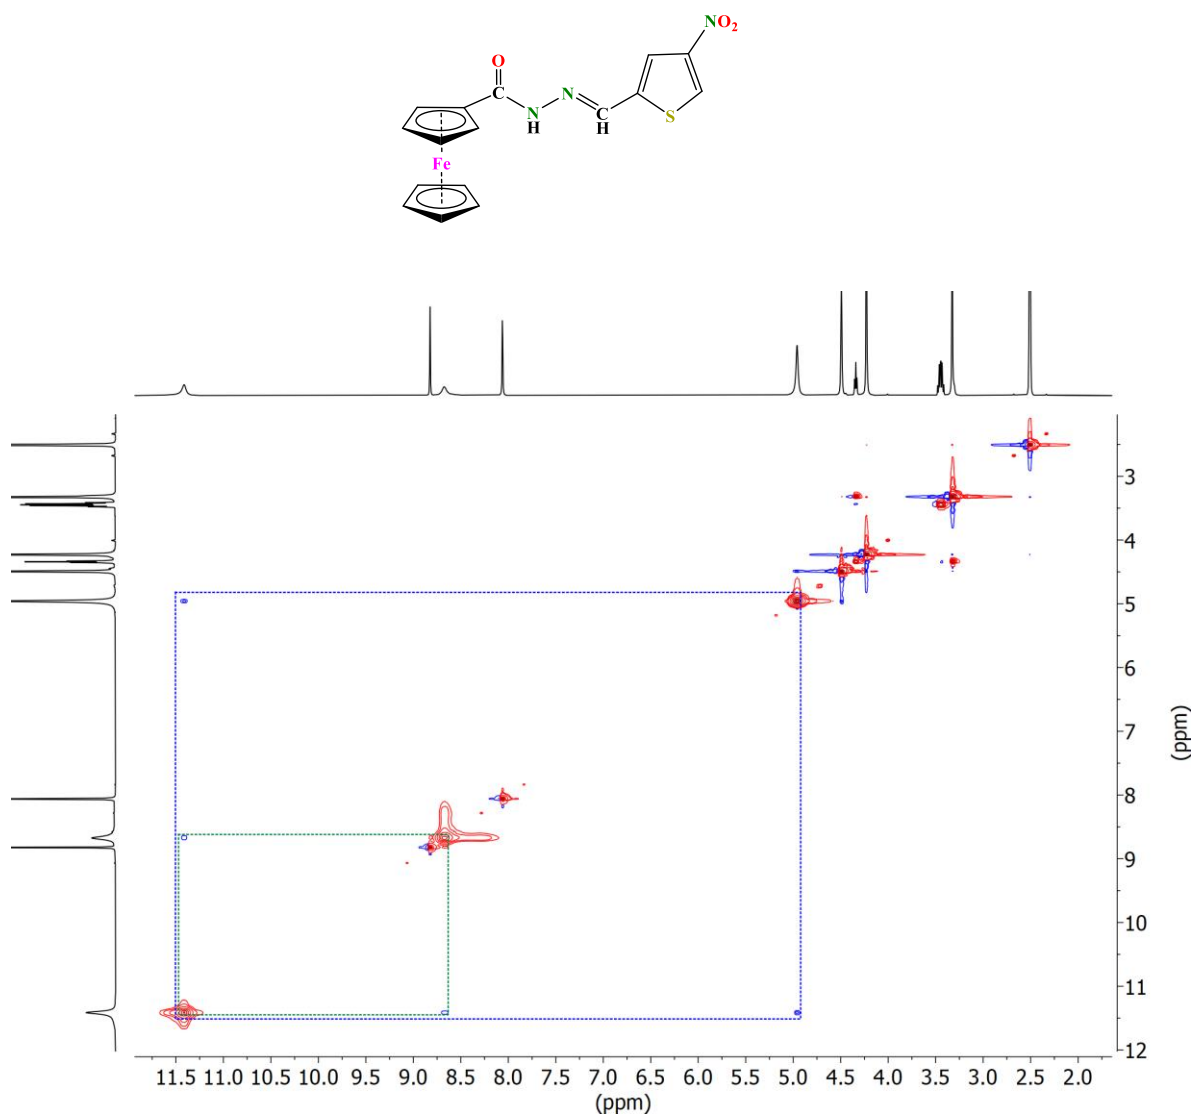

**Figure S38.**  $^1\text{H-NMR}$  spectra (400 MHz) of complex **4b** in  $\text{DMSO-}d_6$  registered at variable temperatures (300 to 340 K).

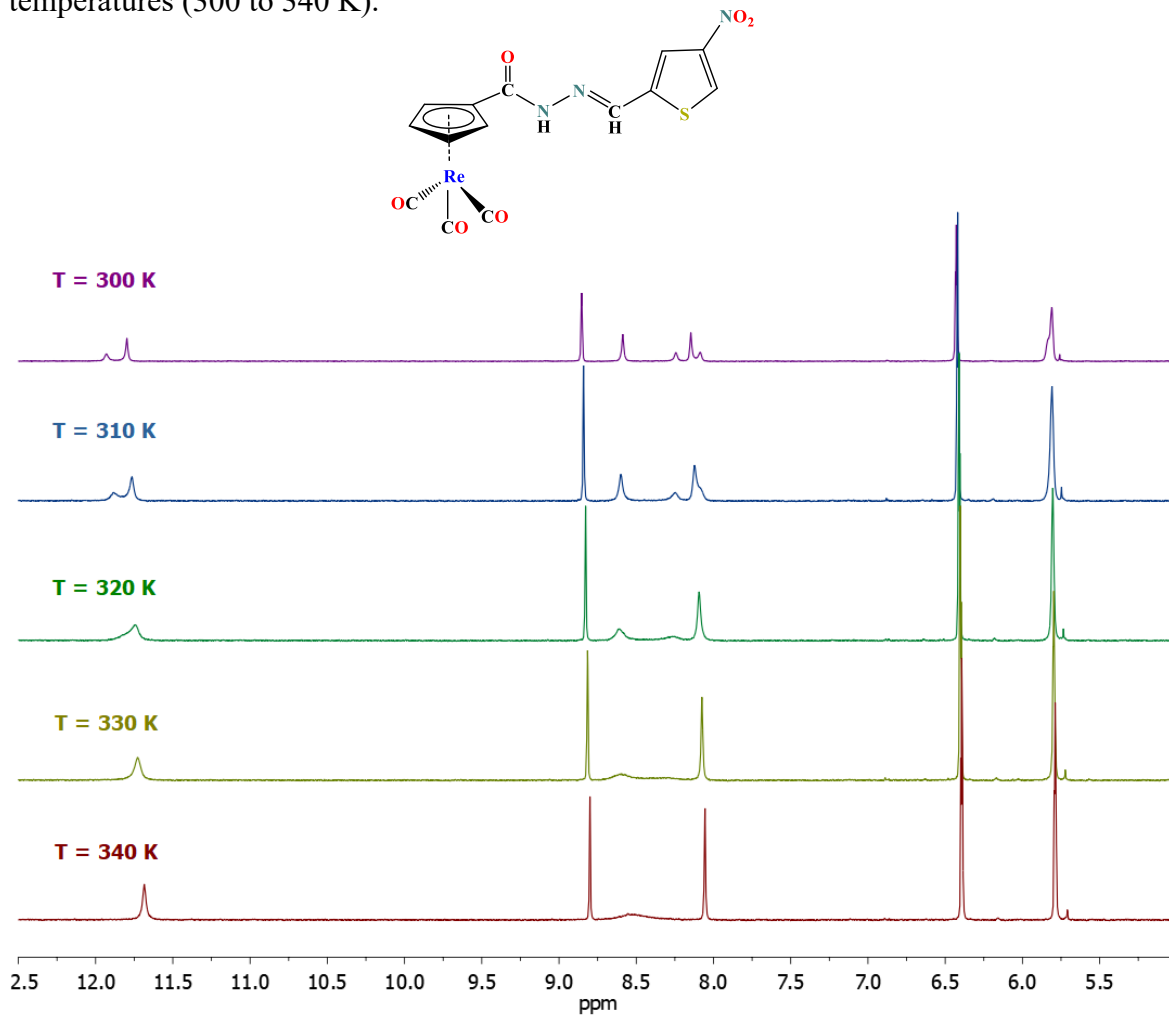

**Figure S39.** Zoom-in of the NH and aromatic region of the  $^1\text{H}$ -NMR spectra (400 MHz) of **4b** recorded at different temperatures (300 to 340 K).

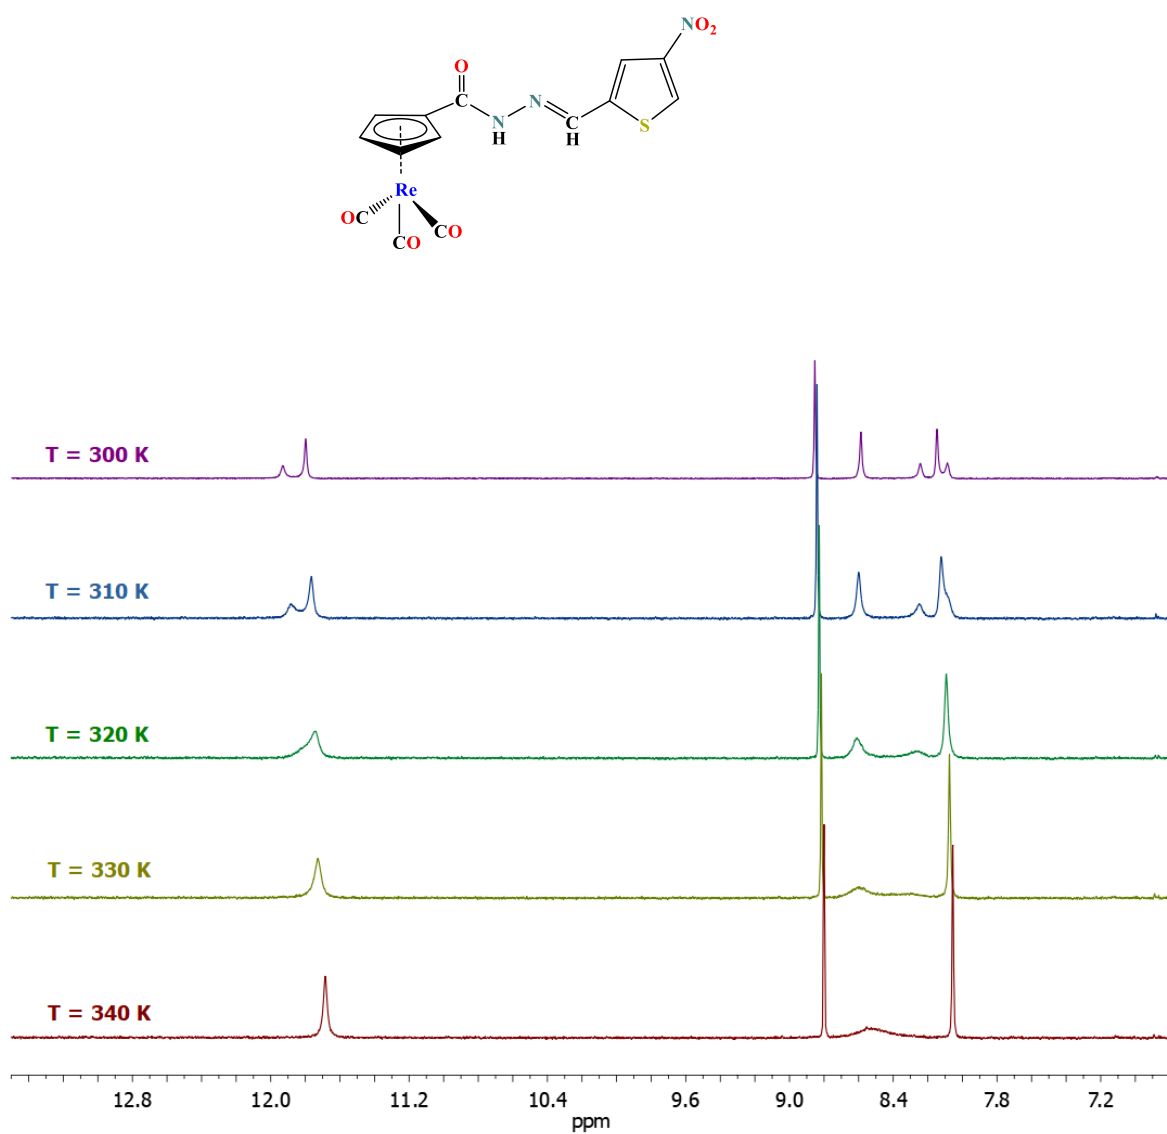

**Figure S40.** Cyclic voltammograms of **4a** at different scan rates of 0.1 – 2.00 V s<sup>-1</sup> in DMSO (TBAP 0.1 M, HMDE, Pt, non-aqueous Ag/AgCl).

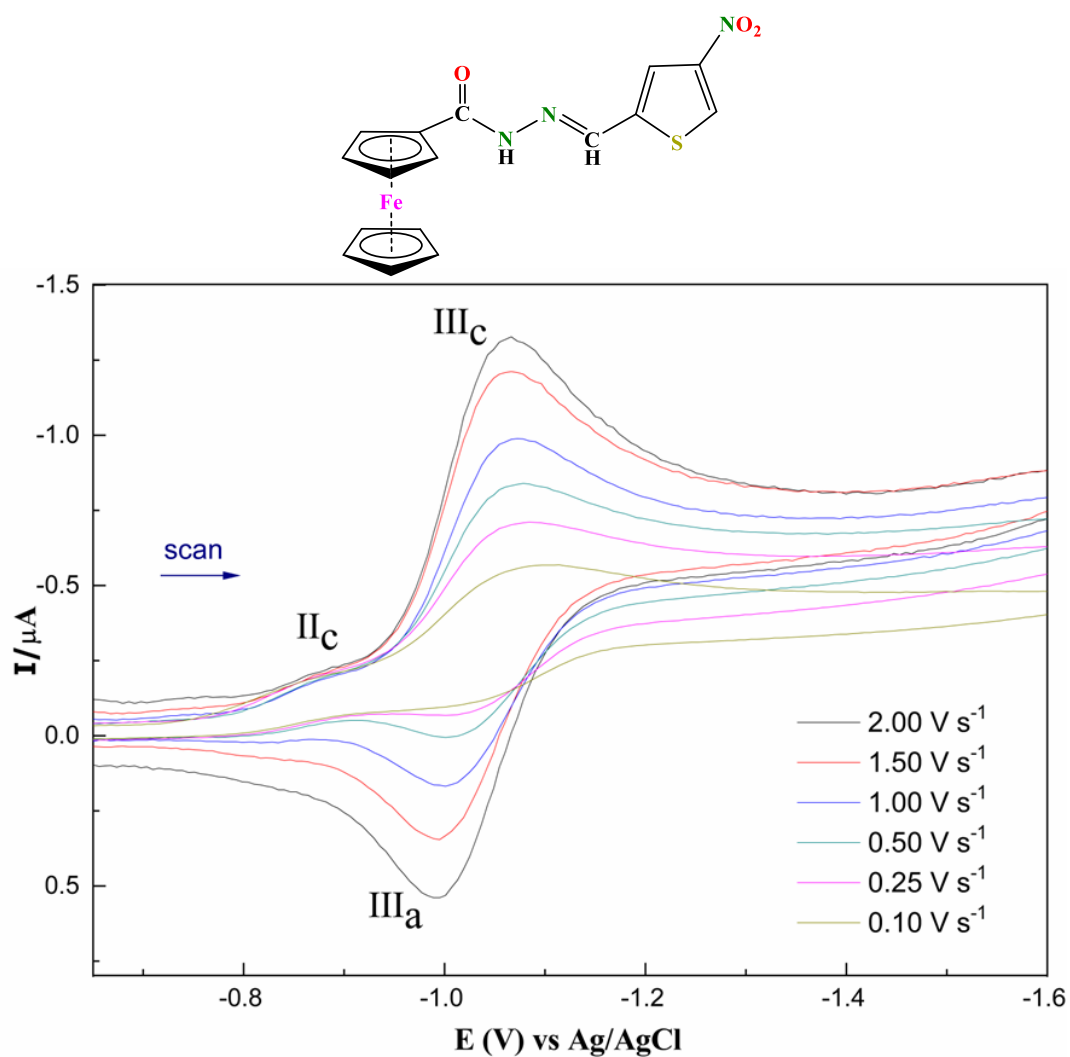

**Figure S41.** Cyclic voltammograms of **4b** at different scan rates of 0.1 – 2.00 V s<sup>-1</sup> in DMSO (TBAP 0.1 M, HMDE, Pt, non-aqueous Ag/AgCl).

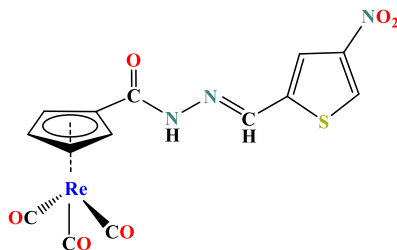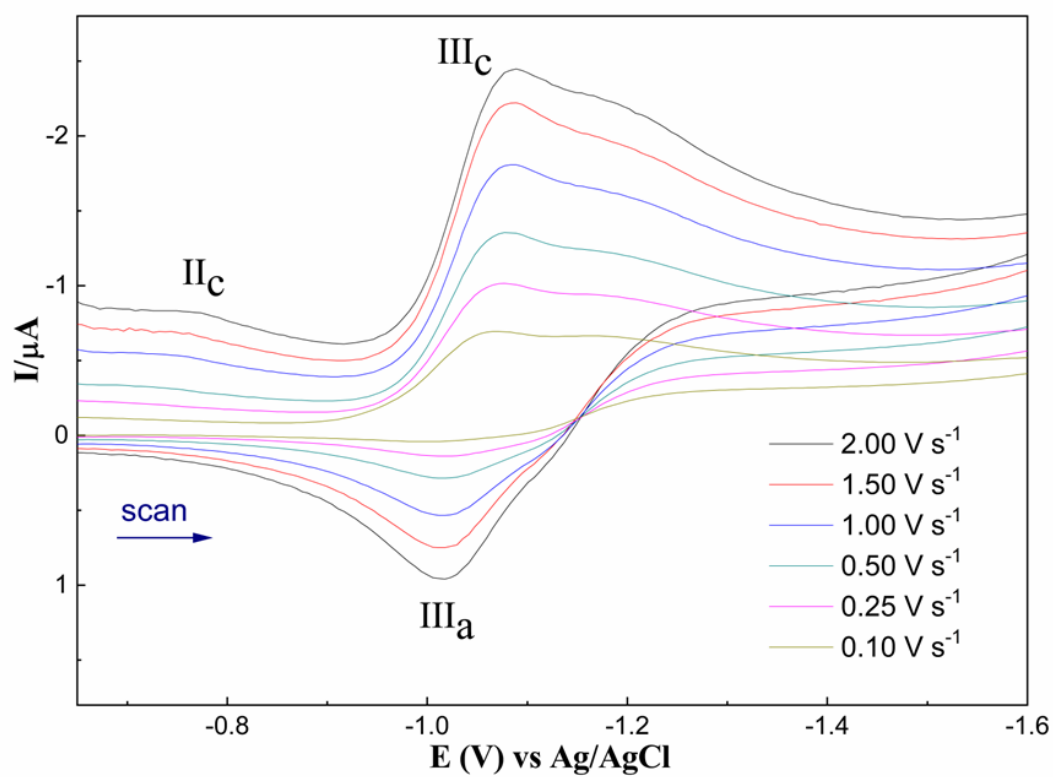

**Figure S42.** Cyclic voltammograms of **5a** at different scan rates of 0.1 – 2.00 V s<sup>-1</sup> in DMSO (TBAP 0.1 M, HMDE, Pt, non-aqueous Ag/AgCl).

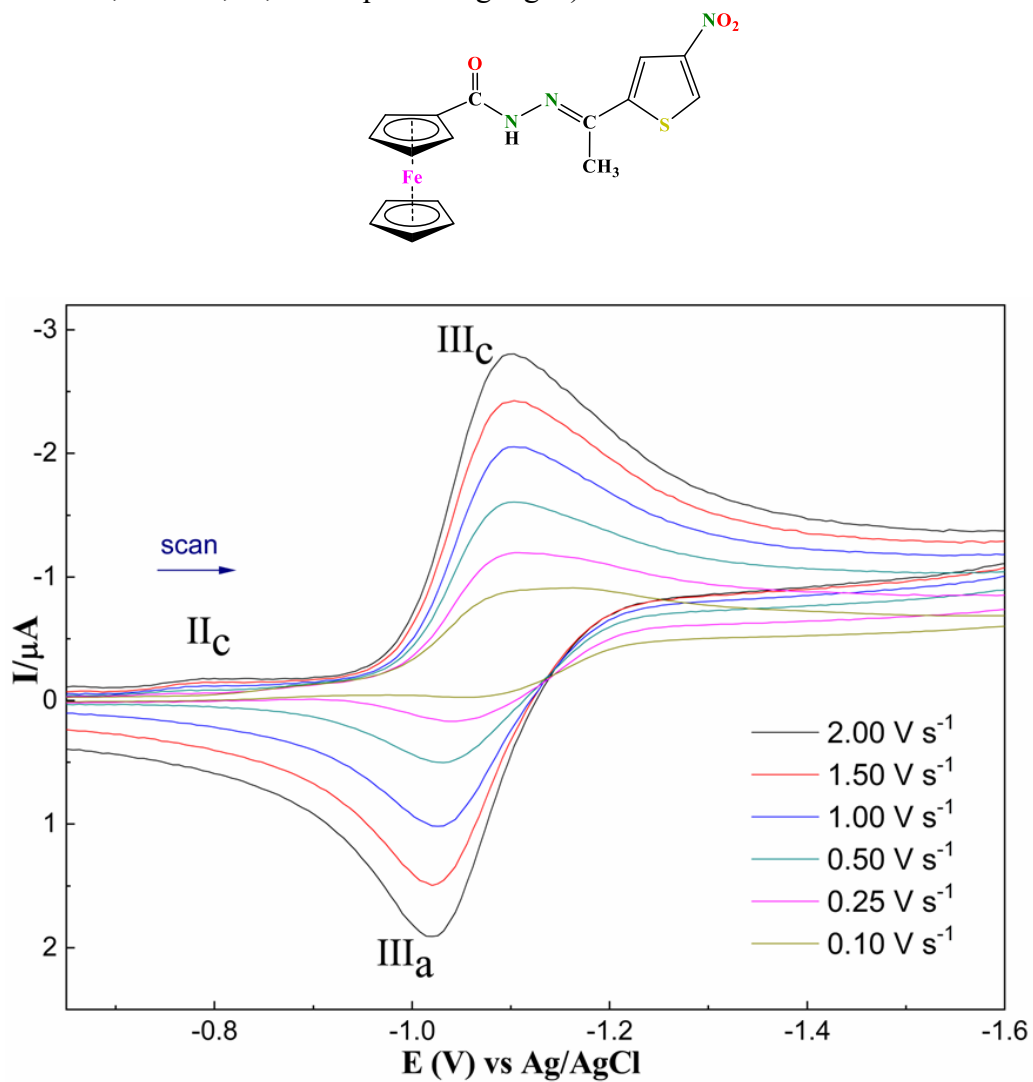

**Figure S43.** Cyclic voltammograms of **6a** at different scan rates of 0.1 – 2.00 V s<sup>-1</sup> in DMSO (TBAP 0.1 M, HMDE, Pt, non-aqueous Ag/AgCl).

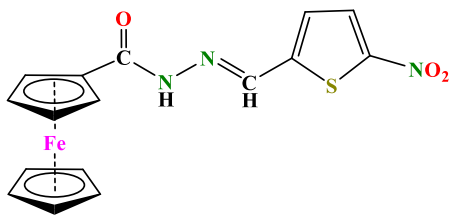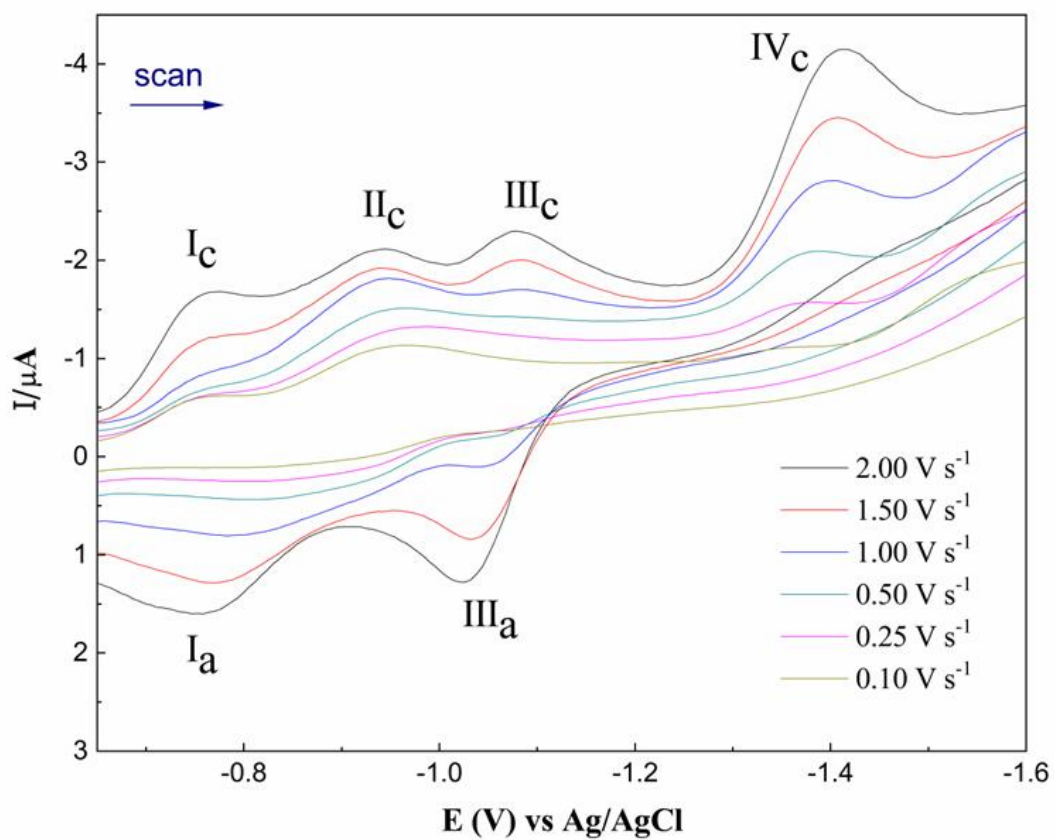

**Figure S44.** Cyclic voltammograms of **7a** at different scan rates of 0.1 – 2.00 V s<sup>-1</sup> in DMSO (TBAP 0.1 M, HMDE, Pt, non-aqueous Ag/AgCl).

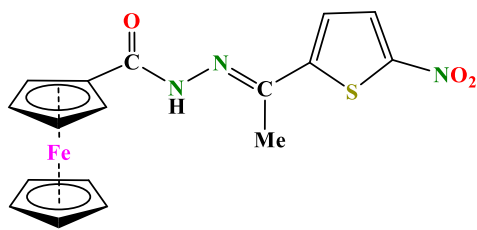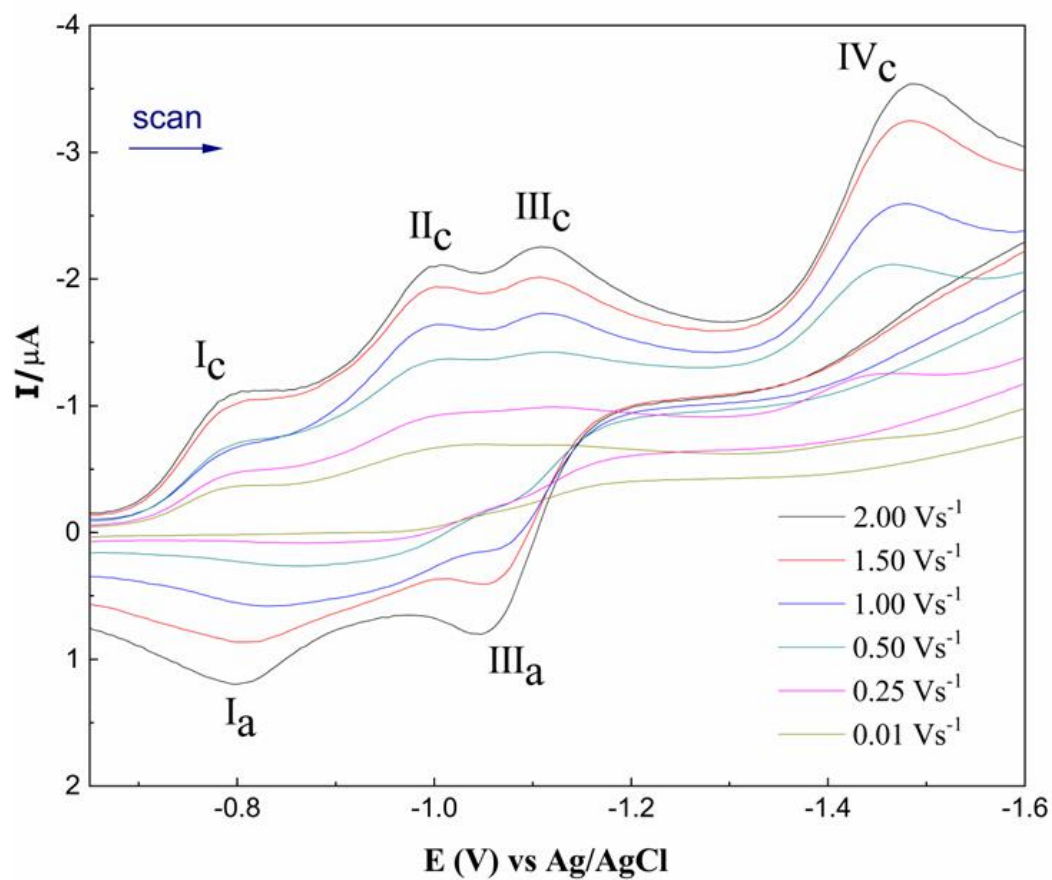

**Figure S45.** Cyclic voltammograms of **7b** at different scan rates of 0.1 – 2.00 V s<sup>-1</sup> in DMSO (TBAP 0.1 M, HMDE, Pt, non-aqueous Ag/AgCl).

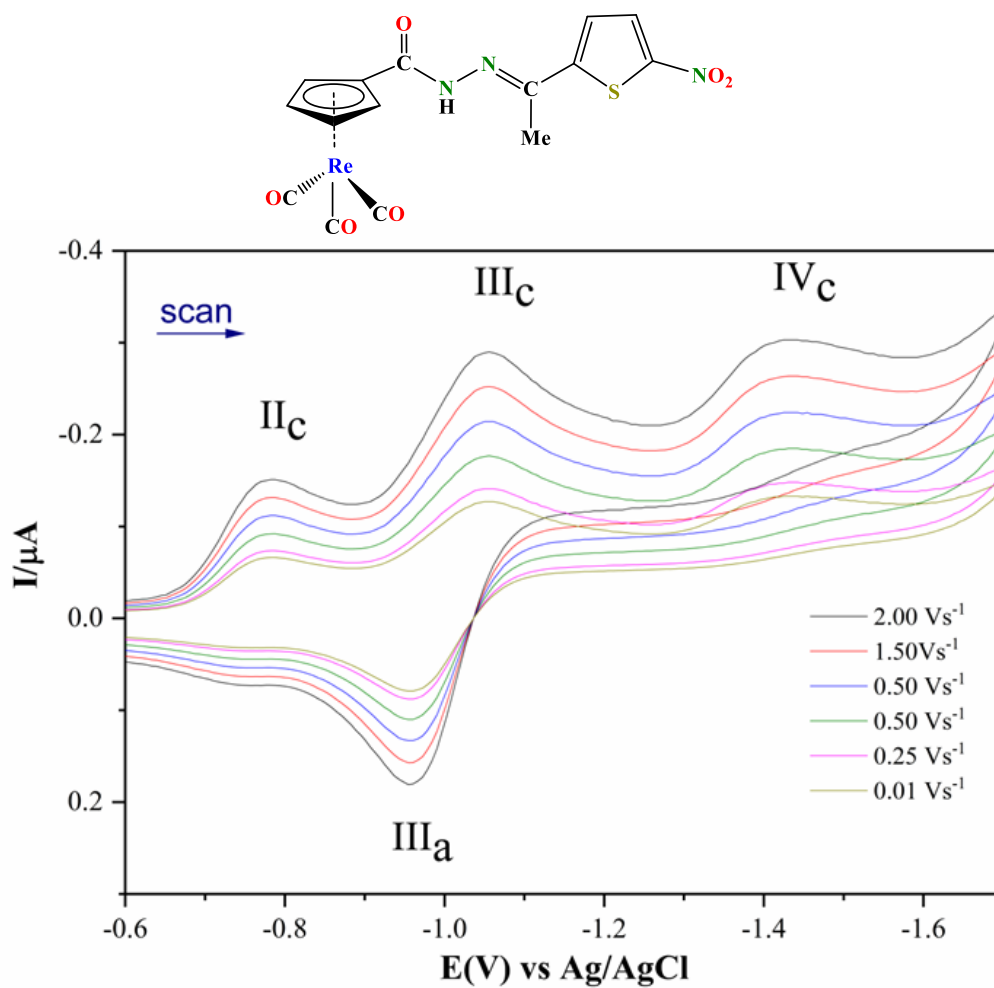

**Figure S46.** Differential pulse voltammograms of **5b** (A) and **6b** (B) derivatives. All experiments were performed in DMSO (TBAP 0.1 M, HMDE, Pt, non-aqueous Ag/AgCl).

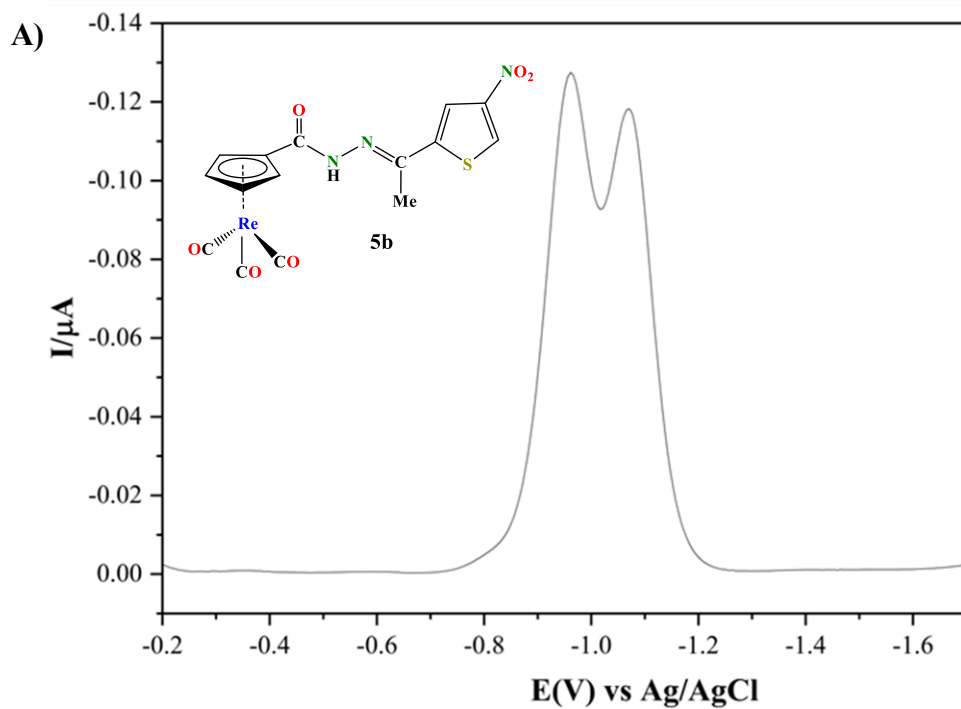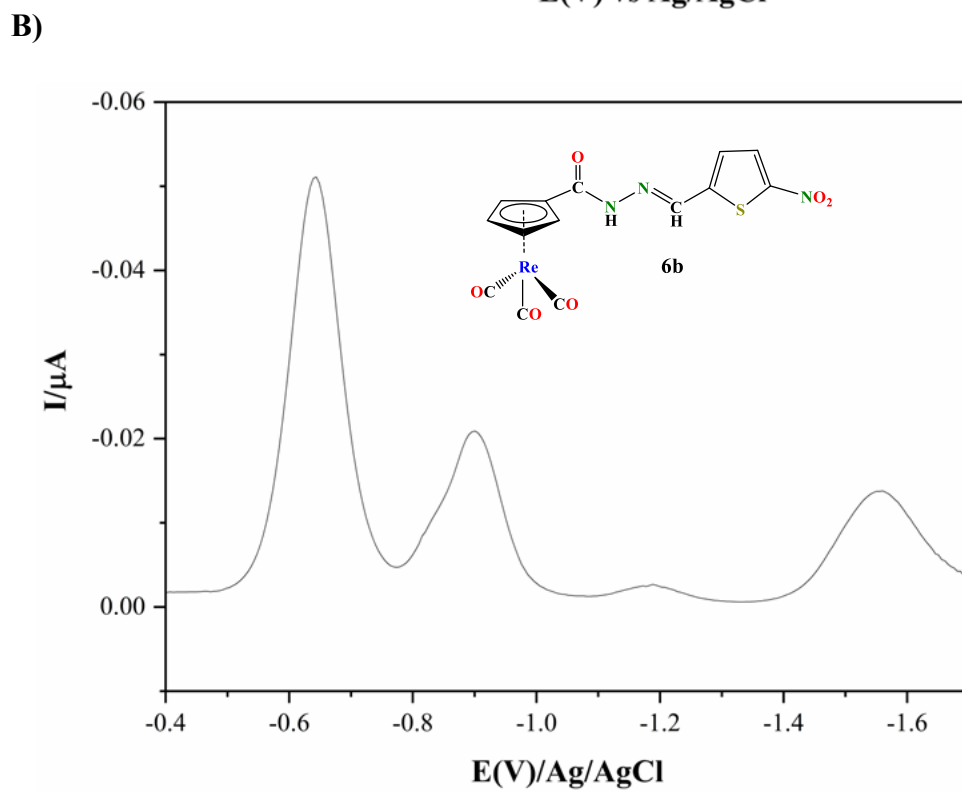

**Figure S47.** Comparative plot of the SI values obtained for NAH compounds (**4a**, **5a**, **6a**, **6b**, **7a**, and Nfx) in *T. cruzi* (A) and *T. brucei* (B).

**A)**

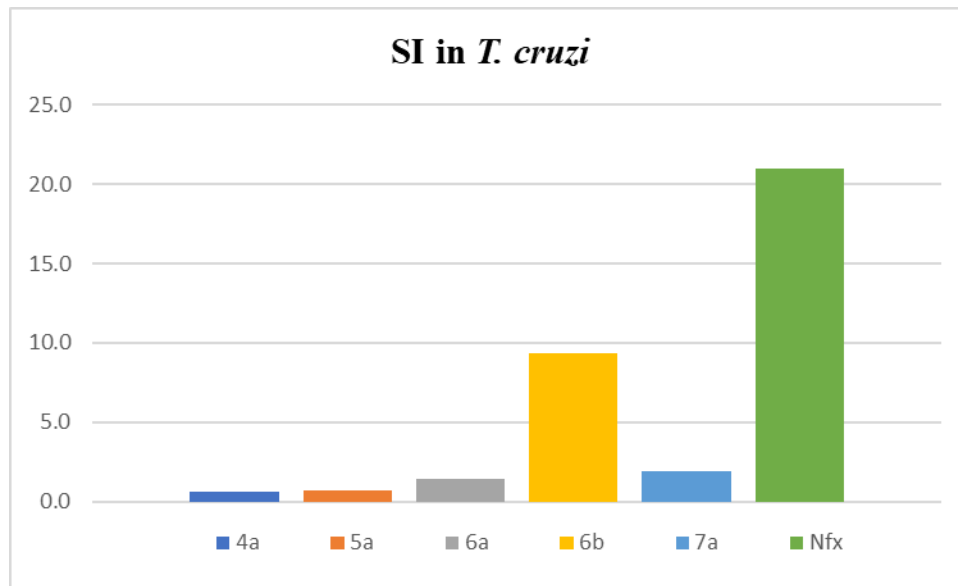

**B)**

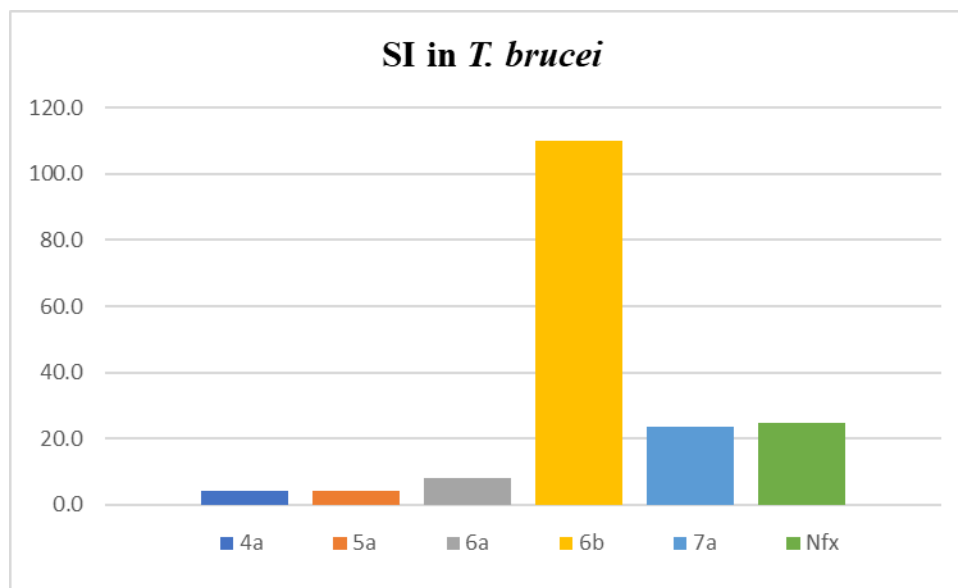

**Figure S48.** Comparative plot of all the NAH compounds (types **E**, **F**, and **G**, and **I** with  $R^2 = H$ ) of their anti-*T. cruzi* activity ( $EC_{50}$ ) and selectivity (SI).

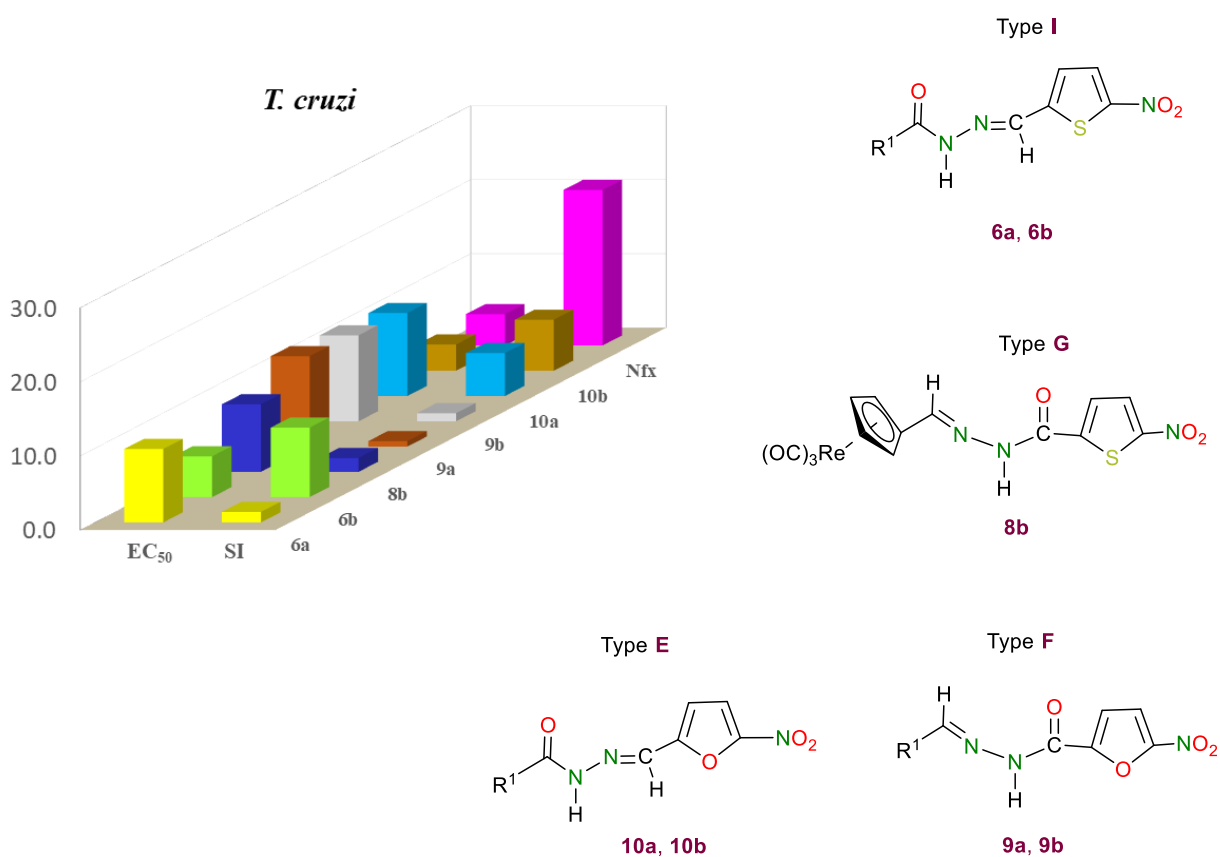

### 3. Supplementary Table

**Table S1.** Crystal data, experimental details, and refinement parameters for complexes [Re $\{(\eta^5\text{-C}_5\text{H}_4)\text{-C(O)-NH-N=CH-(2-C}_4\text{H}_2\text{S-4-NO}_2)\}(\text{CO})_3$ ] (**4b**), [Fe $(\eta^5\text{-C}_5\text{H}_5)\{(\eta^5\text{-C}_5\text{H}_4)\text{-C(O)-NH-N=C(Me)-(2-C}_4\text{H}_2\text{S-4-NO}_2)\}$ ] (**5a**), [Re $\{(\eta^5\text{-C}_5\text{H}_4)\text{-C(O)-NH-N=C(Me)-(2-C}_4\text{H}_2\text{S-4-NO}_2)\}(\text{CO})_3$ ] (**5b**) and [Re $\{(\eta^5\text{-C}_5\text{H}_4)\text{-C(O)-NH-N=CH-(2-C}_4\text{H}_2\text{S-5-NO}_2)\}(\text{CO})_3$ ] (**6b**).

| Compound                               | <b>4b</b>                                                        | <b>5a</b>                                                         | <b>5b</b>                                                         | <b>6b</b>                                                        |
|----------------------------------------|------------------------------------------------------------------|-------------------------------------------------------------------|-------------------------------------------------------------------|------------------------------------------------------------------|
| Empirical formula                      | C <sub>14</sub> H <sub>8</sub> N <sub>3</sub> O <sub>6</sub> ReS | C <sub>17</sub> H <sub>13</sub> FeN <sub>3</sub> O <sub>3</sub> S | C <sub>15</sub> H <sub>10</sub> N <sub>3</sub> O <sub>6</sub> ReS | C <sub>14</sub> H <sub>8</sub> N <sub>3</sub> O <sub>6</sub> ReS |
| Formula weight                         | 532.49                                                           | 397.23                                                            | 546.52                                                            | 532.49                                                           |
| T (K)                                  | 295.9                                                            | 295.5                                                             | 295.7                                                             | 296.9                                                            |
| $\lambda$ (Å)                          | 0.71073                                                          | 1.54178                                                           | 1.54178                                                           | 1.54178                                                          |
| Crystal system                         | Monoclinic                                                       | Monoclinic                                                        | Triclinic                                                         | Triclinic                                                        |
| Space group                            | P2 <sub>1</sub> /c                                               | C2/c                                                              | P-1                                                               | P-1                                                              |
| $a$ (Å), $\alpha$ (°)                  | 12.0195(9), 90                                                   | 18.234(3), 90                                                     | 7.5398(4), 95.862(3)                                              | 6.8710(12), 95.562(5)                                            |
| $b$ (Å), $\beta$ (°)                   | 9.3382(6), 98.538(2)                                             | 8.2285(13), 90.509(11)                                            | 10.0131(5), 92.381(4)                                             | 8.3059(13), 93.119(5)                                            |
| $c$ (Å), $\gamma$ (°)                  | 14.7444(9), 90                                                   | 22.781(4), 90                                                     | 11.6632(6), 99.689(3)                                             | 14.755(3), 94.287(5)                                             |
| $V$ (Å <sup>3</sup> )                  | 1636.58(19)                                                      | 3417.9(10)                                                        | 861.88(8)                                                         | 834.1(2)                                                         |
| $Z$                                    | 4                                                                | 8                                                                 | 2                                                                 | 2                                                                |
| $D_{\text{calc}}$ (g/cm <sup>3</sup> ) | 2.161                                                            | 1.544                                                             | 2.106                                                             | 2.120                                                            |
| $\mu$ (mm <sup>-1</sup> )              | 7.589                                                            | 8.412                                                             | 15.285                                                            | 7.445                                                            |
| $F(000)$                               | 1008.0                                                           | 1632.0                                                            | 520.0                                                             | 504.0                                                            |
| Crystal size (mm <sup>3</sup> )        | 0.262 × 0.256 × 0.196                                            | 0.185 × 0.121 × 0.111                                             | 0.281 × 0.164 × 0.114                                             | 0.131 × 0.121 × 0.097                                            |
| $2\theta$ range (°)                    | From 5.548 to 61.08                                              | From 7.762 to 130.03                                              | From 7.634 to 130.5                                               | From 5.558 to 51.992                                             |
| Index ranges                           | -16 ≤ $h$ ≤ 17<br>-13 ≤ $k$ ≤ 13<br>-20 ≤ $l$ ≤ 21               | -21 ≤ $h$ ≤ 21<br>-9 ≤ $k$ ≤ 9<br>-26 ≤ $l$ ≤ 26                  | -8 ≤ $h$ ≤ 8<br>-11 ≤ $k$ ≤ 11<br>-13 ≤ $l$ ≤ 13                  | -8 ≤ $h$ ≤ 8<br>-10 ≤ $k$ ≤ 10<br>-18 ≤ $l$ ≤ 18                 |
| Reflections collected                  | 38808                                                            | 16251                                                             | 10717                                                             | 29299                                                            |
| Independent reflections                | 4928 [R <sub>int</sub> = 0.0842]                                 | 2866 [R <sub>int</sub> = 0.1260]                                  | 2883 [R <sub>int</sub> = 0.0797]                                  | 3174 [R <sub>int</sub> = 0.0968]                                 |
| Data/parameters                        | 4928/227                                                         | 2866/202                                                          | 2883/236                                                          | 3174/202                                                         |
| Goodness-of-fit on $F^2$               | 1.094                                                            | 1.018                                                             | 1.091                                                             | 1.105                                                            |
| Final $R$ indices [ $I > 2\sigma(I)$ ] | R <sub>1</sub> = 0.0402, wR <sub>2</sub> = 0.0464                | R <sub>1</sub> = 0.0526, wR <sub>2</sub> = 0.1023                 | R <sub>1</sub> = 0.0468, wR <sub>2</sub> = 0.0985                 | R <sub>1</sub> = 0.0464, wR <sub>2</sub> = 0.1092                |
| $R$ indices (all data)                 | R <sub>1</sub> = 0.0972, wR <sub>2</sub> = 0.0571                | R <sub>1</sub> = 0.1274, wR <sub>2</sub> = 0.1279                 | R <sub>1</sub> = 0.0681, wR <sub>2</sub> = 0.1060                 | R <sub>1</sub> = 0.0619, wR <sub>2</sub> = 0.1200                |

**Table S2.** Bond lengths [Å] and angles [°] for **4b**.

| Atoms      | Length/Å  | Atoms     | Length/Å |
|------------|-----------|-----------|----------|
| Re1-C1     | 2.292(4)  | O6-C14    | 1.155(6) |
| Re1-C2     | 2.291(5)  | N1-N2     | 1.375(5) |
| Re1-C3     | 2.296(5)  | N1-C6     | 1.342(6) |
| Re1-C4     | 2.306(5)  | N2-C7     | 1.270(6) |
| Re1-C5     | 2.310(5)  | N3-C10    | 1.460(7) |
| Re1-C12    | 1.918(5)  | C1-C2     | 1.420(7) |
| Re1-C13    | 1.895(6)  | C1-C5     | 1.432(7) |
| Re1-C14    | 1.896(5)  | C1-C6     | 1.481(6) |
| S1-C8      | 1.718(5)  | C2-C3     | 1.401(7) |
| S1-C11     | 1.687(7)  | C3-C4     | 1.409(8) |
| O1-C6      | 1.237(6)  | C4-C5     | 1.418(7) |
| O2-N3      | 1.204(6)  | C7-C8     | 1.448(7) |
| O3-N3      | 1.224(6)  | C8-C9     | 1.350(6) |
| O4-C12     | 1.138(6)  | C9-C10    | 1.399(7) |
| O5-C13     | 1.153(6)  | C10-C11   | 1.337(7) |
|            |           |           |          |
| Atoms      | Angles/°  | Atoms     | Angles/° |
| C1-Re1-C3  | 60.14(17) | C2-C2-Re1 | 71.9(3)  |
| C1-Re1-C4  | 59.83(18) | C2-C1-C5  | 107.1(4) |
| C1-Re1-C5  | 36.25(17) | C2-C1-C6  | 120.5(5) |
| C2-Re1-C1  | 36.11(16) | C5-C1-Re1 | 72.6(3)  |
| C2-Re1-C3  | 35.57(18) | C5-C1-C6  | 131.9(5) |
| C2-Re1-C4  | 59.1(2)   | C6-C1-Re1 | 126.3(3) |
| C2-Re1-C5  | 59.8(2)   | C1-C2-Re1 | 72.0(3)  |
| C3-Re1-C4  | 35.6(2)   | C3-C2-Re1 | 72.4(3)  |
| C3-Re1-C5  | 59.9(2)   | C3-C2-C1  | 109.1(5) |
| C4-Re1-C5  | 35.77(17) | C2-C3-Re1 | 72.0(3)  |
| C12-Re1-C1 | 110.7(2)  | C2-C3-C4  | 107.7(5) |
| C12-Re1-C2 | 146.6(2)  | C4-C3-Re1 | 72.6(3)  |
| C12-Re1-C3 | 150.3(2)  | C3-C4-Re1 | 71.8(3)  |
| C12-Re1-C4 | 114.7(2)  | C3-C4-C5  | 109.0(5) |
| C12-Re1-C5 | 95.4(2)   | C5-C4-Re1 | 72.3(3)  |
| C13-Re1-C1 | 102.5(2)  | C1-C5-Re1 | 71.2(3)  |
| C13-Re1-C2 | 94.0(2)   | C4-C5-Re1 | 72.0(3)  |
| C13-Re1-C3 | 118.6(2)  | C4-C5-C1  | 107.2(5) |

|             |            |            |          |
|-------------|------------|------------|----------|
| C13-Re1-C4  | 152.6(2)   | O1-C6-N1   | 119.1(5) |
| C13-Re1-C5  | 137.1(2)   | O1-C6-C1   | 119.0(5) |
| C13-Re1-C12 | 90.5(2)    | N1-C6-C1   | 121.9(5) |
| C13-Re1-C14 | 89.5(2)    | N2-C7-C8   | 119.6(5) |
| C14-Re1-C1  | 156.74(18) | C7-C8-S1   | 119.6(4) |
| C14-Re1-C2  | 124.31(19) | C9-C8-S1   | 111.6(4) |
| C14-Re1-C3  | 96.6(2)    | C9-C8-C7   | 128.8(5) |
| C14-Re1-C4  | 101.1(2)   | C8-C9-C10  | 111.0(5) |
| C14-Re1-C5  | 133.0(2)   | C9-C10-N3  | 122.9(5) |
| C14-Re1-C12 | 88.8(2)    | C11-C10-N3 | 122.3(6) |
| C11-S1-C8   | 91.6(3)    | C11-C10-C9 | 114.7(5) |
| C6-N1-N2    | 122.7(4)   | C10-C11-S1 | 111.0(5) |
| C7-N2-N1    | 115.3(4)   | O4-C12-Re1 | 178.7(5) |
| O2-N3-O3    | 124.7(6)   | O5-C13-Re1 | 175.9(5) |
| O2-N3-C10   | 117.7(6)   | O6-C14-Re1 | 179.4(5) |
| O3-N3-C10   | 117.6(6)   |            |          |
|             |            |            |          |

**Table S3.** Bond lengths [Å] and angles [°] for **5a**.

| Atoms       | Length/Å  | Atoms     | Length/Å |
|-------------|-----------|-----------|----------|
| Fe1-C1      | 2.017(4)  | C1-C6     | 1.471(6) |
| Fe1-C2      | 2.033(5)  | C2-C3     | 1.405(6) |
| Fe1-C3      | 2.048(5)  | C3-C4     | 1.403(6) |
| Fe1-C4      | 2.054(5)  | C4-C5     | 1.418(6) |
| Fe1-C5      | 2.031(5)  | C7-C8     | 1.451(6) |
| Fe1-C17     | 2.020(7)  | C7-C12    | 1.492(6) |
| Fe1-C13     | 2.006(6)  | C8-C9     | 1.372(6) |
| Fe1-C14     | 2.009(6)  | C8-S1     | 1.727(4) |
| Fe1-C15     | 2.025(6)  | C9-C10    | 1.392(6) |
| Fe1-C16     | 2.031(6)  | C10-C11   | 1.331(6) |
| Fe1-C17A    | 2.104(17) | C11-S1    | 1.701(5) |
| Fe1-C16A    | 2.090(16) | C17-C13   | 1.4200   |
| O1-C6       | 1.222(5)  | C17-C16   | 1.4200   |
| O2-N3       | 1.218(5)  | C13-C14   | 1.4200   |
| O3-N3       | 1.219(5)  | C14-C15   | 1.4200   |
| N1-N2       | 1.371(5)  | C15-C16   | 1.4200   |
| N1-C6       | 1.360(6)  | C17A-C13A | 1.4200   |
| N2-C7       | 1.300(5)  | C17A-C16A | 1.4200   |
| N3-C10      | 1.451(6)  | C13A-C14A | 1.4200   |
| C1-C2       | 1.428(6)  | C14A-C15A | 1.4200   |
| C1-C5       | 1.432(6)  | C15A-C16A | 1.4200   |
|             |           |           |          |
| Atoms       | Angles/°  | Atoms     | Angles/° |
| C1-Fe1-C2   | 41.30(18) | C2-C1-C5  | 106.9(4) |
| C1-Fe1-C3   | 68.95(19) | C2-C1-C6  | 121.0(4) |
| C1-Fe1-C4   | 68.81(18) | C5-C1-Fe1 | 69.8(2)  |
| C1-Fe1-C5   | 41.44(17) | C5-C1-C6  | 132.1(4) |
| C1-Fe1-C17  | 120.1(3)  | C6-C1-Fe1 | 124.0(3) |
| C1-Fe1-C15  | 160.2(3)  | C1-C2-Fe1 | 68.7(3)  |
| C1-Fe1-C16  | 156.7(3)  | C3-C2-Fe1 | 70.4(3)  |
| C1-Fe1-C17A | 129.7(6)  | C3-C2-C1  | 108.6(5) |
| C1-Fe1-C15A | 169.2(7)  | C2-C3-Fe1 | 69.3(3)  |
| C2-Fe1-C3   | 40.28(18) | C4-C3-Fe1 | 70.2(3)  |
| C2-Fe1-C4   | 67.7(2)   | C4-C3-C2  | 108.3(5) |
| C2-Fe1-C17A | 168.7(7)  | C3-C4-Fe1 | 69.8(3)  |

|             |            |                |          |
|-------------|------------|----------------|----------|
| C2-Fe1-C16A | 149.5(7)   | C3-C4-C5       | 108.7(4) |
| C3-Fe1-C4   | 40.00(18)  | C5-C4-Fe1      | 68.8(3)  |
| C3-Fe1-C17A | 150.2(6)   | C1-C5-Fe1      | 68.8(3)  |
| C3-Fe1-C16A | 119.7(5)   | C4-C5-Fe1      | 70.6(3)  |
| C4-Fe1-C17A | 118.2(5)   | C4-C5-C1       | 107.6(4) |
| C4-Fe1-C16A | 113.1(4)   | O1-C6-N1       | 118.5(4) |
| C5-Fe1-C2   | 68.86(19)  | O1-C6-C1       | 120.6(5) |
| C5-Fe1-C3   | 68.4(2)    | N1-C6-C1       | 120.9(4) |
| C5-Fe1-C4   | 40.63(17)  | N2-C7-C8       | 113.4(4) |
| C5-Fe1-C16  | 121.7(3)   | N2-C7-C12      | 126.7(4) |
| C5-Fe1-C17A | 108.8(4)   | C8-C7-C12      | 119.9(4) |
| C5-Fe1-C16A | 133.1(7)   | C7-C8-S1       | 119.5(4) |
| C17-Fe1-C2  | 155.8(3)   | C9-C8-C7       | 130.2(4) |
| C17-Fe1-C3  | 162.6(3)   | C9-C8-S1       | 110.3(3) |
| C17-Fe1-C4  | 126.1(3)   | C8-C9-C10      | 111.4(4) |
| C17-Fe1-C5  | 107.6(2)   | C9-C10-N3      | 122.9(5) |
| C17-Fe1-C15 | 69.24(17)  | C11-C10-N3     | 121.5(4) |
| C17-Fe1-C16 | 41.04(13)  | C11-C10-C9     | 115.7(5) |
| C13-Fe1-C1  | 105.17(19) | C10-C11-S1     | 110.5(4) |
| C13-Fe1-C2  | 119.5(3)   | C13-C17-Fe1    | 68.8(2)  |
| C13-Fe1-C3  | 155.1(4)   | C16-C17-Fe1    | 69.9(2)  |
| C13-Fe1-C4  | 162.3(4)   | C16-C17-C13    | 108      |
| C13-Fe1-C5  | 124.0(3)   | C17-C13-Fe1    | 69.9(2)  |
| C13-Fe1-C17 | 41.31(13)  | C14-C13-Fe1    | 69.4(2)  |
| C13-Fe1-C14 | 41.43(11)  | C14-C13-C17    | 108      |
| C13-Fe1-C15 | 69.51(16)  | C13-C14-Fe1    | 69.2(2)  |
| C13-Fe1-C16 | 69.38(17)  | C13-C14-C15    | 108      |
| C14-Fe1-C1  | 122.4(3)   | C15-C14-Fe1    | 70.0(2)  |
| C14-Fe1-C2  | 105.6(2)   | C14-C15-Fe1    | 68.8(2)  |
| C14-Fe1-C3  | 120.0(3)   | C14-C15-C16    | 108      |
| C14-Fe1-C4  | 155.9(4)   | C16-C15-Fe1    | 69.8(2)  |
| C14-Fe1-C5  | 160.8(3)   | C17-C16-Fe1    | 69.0(2)  |
| C14-Fe1-C17 | 69.55(17)  | C15-C16-Fe1    | 69.3(2)  |
| C14-Fe1-C15 | 41.23(11)  | C15-C16-C17    | 108      |
| C14-Fe1-C16 | 69.32(16)  | C13A-C17A-Fe1  | 71.9(6)  |
| C15-Fe1-C2  | 123.5(3)   | C16A-C17A-Fe1  | 69.7(6)  |
| C15-Fe1-C3  | 107.4(2)   | C16A-C17A-C13A | 108      |
| C15-Fe1-C4  | 121.7(3)   | C17A-C13A-Fe1  | 69.0(6)  |

|               |           |                |         |
|---------------|-----------|----------------|---------|
| C15-Fe1-C5    | 157.0(3)  | C14A-C13A-Fe1  | 71.0(6) |
| C15-Fe1-C16   | 40.99(12) | C14A-C13A-C17A | 108     |
| C16-Fe1-C2    | 161.2(3)  | C13A-C14A-Fe1  | 70.3(6) |
| C16-Fe1-C3    | 125.4(3)  | C15A-C14A-Fe1  | 69.4(6) |
| C16-Fe1-C4    | 109.2(2)  | C15A-C14A-C13A | 108     |
| C16A-Fe1-C17A | 39.6(3)   | C14A-C15A-Fe1  | 71.8(6) |
| C6-N1-N2      | 122.4(4)  | C14A-C15A-C16A | 108     |
| C7-N2-N1      | 117.7(4)  | C16A-C15A-Fe1  | 69.2(6) |
| O2-N3-O3      | 123.3(5)  | C17A-C16A-Fe1  | 70.7(6) |
| O2-N3-C10     | 117.8(4)  | C17A-C16A-C15A | 108     |
| O3-N3-C10     | 118.9(5)  | C15A-C16A-Fe1  | 71.4(6) |
| C2-C1-Fe1     | 70.0(3)   | C11-S1-C8      | 92.2(3) |
|               |           |                |         |

**Table S4.** Bond lengths [Å] and angles [°] for **5b**.

| <b>Atoms</b> | <b>Length/Å</b> | <b>Atoms</b> | <b>Length/Å</b> |
|--------------|-----------------|--------------|-----------------|
| Re1-C1       | 2.308(8)        | N1-N2        | 1.376(10)       |
| Re1-C2       | 2.293(9)        | N1-C6        | 1.358(11)       |
| Re1-C3       | 2.303(10)       | N2-C7        | 1.283(11)       |
| Re1-C4       | 2.294(9)        | N3-C10       | 1.463(12)       |
| Re1-C5       | 2.283(9)        | C1-C2        | 1.434(12)       |
| Re1-C13      | 1.899(11)       | C1-C5        | 1.431(12)       |
| Re1-C14      | 1.927(12)       | C1-C6        | 1.463(12)       |
| Re1-C15      | 1.897(10)       | C2-C3        | 1.394(13)       |
| S1-C8        | 1.727(8)        | C3-C4        | 1.400(14)       |
| S1-C11       | 1.696(10)       | C4-C5        | 1.396(12)       |
| O1-C6        | 1.219(10)       | C7-C8        | 1.466(12)       |
| O2-N3        | 1.208(10)       | C7-C12       | 1.484(11)       |
| O3-N3        | 1.236(10)       | C8-C9        | 1.356(12)       |
| O4-C13       | 1.158(12)       | C9-C10       | 1.392(12)       |
| O5-C14       | 1.134(12)       | C10-C11      | 1.342(13)       |
| O6-C15       | 1.153(12)       |              |                 |
|              |                 |              |                 |
| <b>Atoms</b> | <b>Angles/°</b> | <b>Atoms</b> | <b>Angles/°</b> |
| C2-Re1-C1    | 36.3(3)         | C2-C1-C6     | 119.6(8)        |
| C2-Re1-C3    | 35.3(3)         | C5-C1-Re1    | 70.9(5)         |
| C2-Re1-C4    | 58.8(4)         | C5-C1-C2     | 105.2(8)        |
| C3-Re1-C1    | 60.2(3)         | C5-C1-C6     | 135.1(8)        |
| C4-Re1-C1    | 59.8(3)         | C6-C1-Re1    | 124.4(6)        |
| C4-Re1-C3    | 35.5(4)         | C1-C2-Re1    | 72.4(5)         |
| C5-Re1-C1    | 36.3(3)         | C3-C2-Re1    | 72.7(6)         |
| C5-Re1-C2    | 59.7(3)         | C3-C2-C1     | 109.7(9)        |
| C5-Re1-C3    | 59.6(4)         | C2-C3-Re1    | 72.0(5)         |
| C5-Re1-C4    | 35.5(3)         | C2-C4-C4     | 107.3(8)        |
| C13-Re1-C1   | 103.6(4)        | C4-C3-Re1    | 71.9(6)         |
| C13-Re1-C2   | 138.5(4)        | C3-C4-Re1    | 72.6(6)         |
| C13-Re1-C3   | 153.7(4)        | C5-C4-Re1    | 71.8(5)         |
| C13-Re1-C4   | 119.4(4)        | C5-C4-C3     | 109.3(8)        |
| C13-Re1-C5   | 94.8(4)         | C1-C5-Re1    | 72.8(5)         |
| C13-Re1-C14  | 90.1(4)         | C4-C5-Re1    | 72.7(5)         |
| C14-Re1-C1   | 108.2(4)        | C4-C5-C1     | 108.5(8)        |

|             |          |            |           |
|-------------|----------|------------|-----------|
| C14-Rel-C2  | 94.3(4)  | O1-C6-N1   | 118.8(8)  |
| C14-Rel-C3  | 114.0(5) | O1-C6-C1   | 120.3(8)  |
| C14-Rel-C4  | 149.4(4) | N1-C6-C1   | 120.8(8)  |
| C14-Rel-C5  | 144.2(4) | N2-C7-C8   | 114.2(7)  |
| C15-Rel-C1  | 157.1(4) | N2-C7-C12  | 126.5(8)  |
| C15-Rel-C2  | 130.7(4) | C8-C7-C12  | 119.3(8)  |
| C15-Rel-C3  | 99.7(4)  | C7-C8-S1   | 119.0(6)  |
| C15-Rel-C4  | 97.6(4)  | C9-C8-S1   | 110.9(6)  |
| C15-Rel-C5  | 125.9(4) | C9-C8-C7   | 130.1(7)  |
| C15-Rel-C13 | 90.5(4)  | C8-C9-C10  | 111.6(8)  |
| C15-Rel-C14 | 89.4(4)  | C9-C10-N3  | 123.3(8)  |
| C11-S1-C8   | 91.9(4)  | C11-C10-N3 | 121.6(8)  |
| C6-N1-N2    | 122.4(7) | C11-C10-C9 | 115.0(8)  |
| C7-N2-N1    | 118.4(7) | C10-C11-S1 | 110.6(7)  |
| O2-N3-O3    | 124.6(9) | O4-C13-Rel | 177.5(9)  |
| O2-N3-C10   | 118.1(8) | O5-C14-Rel | 176.8(10) |
| O3-N3-C10   | 117.2(9) | O6-C15-Rel | 178.6(11) |
| C2-C1-Rel   | 71.3(5)  |            |           |
|             |          |            |           |

**Table S5.** Bond lengths [Å] and angles [°] for **6b**.

|              |                 |              |                 |
|--------------|-----------------|--------------|-----------------|
| Re1-C1       | 2.288(9)        | O5-C13       | 1.144(14)       |
| Re1-C2       | 2.301(9)        | N1-N2        | 1.380(10)       |
| Re1-C3       | 2.302(10)       | N1-C6        | 1.338(11)       |
| Re1-C4       | 2.296(9)        | N2-C7        | 1.285(12)       |
| Re1-C5       | 2.300(9)        | C1-C2        | 1.421(13)       |
| Re1-C12      | 1.882(13)       | C1-C5        | 1.425(12)       |
| Re1-C13      | 1.903(11)       | C1-C6        | 1.490(12)       |
| Re1-C14      | 1.887(11)       | C2-C3        | 1.399(13)       |
| S1-C8        | 1.717(10)       | C3-C4        | 1.406(14)       |
| S1-C11       | 1.714(12)       | C4-C5        | 1.417(13)       |
| O1-C6        | 1.234(10)       | C7-C8        | 1.458(13)       |
| N3-O2        | 1.28(2)         | C8-C9        | 1.348(15)       |
| N3-O3        | 1.15(2)         | C9-C10       | 1.412(16)       |
| N3-C11       | 1.472(17)       | C10-C11      | 1.318(18)       |
| O4-C12       | 1.169(15)       | C14-O6       | 1.163(14)       |
|              |                 |              |                 |
| <b>Atoms</b> | <b>Angles/°</b> | <b>Atoms</b> | <b>Angles/°</b> |
| C1-Re1-C2    | 36.1(3)         | C2-C1-Re1    | 72.5(5)         |
| C1-Re1-C3    | 59.8(3)         | C2-C1-C5     | 107.4(8)        |
| C1-Re1-C4    | 59.9(3)         | C2-C1-C6     | 119.6(8)        |
| C1-Re1-C5    | 36.2(3)         | C5-C1-Re1    | 72.4(5)         |
| C2-Re1-C3    | 35.4(3)         | C5-C1-C6     | 132.9(8)        |
| C4-Re1-C2    | 59.3(3)         | C6-C1-Re1    | 122.7(6)        |
| C4-Re1-C3    | 35.6(4)         | C1-C2-Re1    | 71.5(5)         |
| C4-Re1-C5    | 35.9(3)         | C3-C2-Re1    | 72.3(5)         |
| C5-Re1-C2    | 59.8(3)         | C3-C2-C1     | 108.4(8)        |
| C5-Re1-C3    | 59.7(4)         | C2-C3-Re1    | 72.3(5)         |
| C12-Re1-C1   | 98.9(4)         | C2-C3-C4     | 108.4(8)        |
| C12-Re1-C2   | 98.1(4)         | C4-C3-Re1    | 72.0(5)         |
| C12-Re1-C3   | 127.2(4)        | C3-C4-Re1    | 72.4(6)         |
| C12-Re1-C4   | 156.7(4)        | C3-C4-C5     | 108.4(8)        |
| C12-Re1-C5   | 130.2(4)        | C5-C4-Re1    | 72.2(5)         |
| C12-Re1-C13  | 90.3(5)         | C1-C5-Re1    | 71.4(5)         |
| C12-Re1-C14  | 90.1(5)         | C4-C5-Re1    | 71.9(5)         |
| C13-Re1-C1   | 153.0(4)        | C4-C5-C1     | 107.4(8)        |

|             |           |            |           |
|-------------|-----------|------------|-----------|
| C13-Rel-C2  | 117.7(4)  | O1-C6-N1   | 118.9(8)  |
| C13-Rel-C3  | 94.6(4)   | O1-C6-C1   | 118.7(8)  |
| C13-Rel-C4  | 104.8(4)  | N1-C6-C1   | 122.4(8)  |
| C13-Rel-C5  | 139.3(4)  | N2-C7-C8   | 119.6(8)  |
| C14-Rel-C1  | 116.0(4)  | C7-C8-S1   | 121.7(7)  |
| C14-Rel-C2  | 151.7(4)  | C9-C8-S1   | 113.0(8)  |
| C14-Rel-C3  | 142.4(5)  | C9-C8-C7   | 125.3(10) |
| C14-Rel-C4  | 107.5(4)  | C8-C9-C10  | 112.0(12) |
| C14-Rel-C5  | 94.4(4)   | C11-C10-C9 | 111.5(11) |
| C14-Rel-C13 | 89.1(5)   | N3-C11-S1  | 116.4(12) |
| C11-S1-C8   | 88.8(5)   | C10-C11-S1 | 114.8(9)  |
| O2-N3-C11   | 111.5(17) | C10-C11-N3 | 128.9(13) |
| O3-N3-O2    | 127.7(16) | O4-C12-Rel | 177.8(10) |
| O3-N3-C11   | 120.8(16) | O5-C13-Rel | 177.2(11) |
| C6-N1-N2    | 123.9(7)  | O6-C14-Rel | 176.2(11) |
| C7-N2-N1    | 113.9(7)  |            |           |
|             |           |            |           |

**Table S6.** Hydrogen bonds for **4b**.

| D   | H   | A               | d(D-H)/Å | d(H-A)/Å | d(D-A)/Å | D-H-A/° |
|-----|-----|-----------------|----------|----------|----------|---------|
| N1  | H1  | O1 <sup>1</sup> | 0.86     | 2.03     | 2.884(5) | 170.9   |
| C3  | H3  | O4 <sup>2</sup> | 0.93     | 2.73     | 3.450(7) | 135.0   |
| C4  | H4  | O5 <sup>3</sup> | 0.93     | 2.71     | 3.481(7) | 140.5   |
| C7  | H7  | O2 <sup>4</sup> | 0.93     | 2.51     | 3.298(7) | 142.6   |
| C9  | H9  | O2 <sup>4</sup> | 0.93     | 2.67     | 3.389(7) | 135.1   |
| C11 | H11 | O5 <sup>5</sup> | 0.93     | 2.61     | 3.360(8) | 138.6   |

<sup>1</sup>1-x,-y,1-z; <sup>2</sup>+x,1/2-y,1/2+z; <sup>3</sup>1-x,1/2+y,3/2-z; <sup>4</sup>-x,-1/2+y,1/2-z; <sup>5</sup>+x,1+y,+z

**Table S7.** Hydrogen bonds for **5a**.

| D   | H   | A               | d(D-H)/Å | d(H-A)/Å | d(D-A)/Å | D-H-A/° |
|-----|-----|-----------------|----------|----------|----------|---------|
| N1  | H1  | O1 <sup>1</sup> | 0.86     | 2.08     | 2.918(5) | 164.7   |
| C9  | H9  | O2 <sup>2</sup> | 0.93     | 2.48     | 3.353(7) | 157.3   |
| C13 | H13 | O3 <sup>3</sup> | 0.93     | 2.53     | 3.422(5) | 159.5   |
| C15 | H15 | O3 <sup>4</sup> | 0.93     | 2.50     | 3.420(5) | 171.8   |

<sup>1</sup>1/2-x,1/2-y,1-z; <sup>2</sup>1-x,2-y,1-z; <sup>3</sup>1/2+x,-1/2+y,+z; <sup>4</sup>1-x,-1+y,3/2-z

**Table S8.** Hydrogen bonds for **5b**.

| D   | H   | A               | d(D-H)/Å | d(H-A)/Å | d(D-A)/Å  | D-H-A/° |
|-----|-----|-----------------|----------|----------|-----------|---------|
| N1  | H1  | O1 <sup>1</sup> | 0.86     | 2.08     | 2.912(9)  | 162.6   |
| C3  | H3  | O4 <sup>2</sup> | 0.93     | 2.68     | 3.408(13) | 135.4   |
| C11 | H11 | O5 <sup>3</sup> | 0.93     | 2.43     | 3.330(12) | 161.8   |

<sup>1</sup>1-x,2-y,2-z; <sup>2</sup>-1+x,+y,+z; <sup>3</sup>+x,-1+y,+z

**Table S9.** Hydrogen bonds for **6b**.

| D   | H   | A               | d(D-H)/Å | d(H-A)/Å | d(D-A)/Å  | D-H-A/° |
|-----|-----|-----------------|----------|----------|-----------|---------|
| C3  | H3  | O4 <sup>1</sup> | 0.93     | 2.63     | 3.442(14) | 146.1   |
| C4  | H4  | O2 <sup>2</sup> | 0.93     | 2.49     | 3.265(15) | 140.4   |
| C5  | H5  | O5 <sup>3</sup> | 0.93     | 2.84     | 3.420(14) | 121.3   |
| C7  | H7  | O5 <sup>4</sup> | 0.93     | 2.60     | 3.421(14) | 146.9   |
| C9  | H9  | O5 <sup>4</sup> | 0.93     | 2.68     | 3.462(17) | 142.3   |
| C10 | H10 | O6 <sup>5</sup> | 0.93     | 2.49     | 3.416(17) | 172.8   |

<sup>1</sup>1+x,+y,+z; <sup>2</sup>1-x,1-y,1-z; <sup>3</sup>+x,-1+y,+z; <sup>4</sup>1+x,-1+y,+z; <sup>5</sup>2-x,1-y,1-z

**Table S10.** Summary of experimental ultraviolet-visible spectroscopic data: position of the bands detected [wavelengths  $\lambda_i$  (nm)] and logarithms of their molar extinction coefficients [ $\log \epsilon_i$  ( $\epsilon_i$  in  $M^{-1} \text{ cm}^{-1}$ )] for the new organometallic NAHs (**4a,b** – **7a,b**) [Types **H** and **I** in Figure 3).

|                                   |                                                                                                                                                                  |           |                                  |           |                                                                                                                                                                  |           |                            |           |
|-----------------------------------|------------------------------------------------------------------------------------------------------------------------------------------------------------------|-----------|----------------------------------|-----------|------------------------------------------------------------------------------------------------------------------------------------------------------------------|-----------|----------------------------|-----------|
|                                   | <p style="text-align: center;"><b>H-type</b></p> <p style="text-align: center;"><math>R^2 = H</math> (<b>4a-4b</b>)     <math>R^2 = Me</math> (<b>5a-5b</b>)</p> |           |                                  |           | <p style="text-align: center;"><b>I-type</b></p> <p style="text-align: center;"><math>R^2 = H</math> (<b>6a-6b</b>)     <math>R^2 = Me</math> (<b>7a-7b</b>)</p> |           |                            |           |
| <b>Compounds<sup>a</sup> →</b>    | <b>4a</b>                                                                                                                                                        | <b>4b</b> | <b>5a</b>                        | <b>5b</b> | <b>6a</b>                                                                                                                                                        | <b>6b</b> | <b>7a</b>                  | <b>7b</b> |
| $\lambda_1$ ( $\log \epsilon_1$ ) | 273 (4.0)                                                                                                                                                        | 275 (4.0) | 273 (3.9)                        | 275 (4.0) | 260 (4.0)                                                                                                                                                        | 268 (3.9) | 266 (4.0)                  | 271 (4.0) |
| $\lambda_2$ ( $\log \epsilon_2$ ) | 313 (4.0)                                                                                                                                                        | 316 (4.0) | 314 (4.0)                        | 313 (4.0) | 383 (3.9)                                                                                                                                                        | 385 (4.0) | 380 (4.0)                  | 385 (4.0) |
| $\lambda_3$ ( $\log \epsilon_3$ ) | $\approx 460$ (2.8) <sup>b</sup>                                                                                                                                 | —         | $\approx 468$ (2.9) <sup>b</sup> | —         | —                                                                                                                                                                | —         | $\approx 498$ <sup>c</sup> | —         |

<sup>a</sup> Data obtained from the spectra recorded from fresh solutions of the compounds ( $t = 0$  h).

<sup>b</sup> Broad band {see also figures S17 (for **4a**) and S21 (for **4b**)}.

<sup>c</sup> This absorption appears as a shoulder (see figure S20).

#### 4. Supplementary References

- S1.** P. Toro, C. Suazo, A. Acuña, M. Fuentealba, V. Artigas, R. Arancibia, C. Olea-Azar, M. Moncada, S. Wilkinson, A. H. Klahn, Cyrhetrenylaniline and new organometallic phenylimines derived from 4- and 5-nitrothiophene: Synthesis, characterization, X-Ray structures, electrochemistry and in vitro anti-T. brucei activity, *J. Organomet. Chem.*, 2018, **862**, 13.
- S2.** B.P. Fabrichnyi, S.M. Kostrova, G.P. Gromova, Y. L. Gol'dfarb, Directive nature of the nitration of the oximes of 2-acetylthiophene and 2-propionylthiophene, *Chem. Heterocycl. Compd.* 1973, **9**, 1341.
- S3.** D. J. van Dijken, P. Kovaříček, S. P. Ihrig, S. Hecht, Acylhydrazones as Widely Tunable Photoswitches, *J. Am. Chem. Soc.*, 2015, **137**, 14982–14991.
- S4.** M. Mallea, A. Acuña, A. H. Klahn, V. Artigas, F. Rogério Pavan, F. Manaia Demarqui, L. Lemus, D. H. Jara, P. M. Toro, Cyrhetrenyl and cymantrenyl N-acylhydrazone complexes based on isoniazid: Synthesis, characterization, X-ray crystal structures and antitubercular activity evaluation, *J. Organomet. Chem.*, 2022, **964**, 122299.
